# Supplementary material for: One-pot preparation of isocyanides from amines and their multicomponent reactions: crucial role of dehydrating agent and base
Source: Royal Society of Chemistry journal article supplement (doi:10.1039/c3ra40347e), 2013-01-01

**Electronic Supplementary Information**

**One-pot Preparation of Isocyanides from Amines and their Multicomponent Reactions: Crucial Role of  
Dehydrating agent and Base**

*Sankar K. Guchhait,\* Garima Priyadarshani, Vikas Chaudhary, Darshan R. Seladiya, Tapan M. Shah, and Nikita  
P. Bhogayta*

*Department of Medicinal Chemistry*

*National Institute of Pharmaceutical Education and Research (NIPER), S. A. S. Nagar (Mohali) - 160062,*

*Punjab, India, Fax: 91 (0)172 2214692; Tel: 91 (0)172 2214683*

*Email: [skguchhait@niper.ac.in](mailto:skguchhait@niper.ac.in)*

**Table of Contents**

General Information..... S1

NMR Spectra (<sup>1</sup>H and <sup>13</sup>C) of compounds (**6a-n**) .....S2-S29

NMR Spectra (<sup>1</sup>H and <sup>13</sup>C) of Compounds (**7a-o**).....S30-S59

## General Information

$^1\text{H}$  NMR spectra were recorded on a Bruker Avance III-400 (400 MHz) spectrometer. Tetramethylsilane as an internal standard and NMR solvent  $\text{CDCl}_3$ ,  $\text{CD}_3\text{OD}$  or  $\text{DMSO}-d_6$  were used. Chemical shifts are in ppm. The  $^1\text{H}$  NMR data includes the integration, multiplicity (s = singlet, d = doublet, t = triplet, q = quartet, m = multiplet, td = triplet of doublet, dt = doublet of triplet, br = broad), and coupling constants (Hz).  $^{13}\text{C}$  NMR spectra were recorded on a Bruker Avance III-400 (100 MHz) spectrometer with complete proton decoupling. Chemical shifts are in ppm with NMR solvent as an internal standard. The acquisition of High-resolution mass spectra (HRMS) was performed on Bruker maxis Q-TOF. Infrared (IR) spectra were recorded on a Perkin Elmer FTIR with ATR and IR Microscope spectrometer. For thin layer chromatography (TLC) analysis, Merck precoated TLC plates (silica gel 60 GF 254, 0.25 mm) were used. The products were purified by column chromatography with silica gel 60-120 (Merck, silica gel 60-120 mesh, neutral, spherical) or preparative thin layer chromatography silica gel (Rankem, Silica Gel GF 254, 400 mesh). Melting points determined are uncorrected.

All commercially obtained reagents were used as received. Acetonitrile solvent was made anhydrous by distillation on calcium hydride.

Spectra of compounds (6a-n)  
6a: <sup>1</sup>H NMR

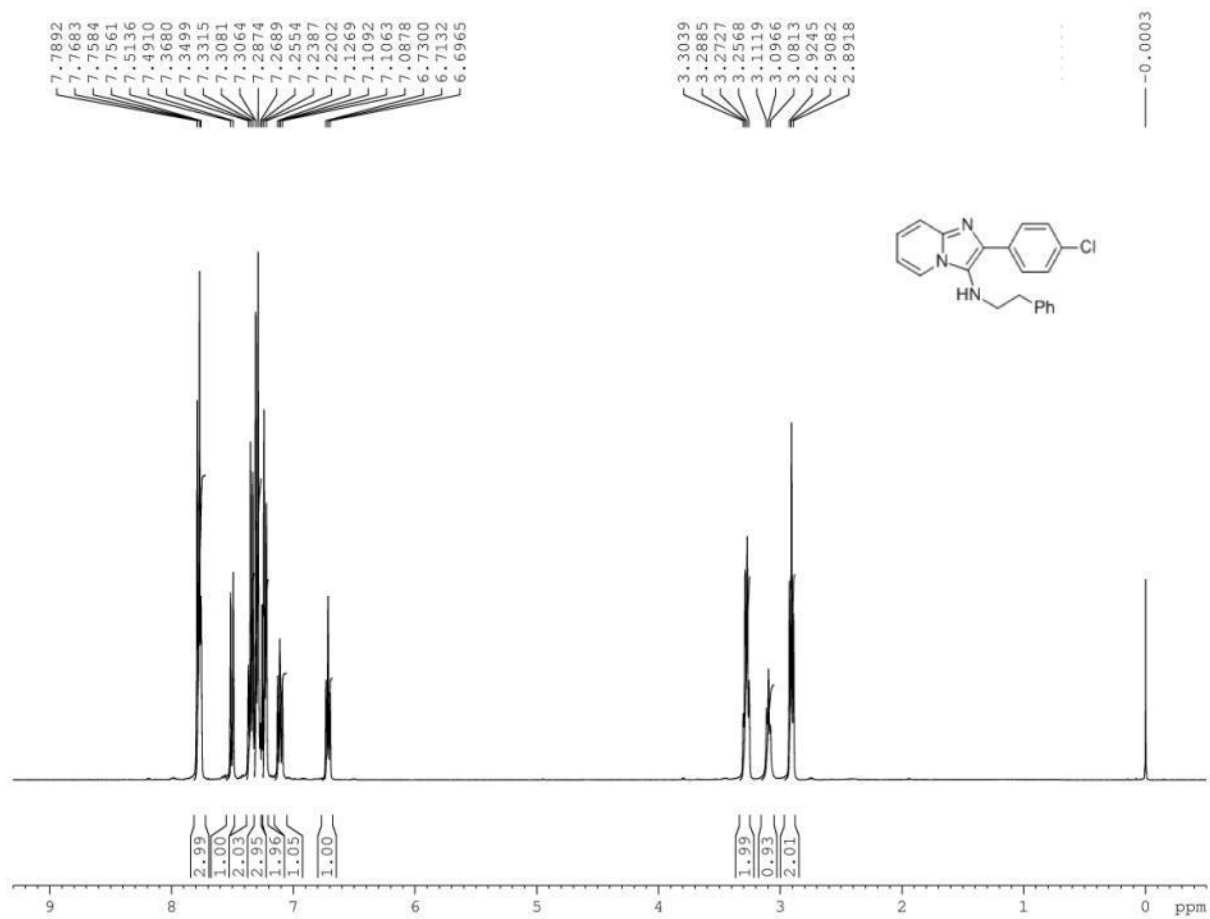

6a: <sup>13</sup>C NMR

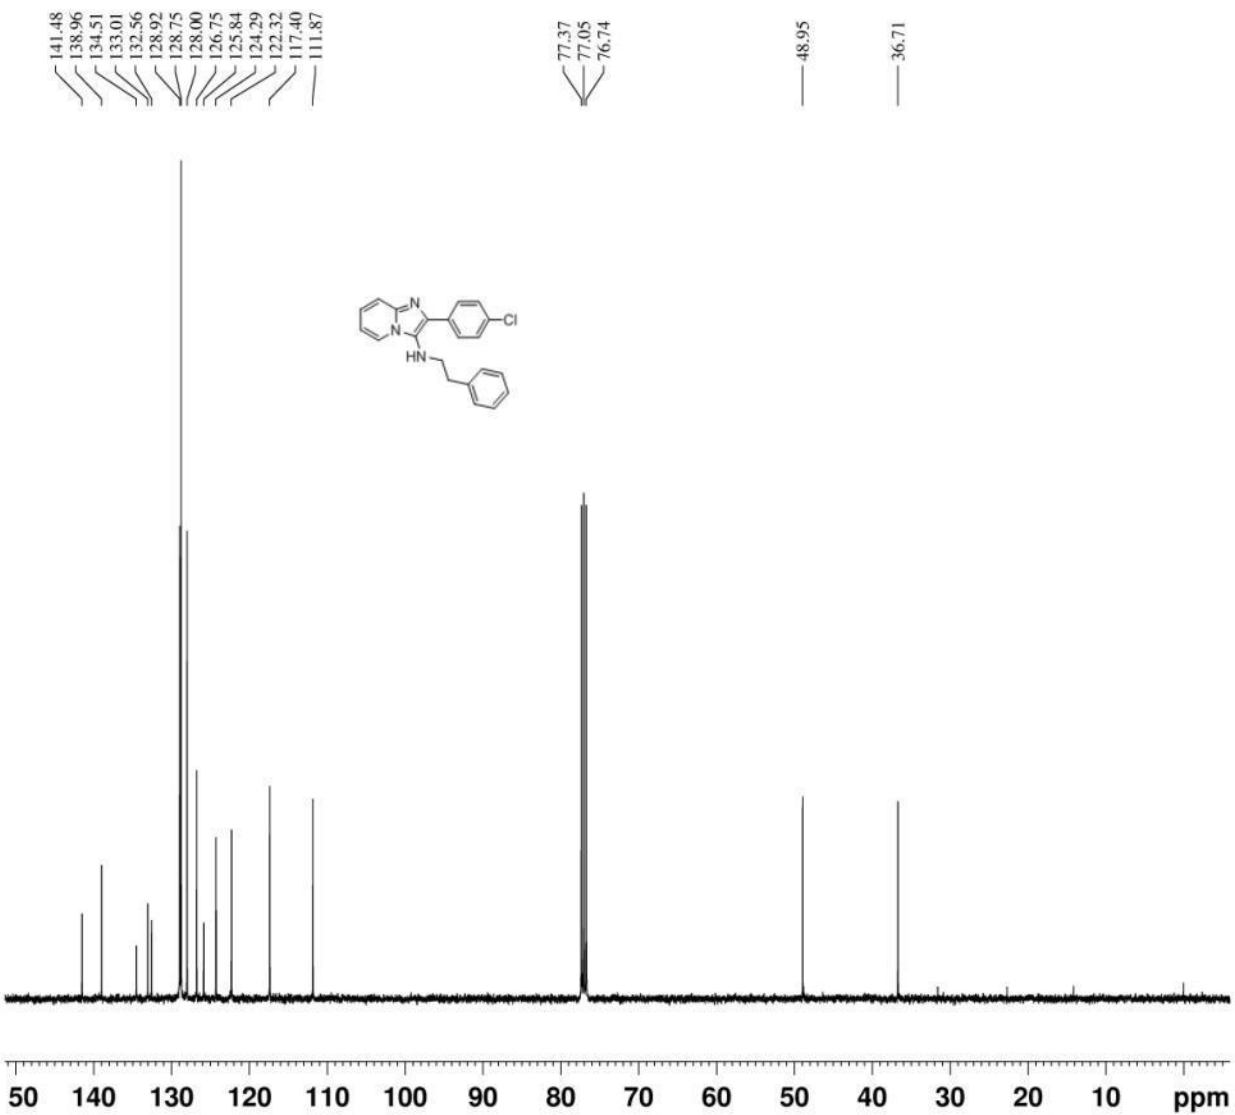

**6b: <sup>1</sup>H NMR**

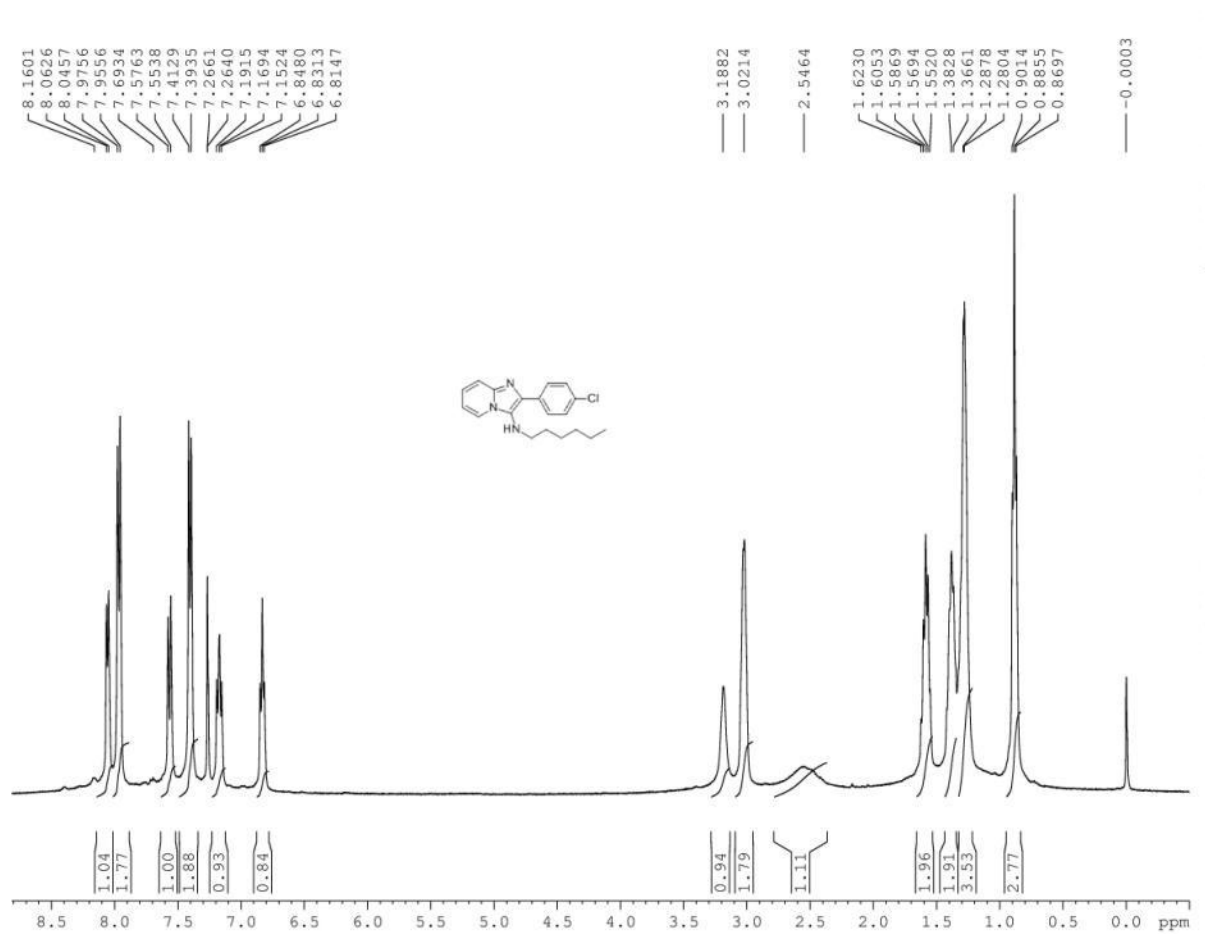

6b: <sup>13</sup>C NMR

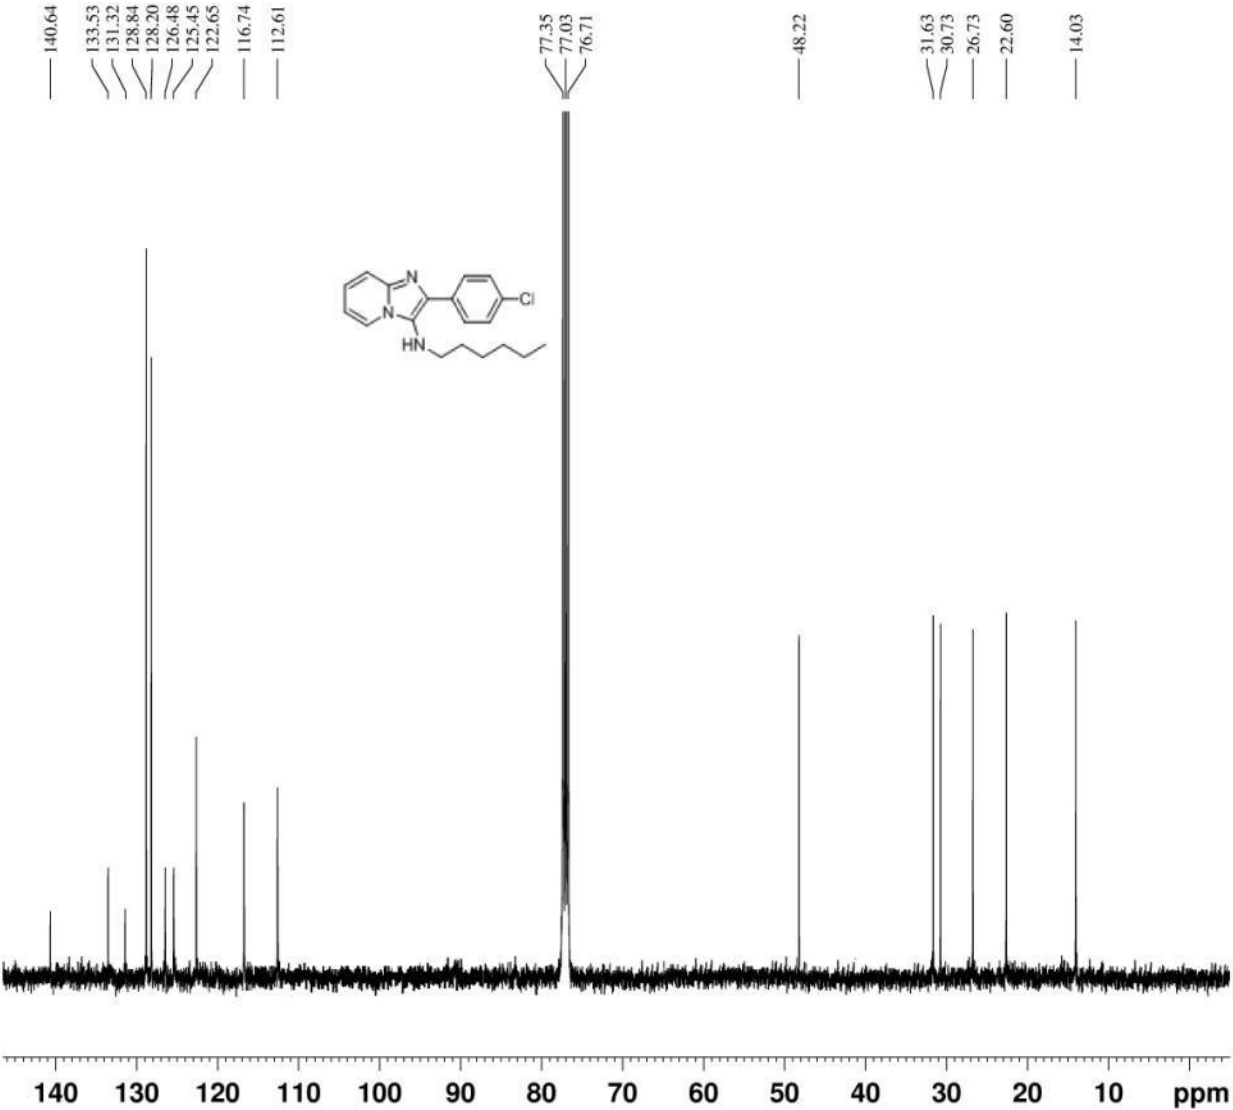

6c: <sup>1</sup>H NMR

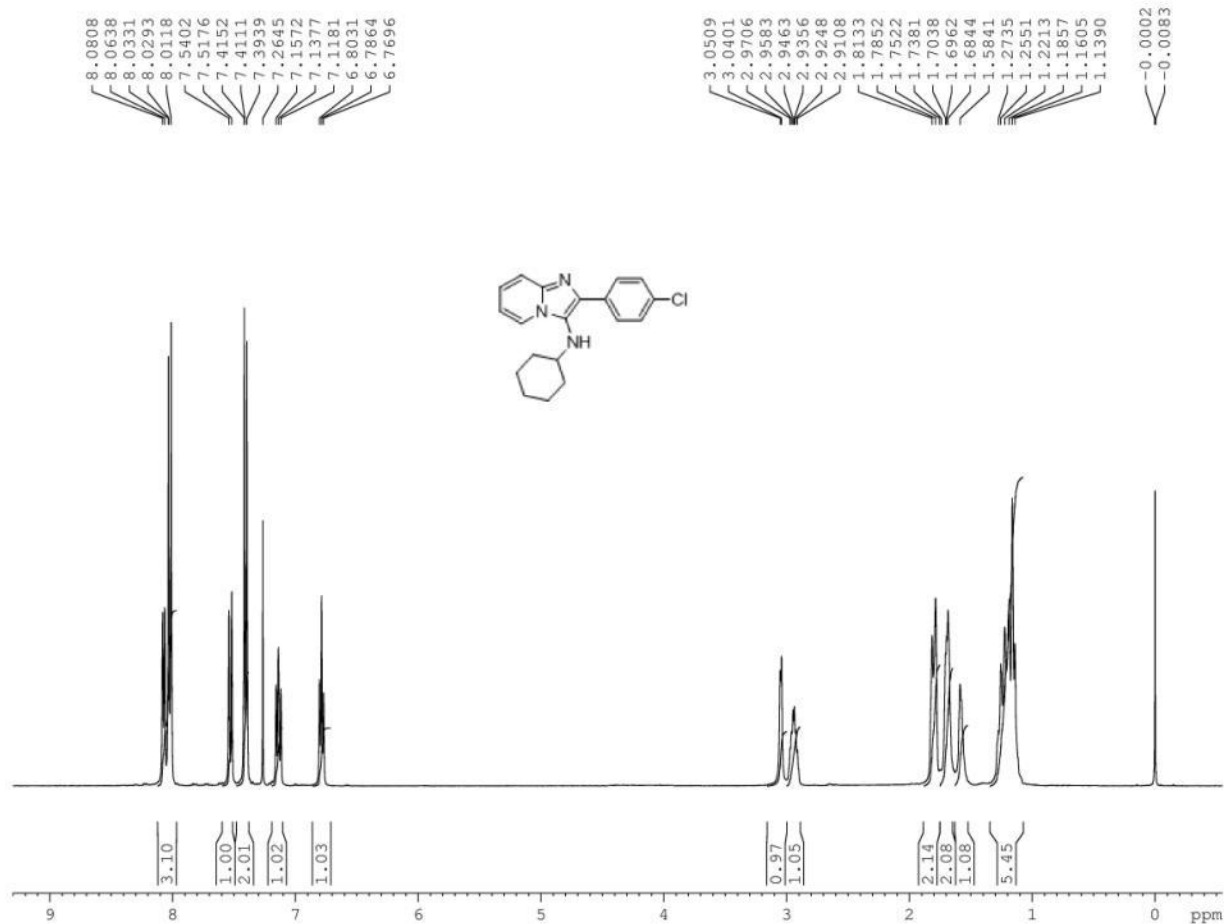



6c: <sup>13</sup>C NMR

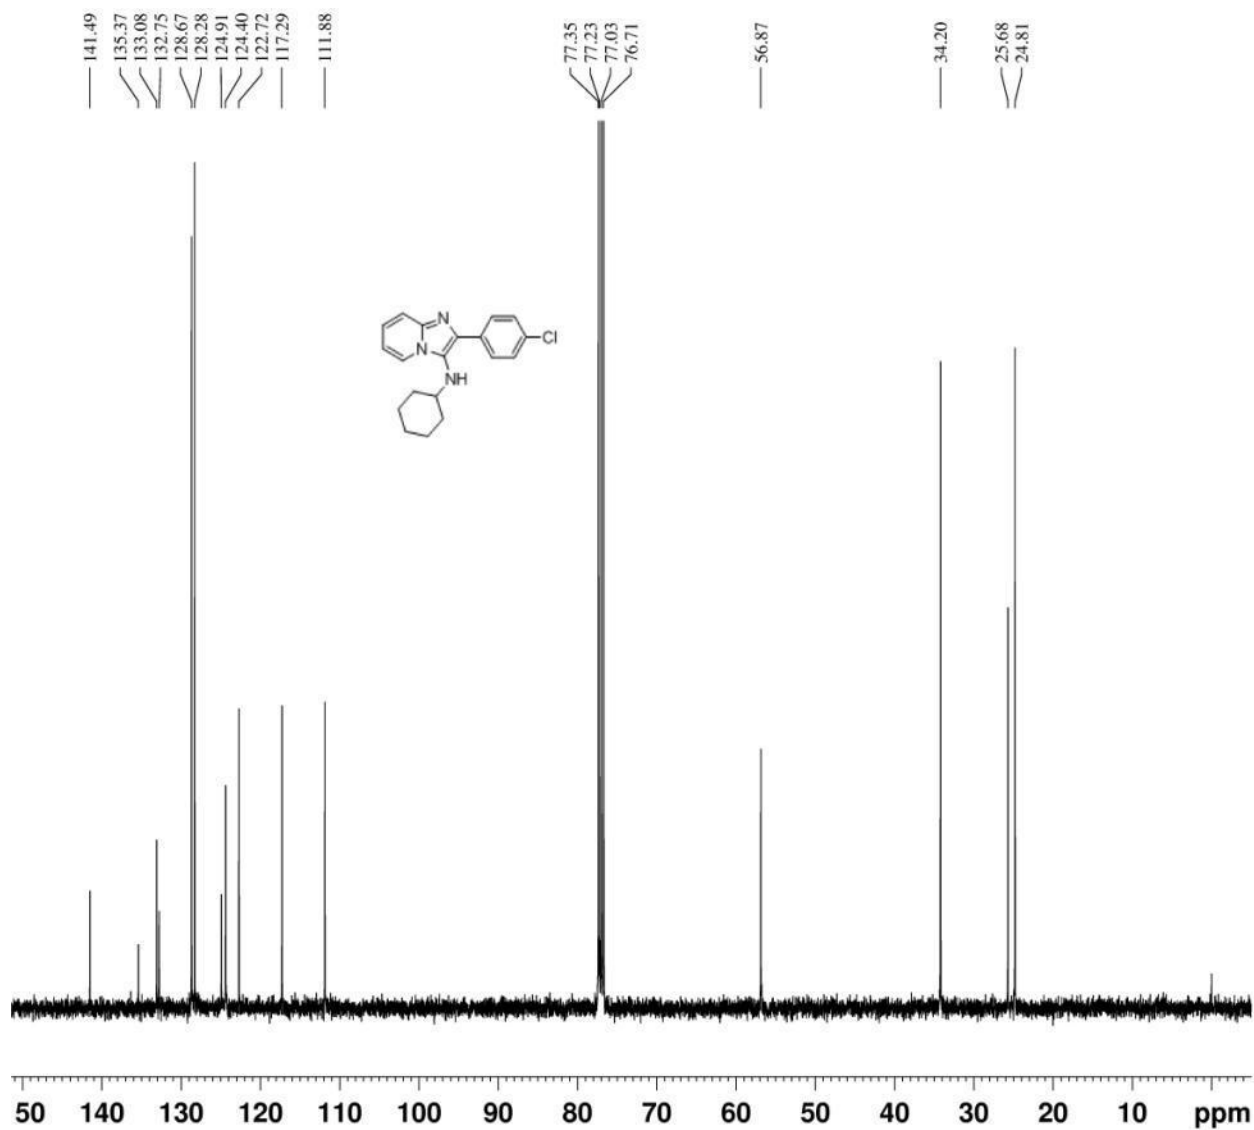

6d: <sup>1</sup>H NMR

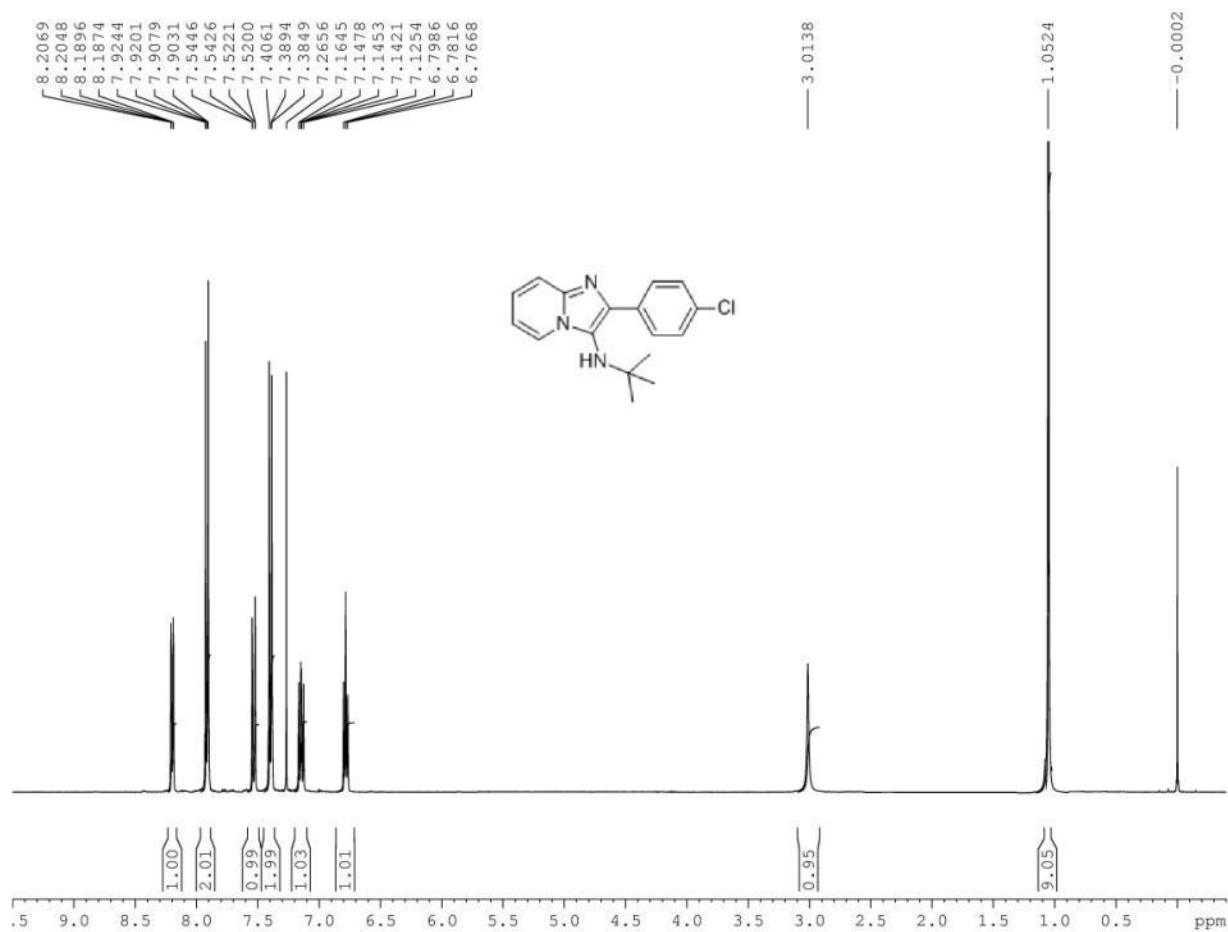

6d: <sup>13</sup>C NMR

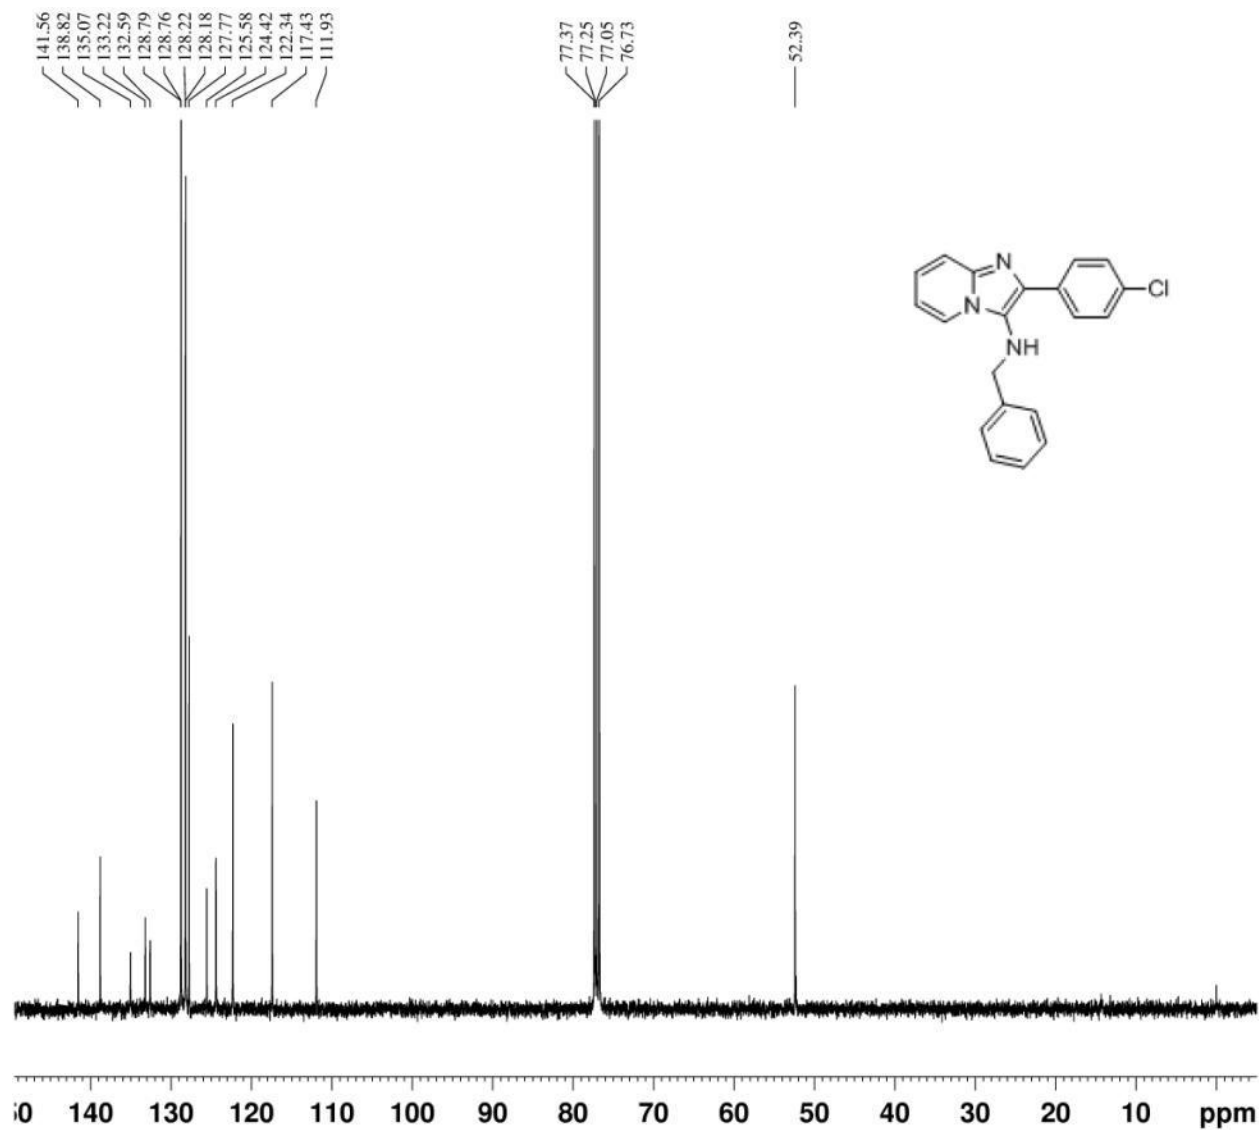

6e: <sup>1</sup>H NMR

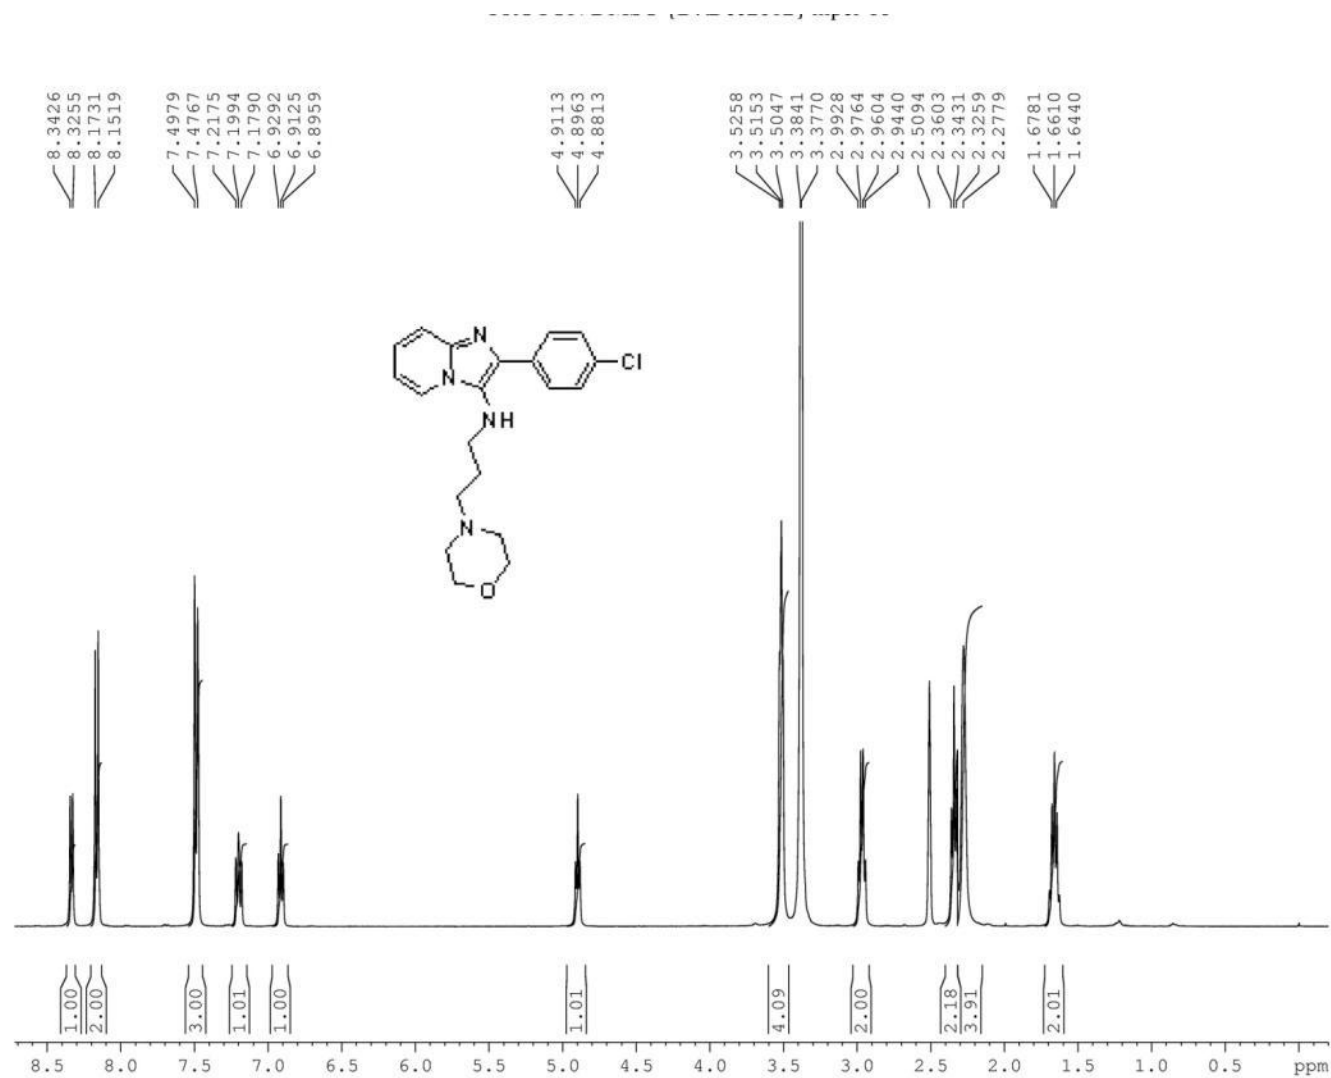

6e: <sup>13</sup>C NMR

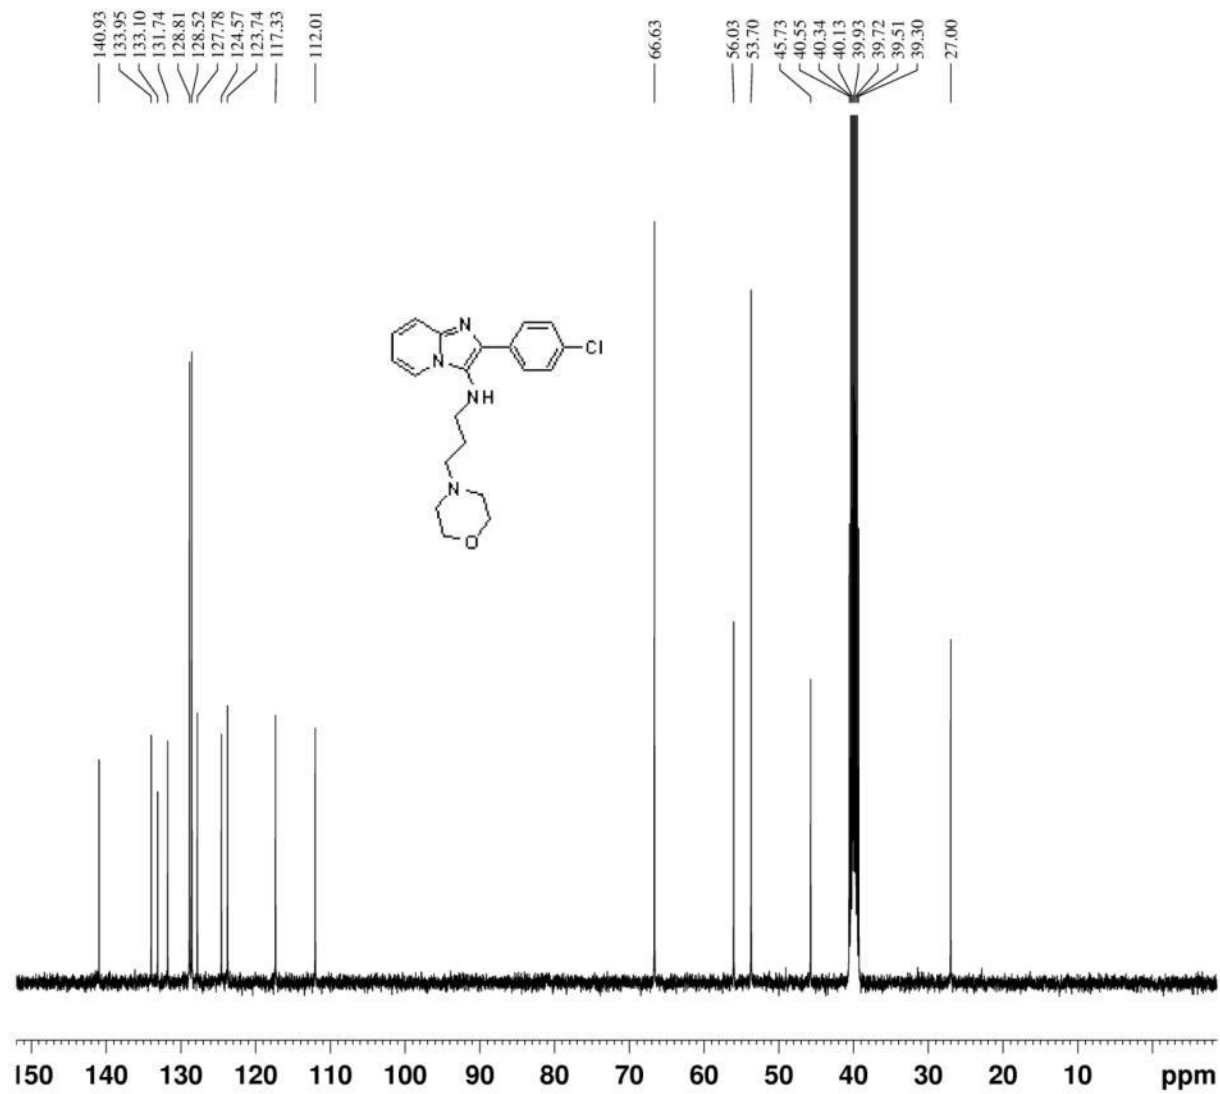

6f: <sup>1</sup>H NMR

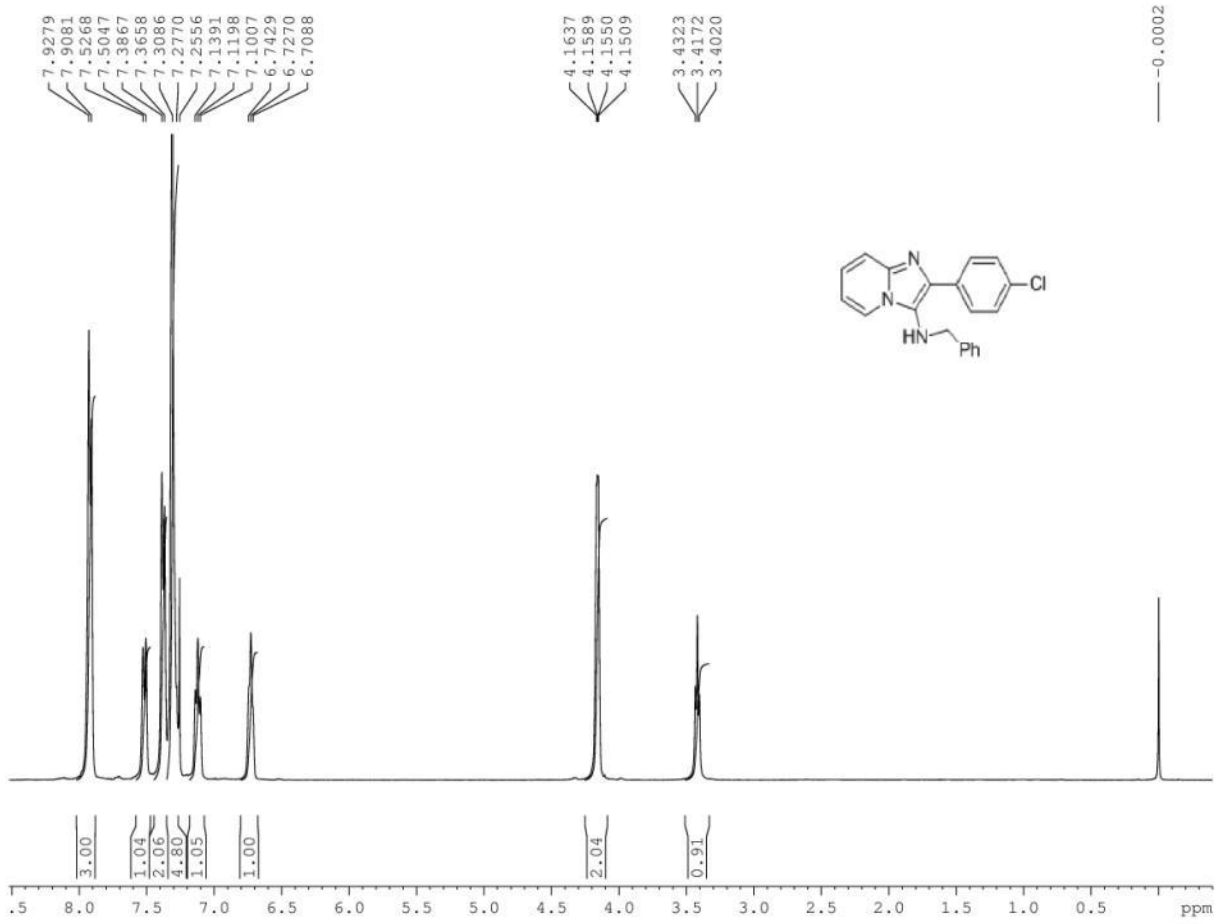

6f: <sup>13</sup>C NMR

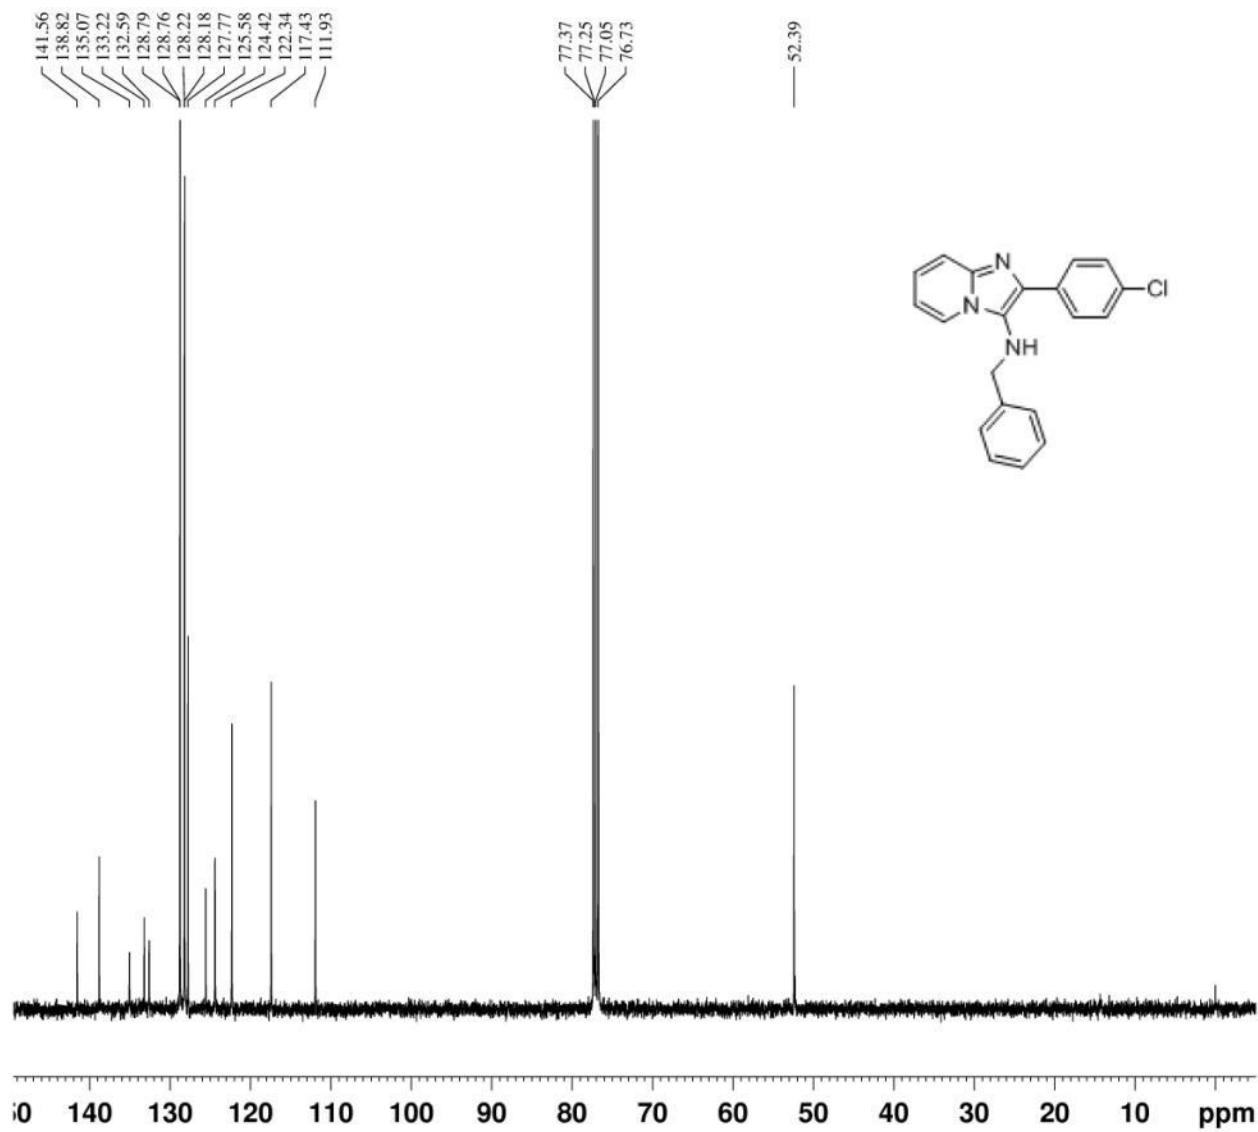

6g: <sup>1</sup>H NMR

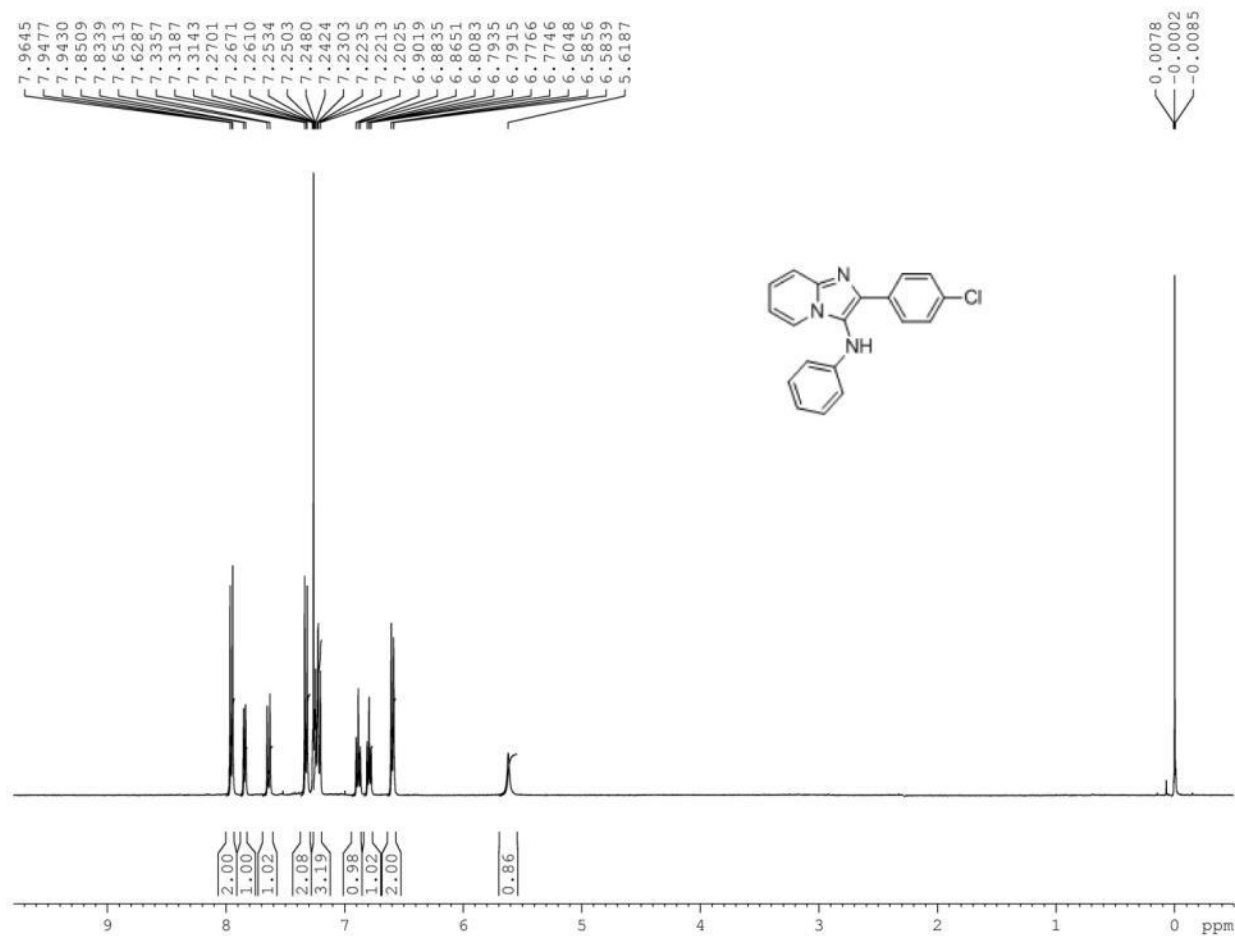



6g: <sup>13</sup>C NMR

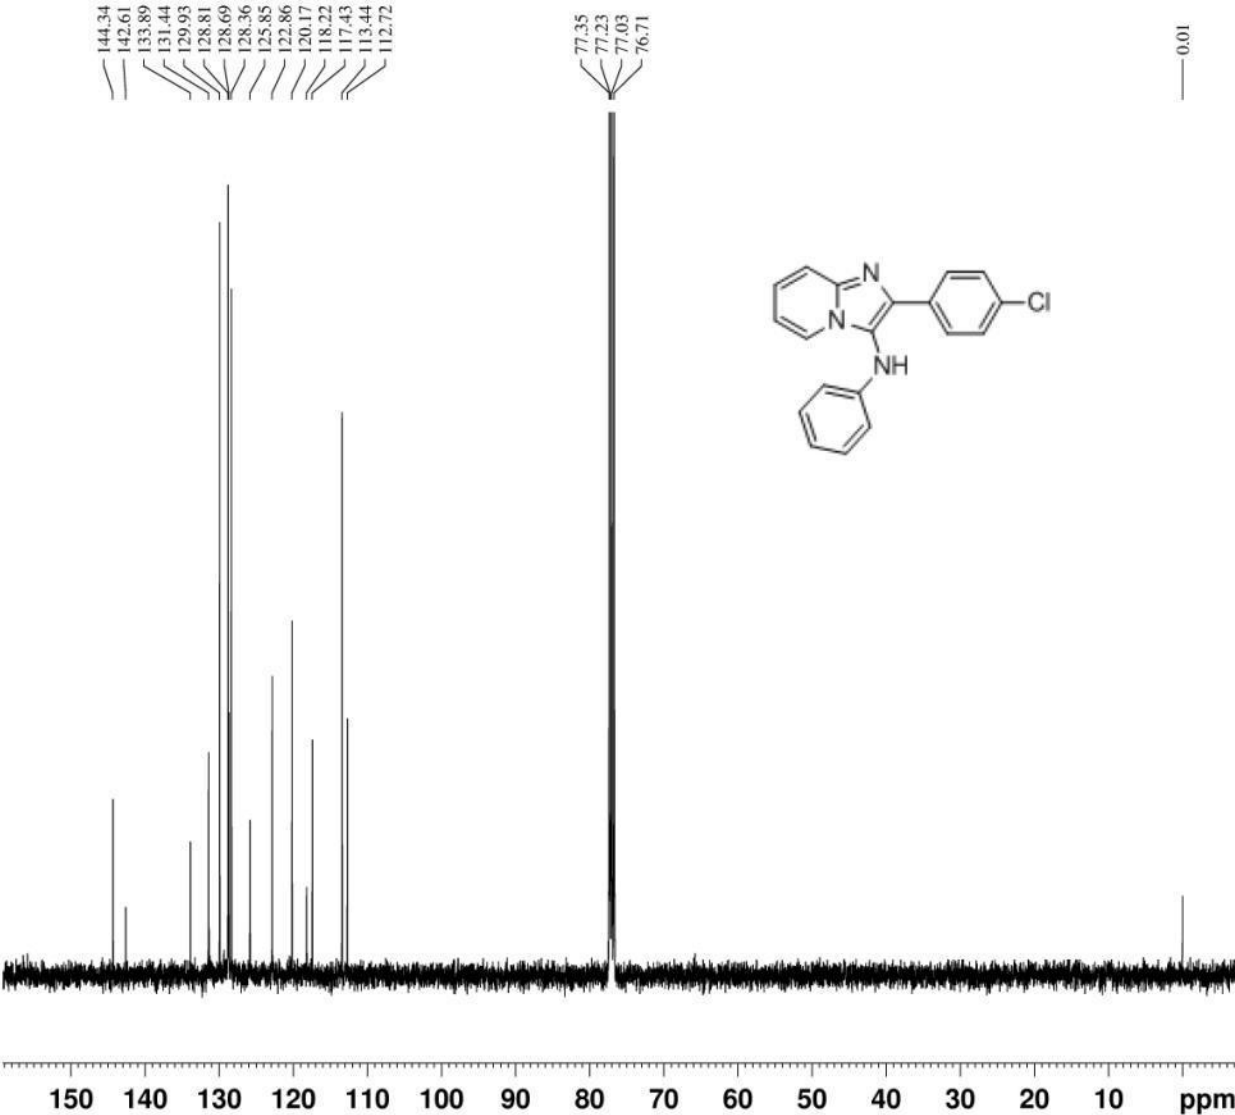

6h: <sup>1</sup>H NMR

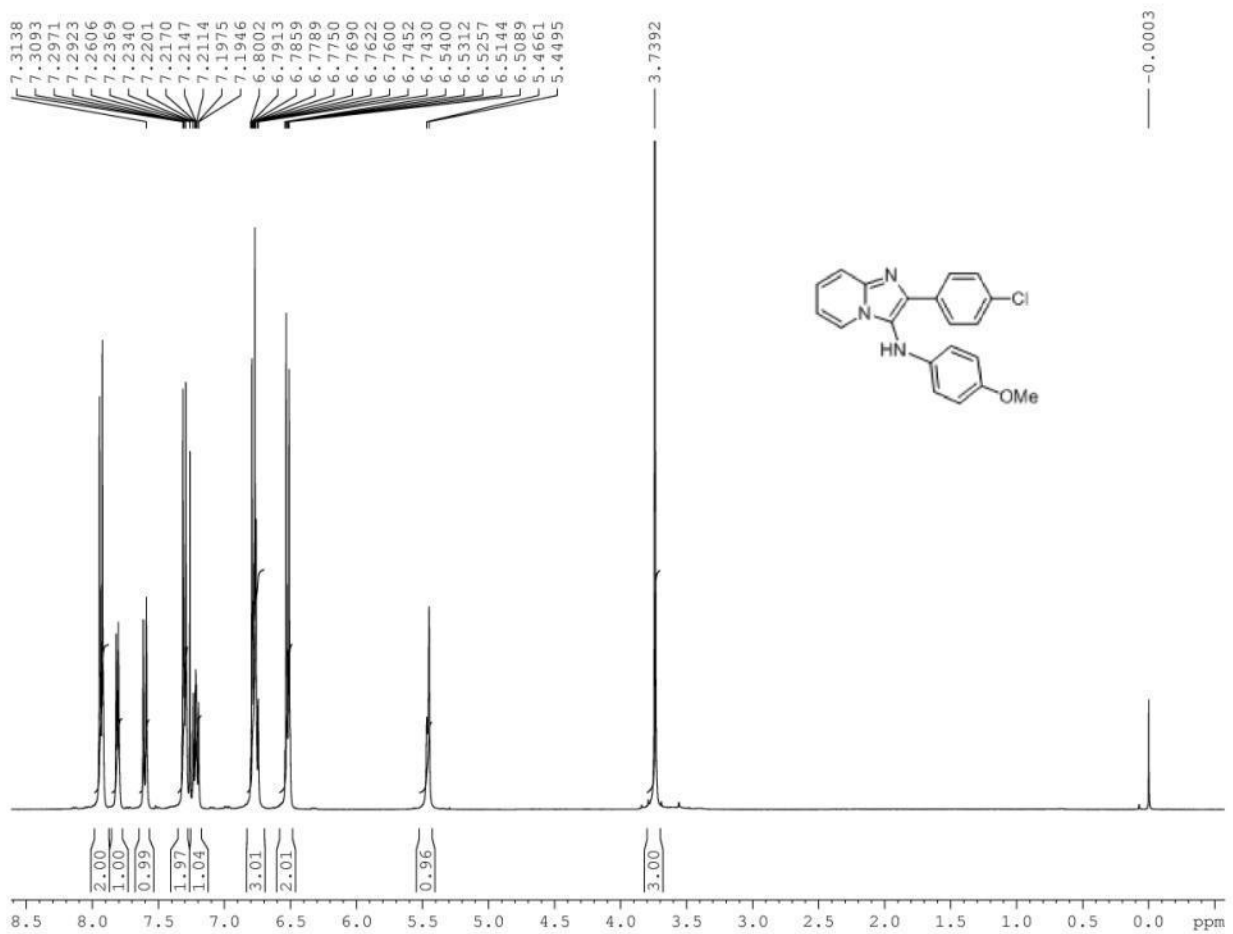

**6h:  $^{13}\text{C}$  NMR**

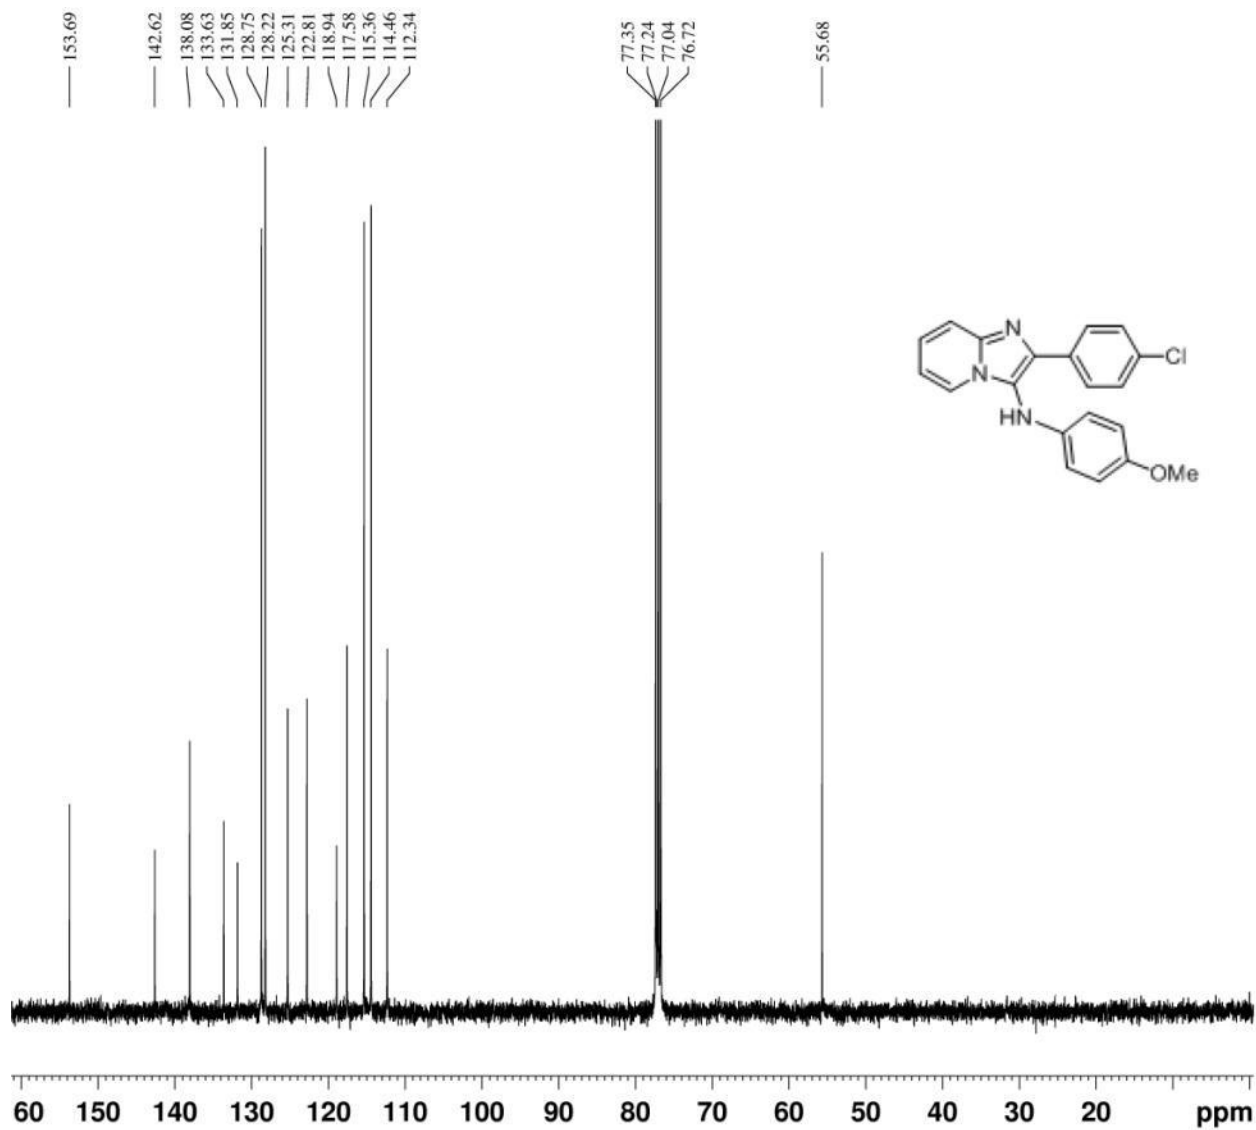

6i: <sup>1</sup>H NMR

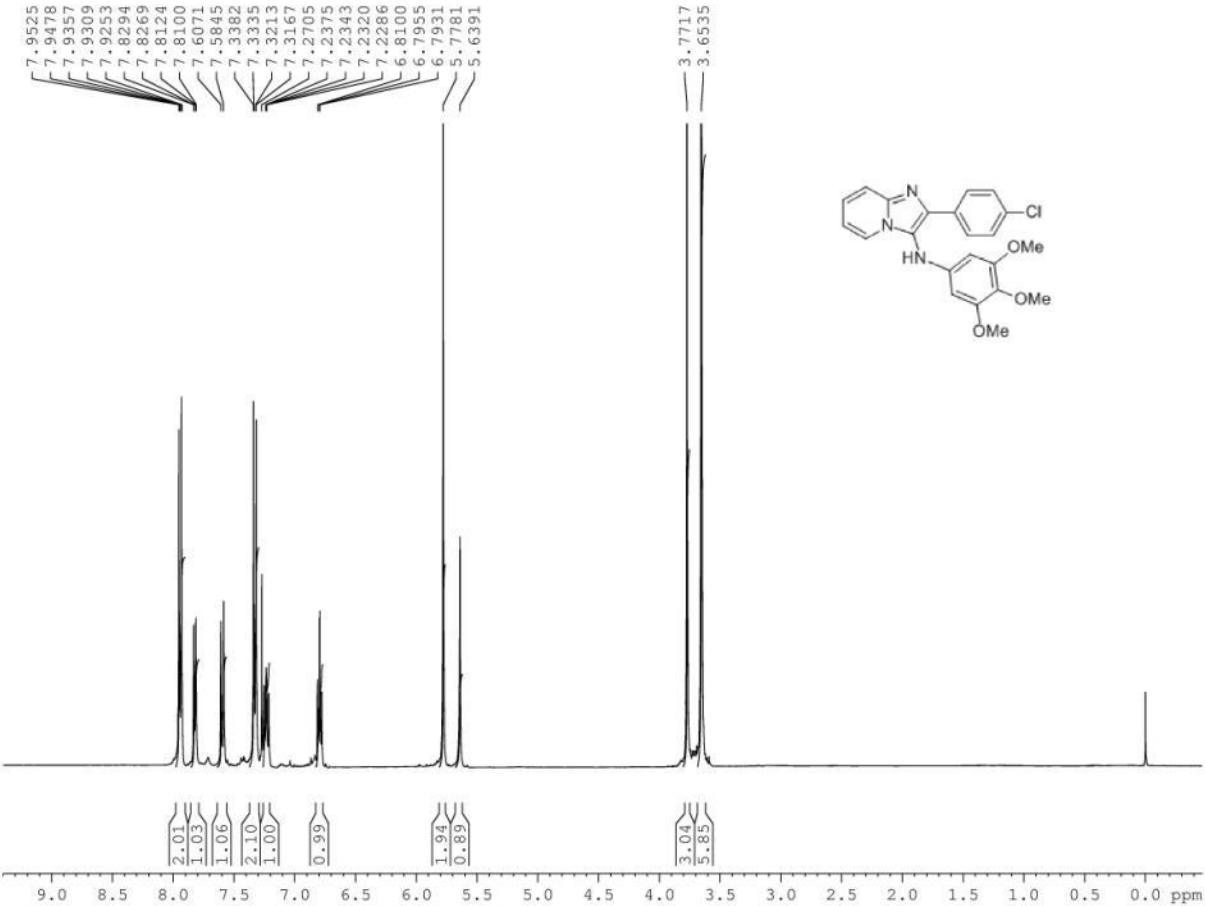

**6i:  $^{13}\text{C}$  NMR**

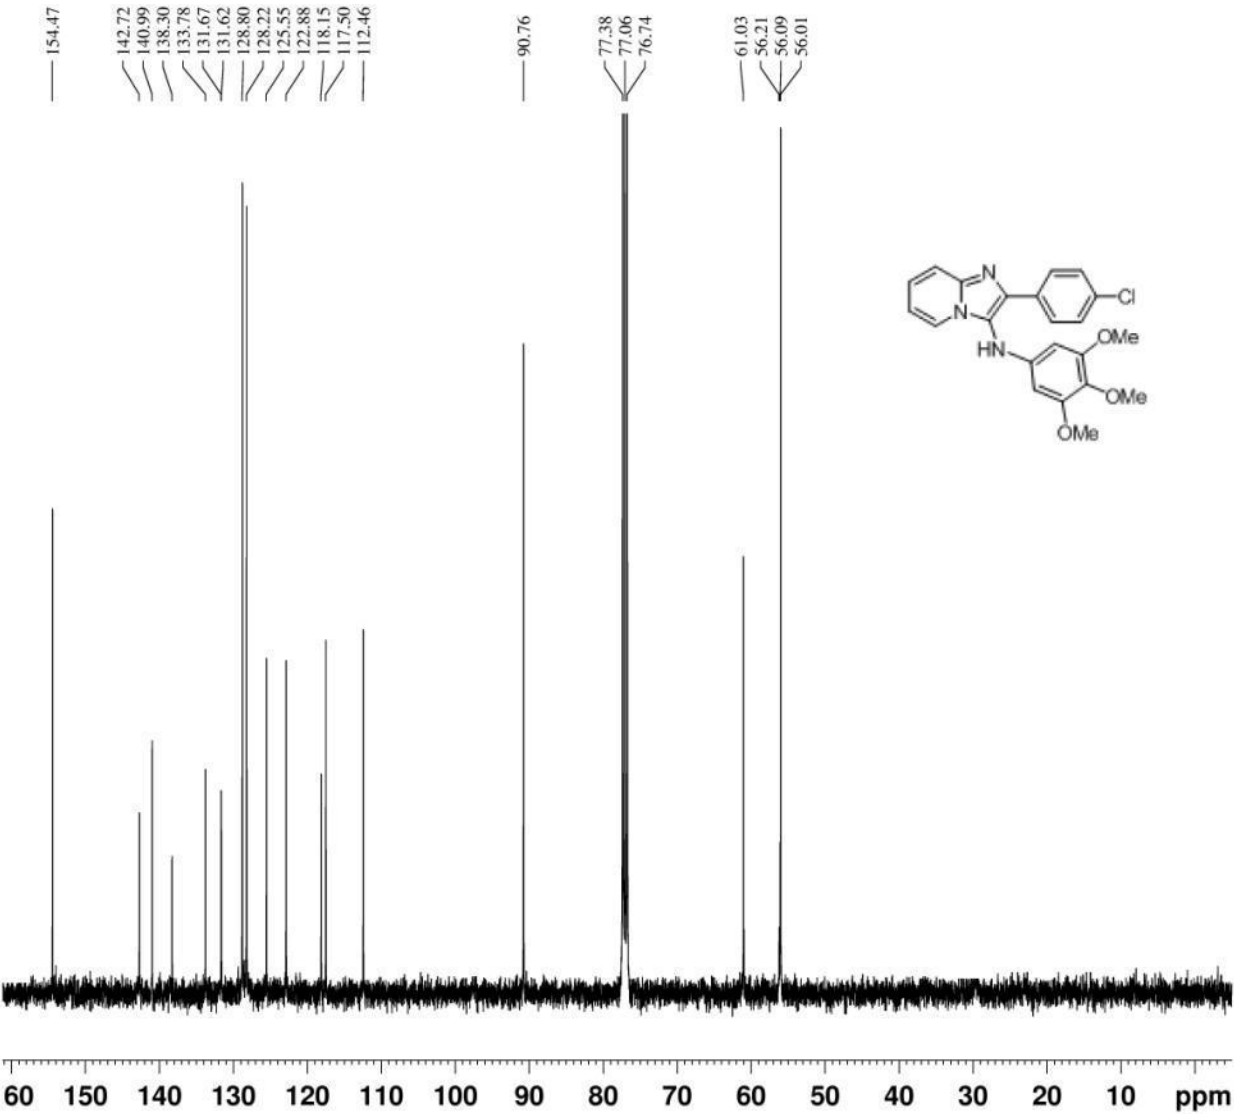

6j: <sup>1</sup>H NMR

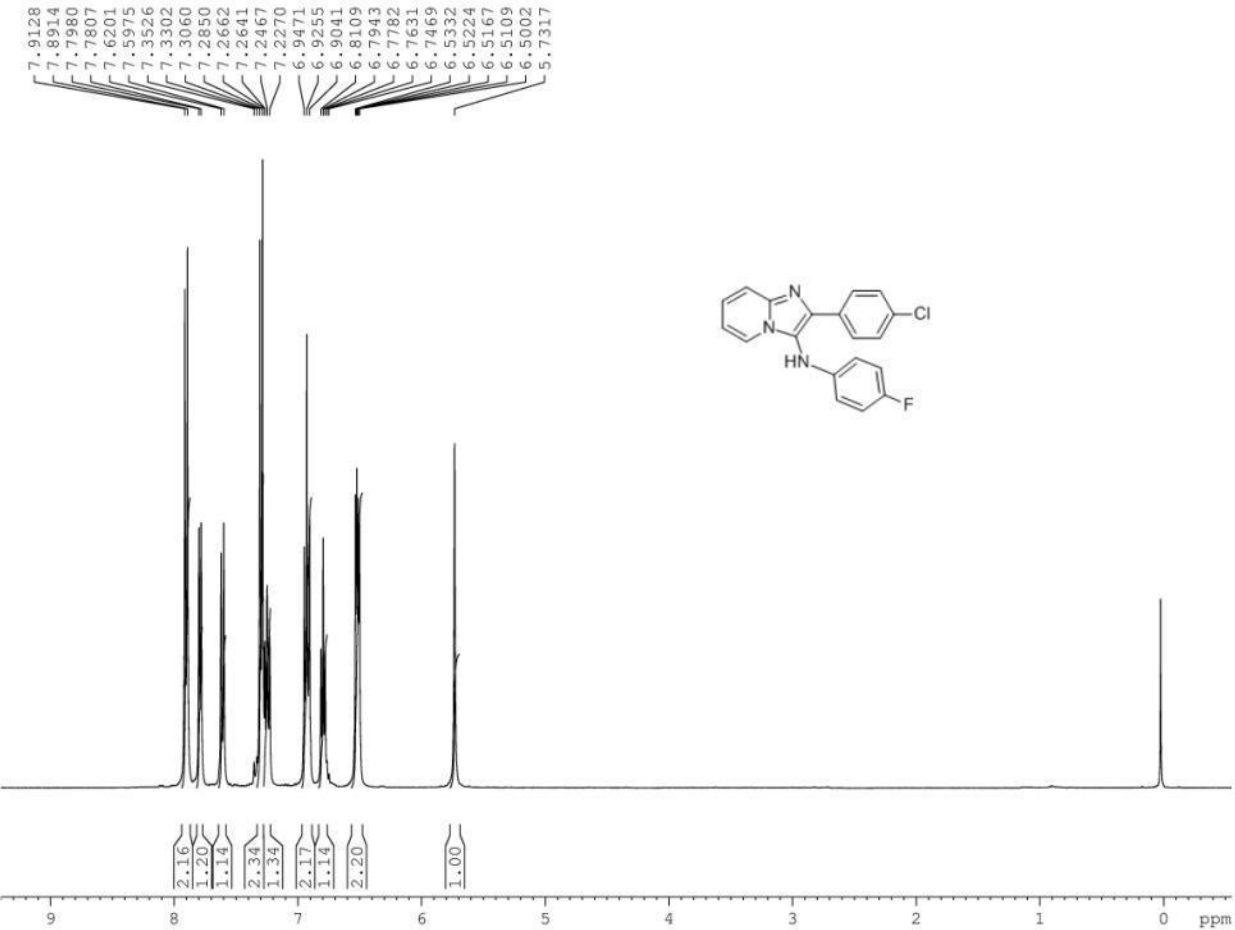

6j: <sup>13</sup>C NMR

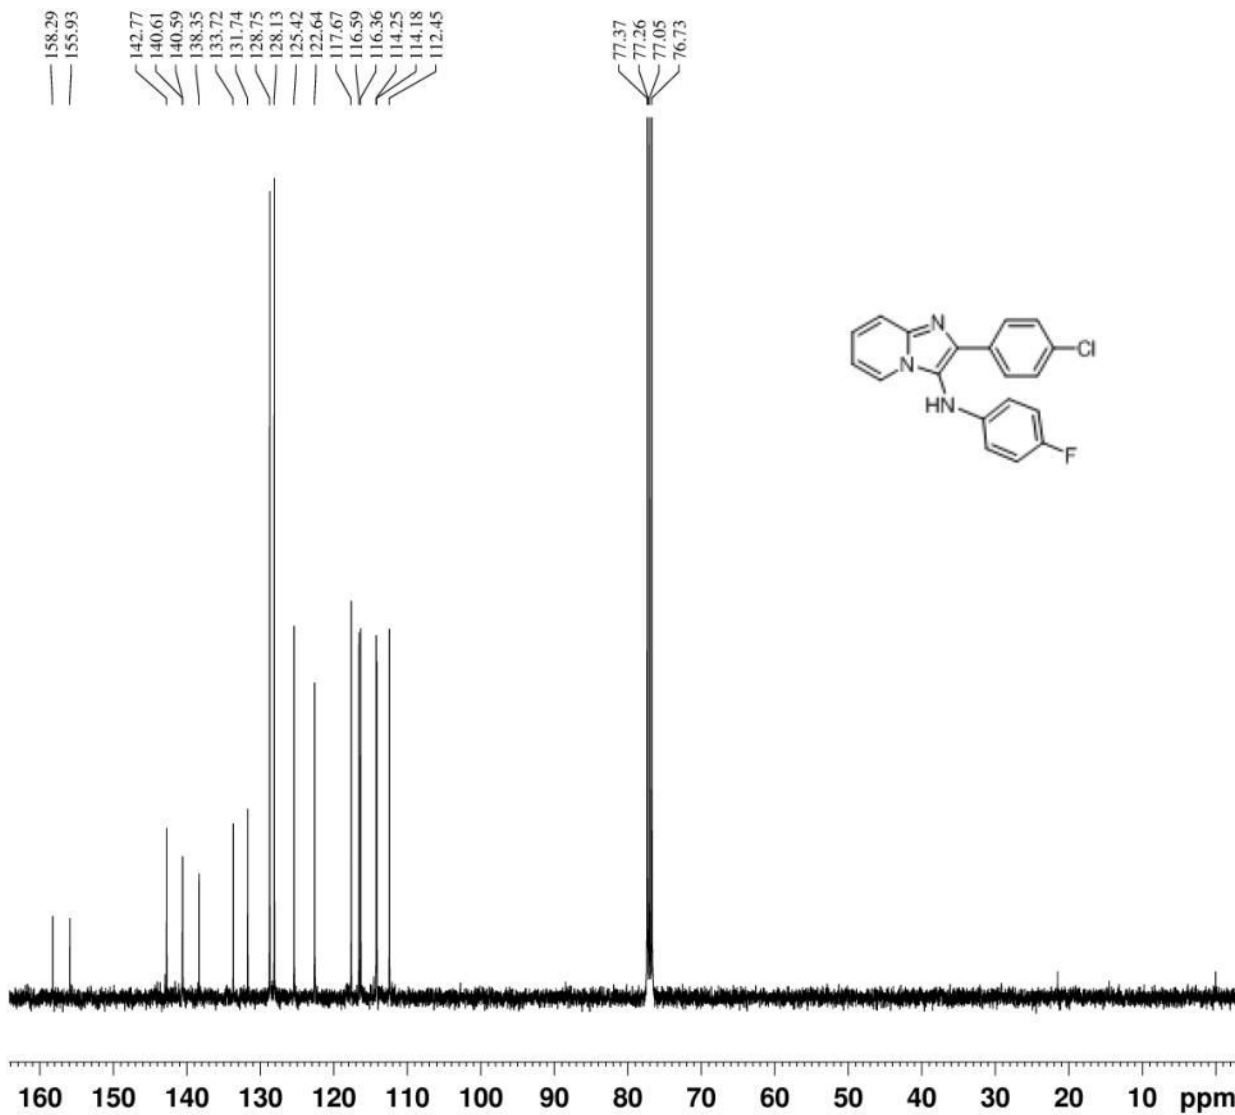

**6k: <sup>1</sup>H NMR**

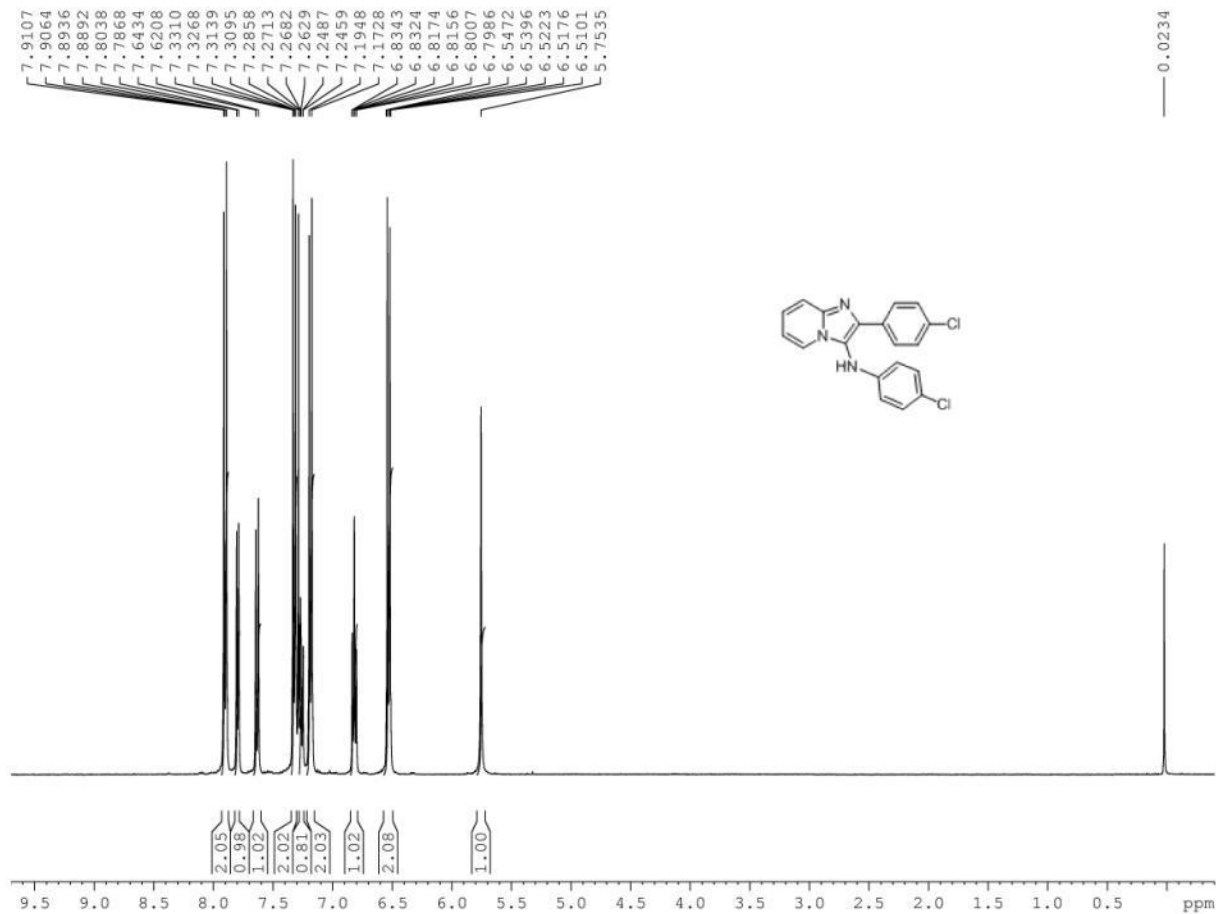



6k: <sup>13</sup>C NMR

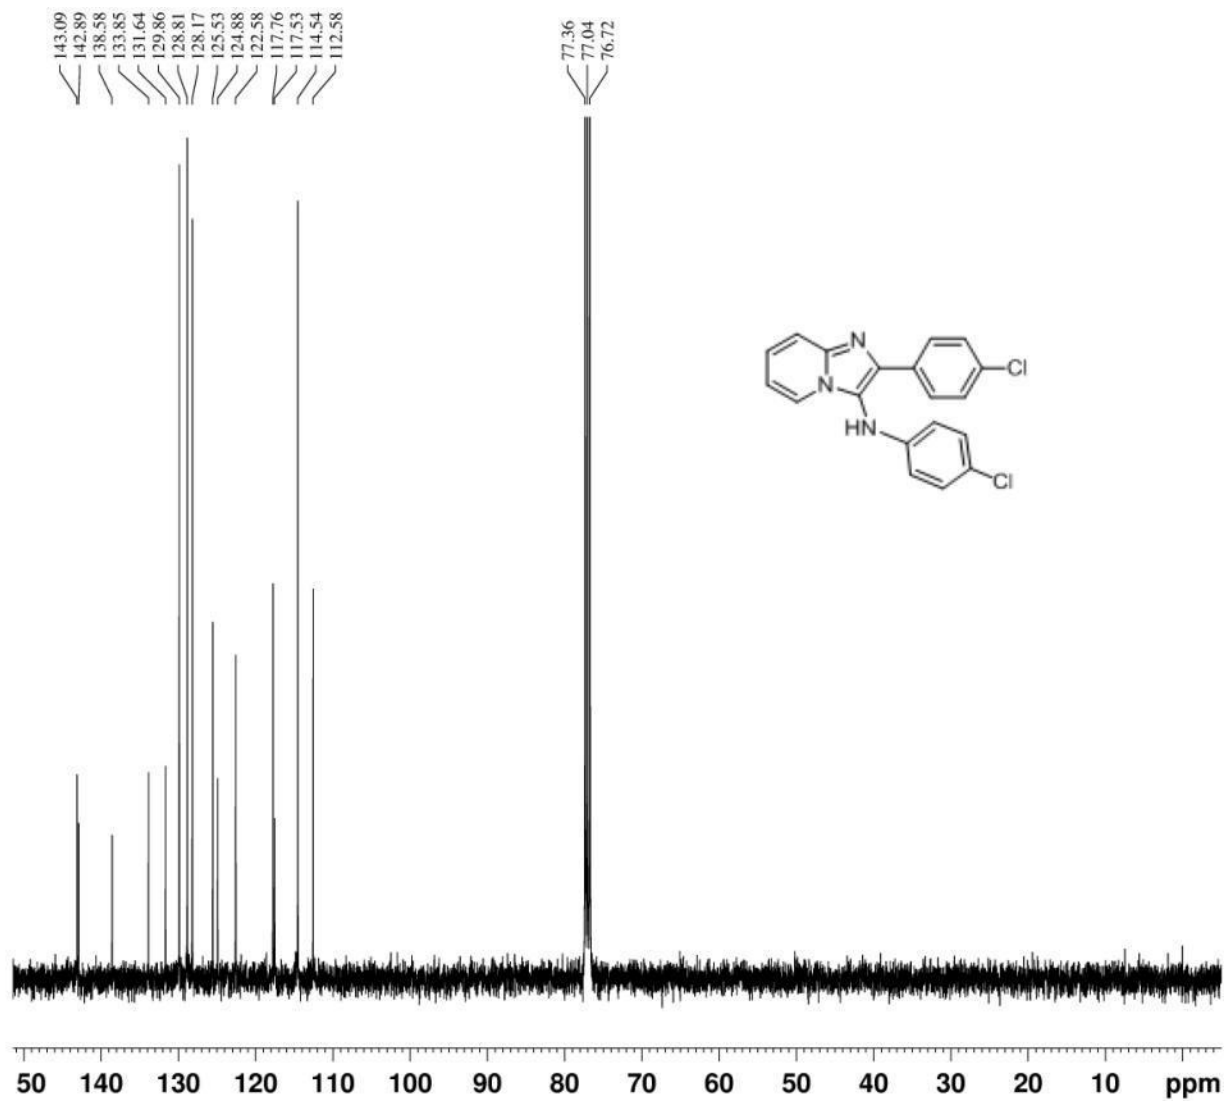

**6l:  $^1\text{H}$  NMR**

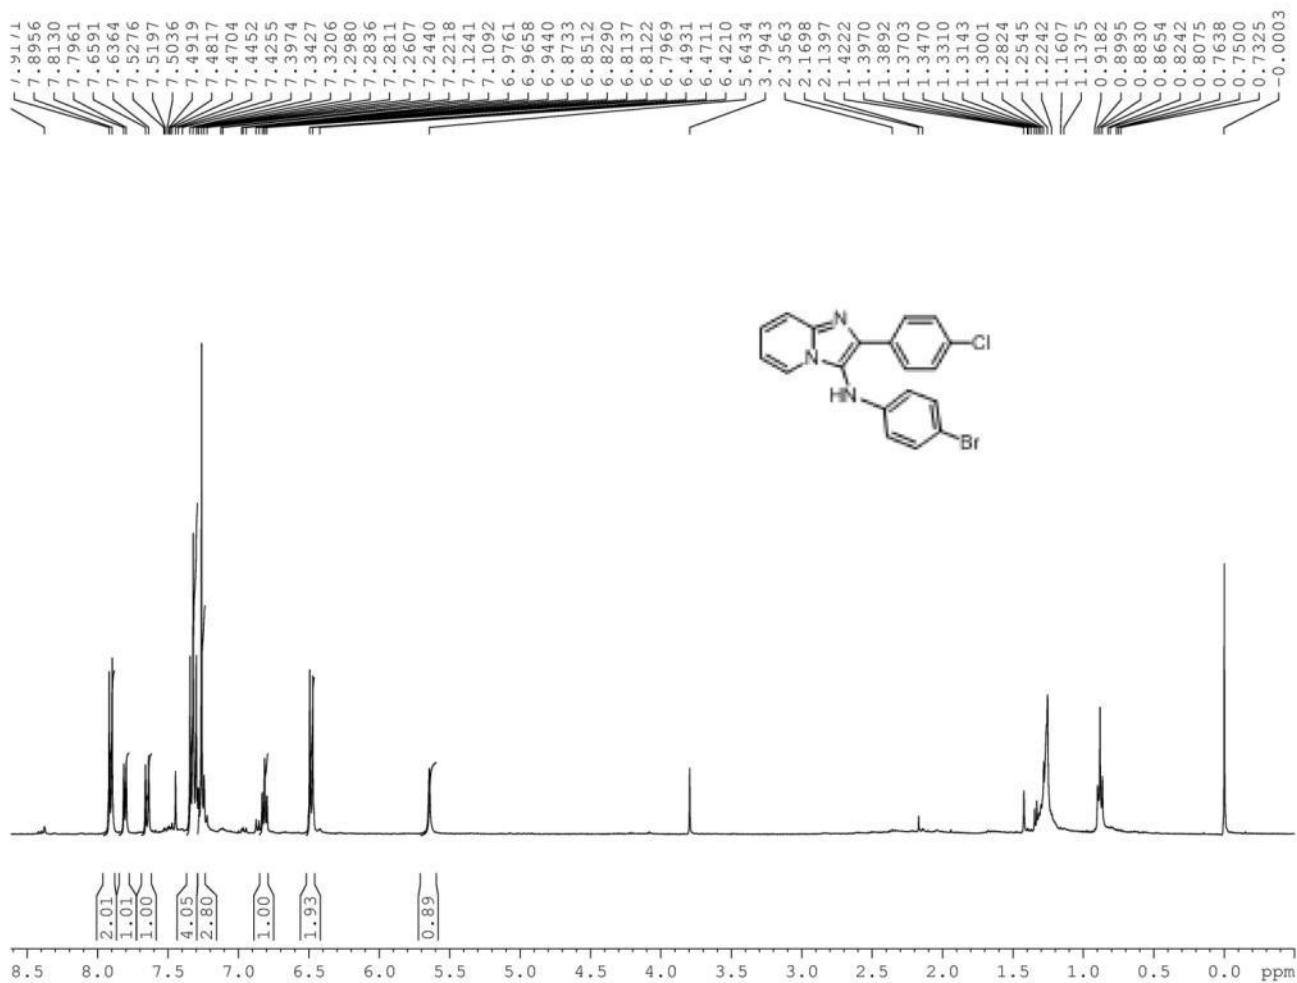

6l: <sup>13</sup>C NMR

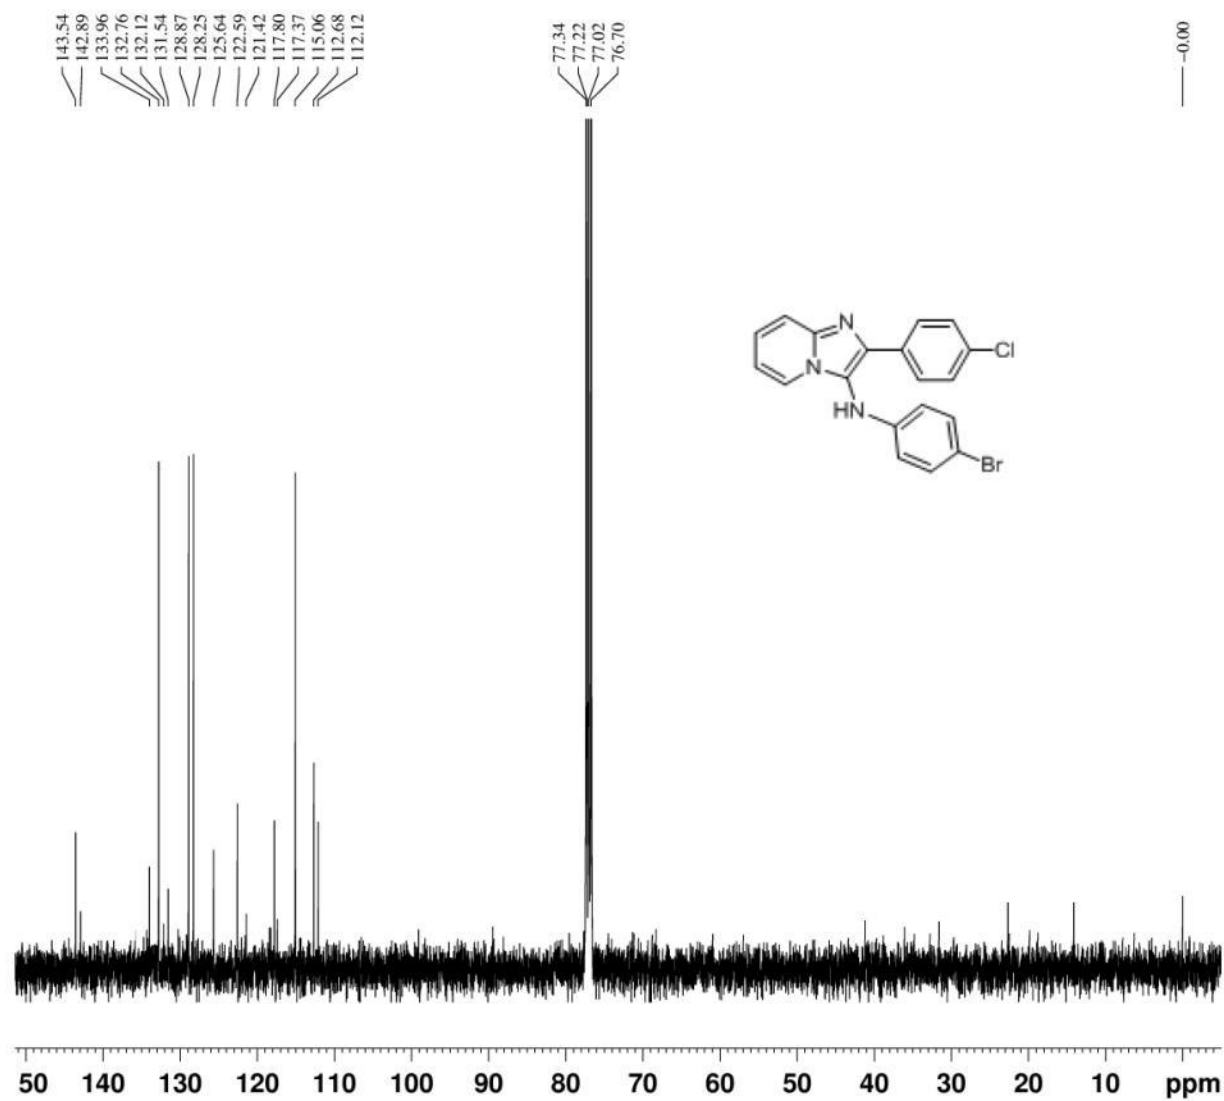

6m: <sup>1</sup>H NMR

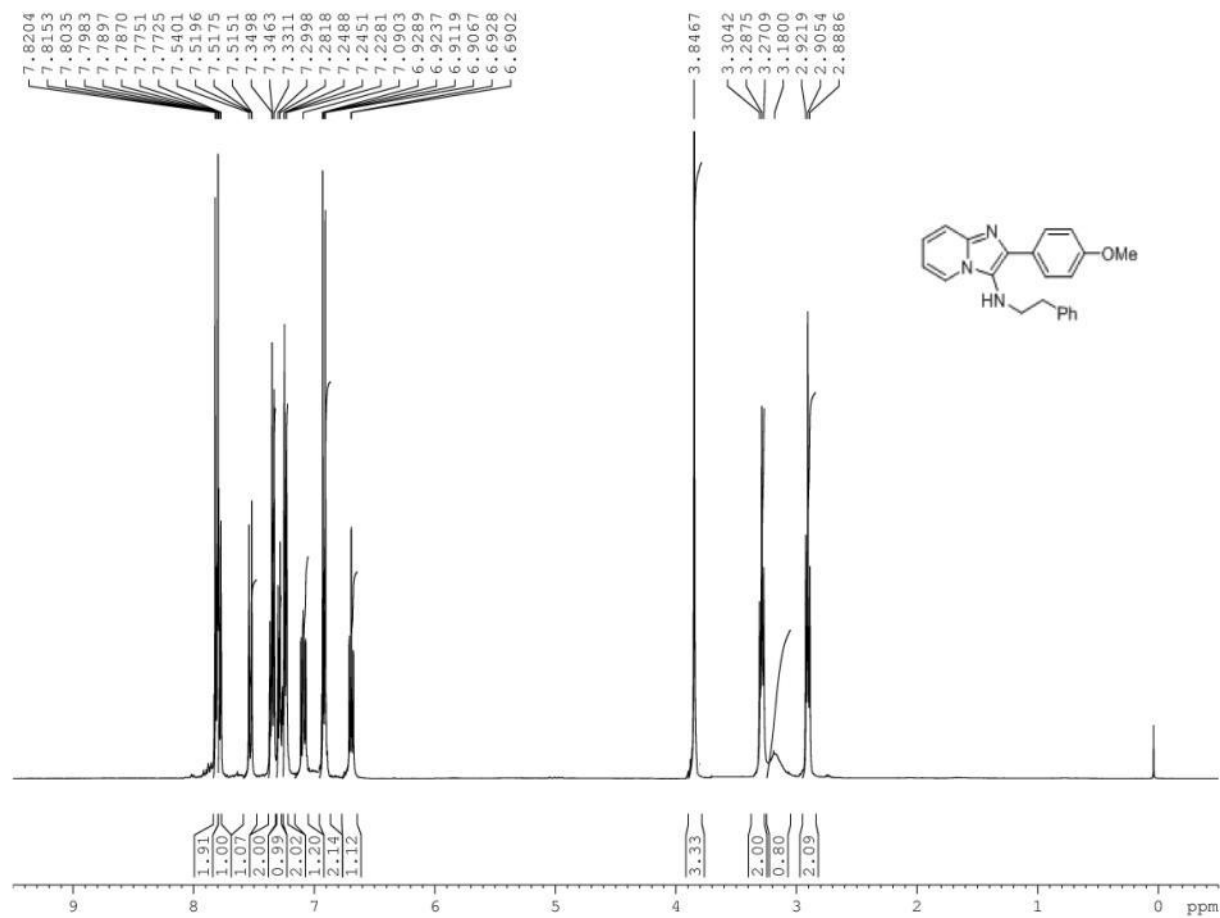

6m: <sup>13</sup>C NMR

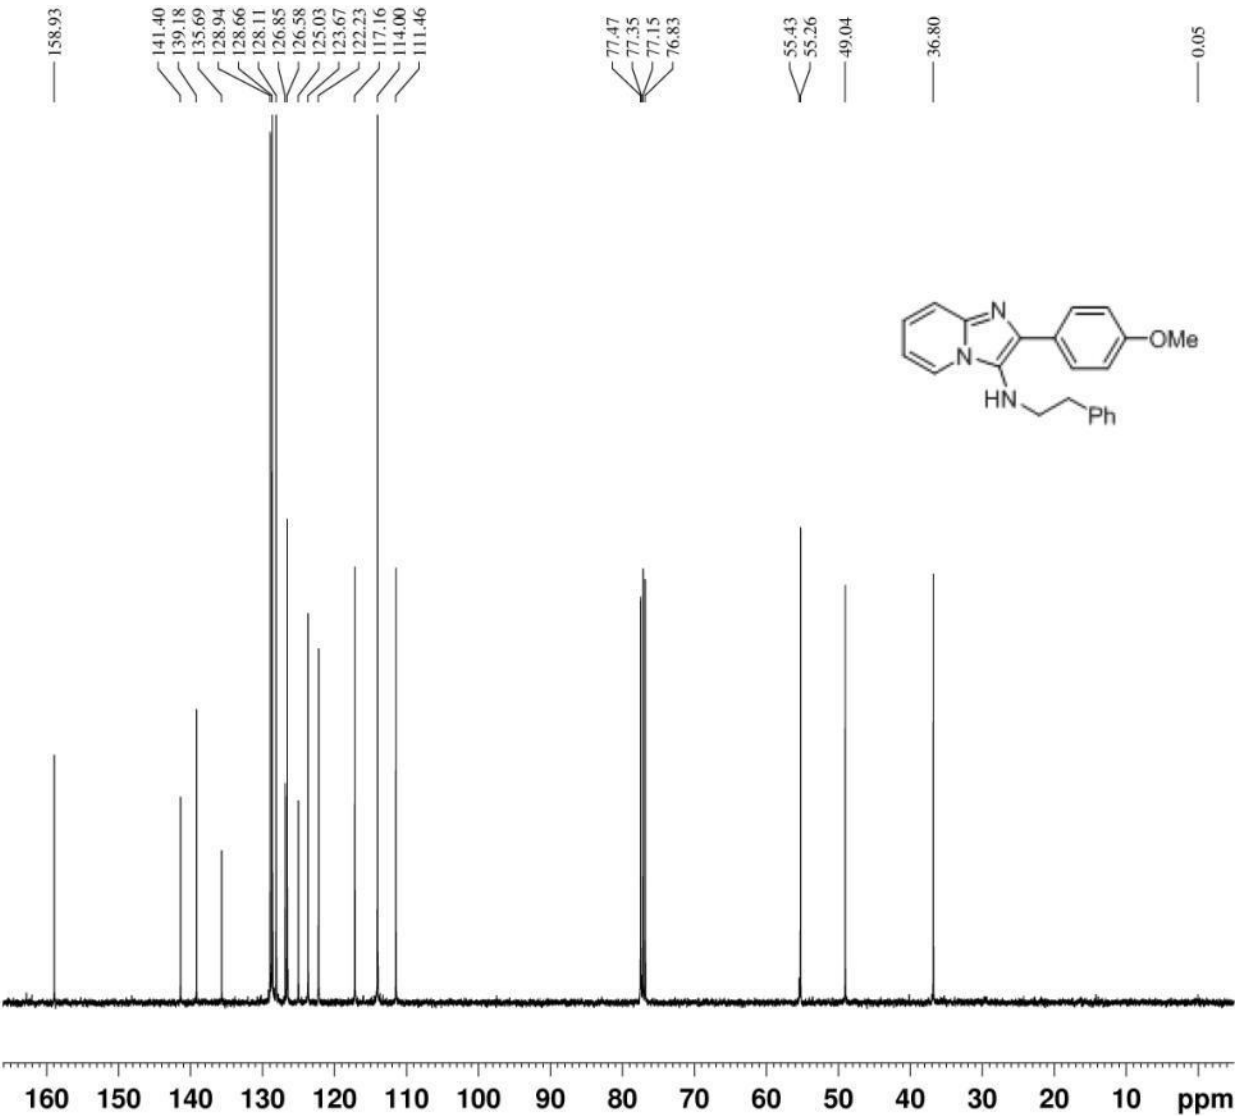

6n: <sup>1</sup>H NMR

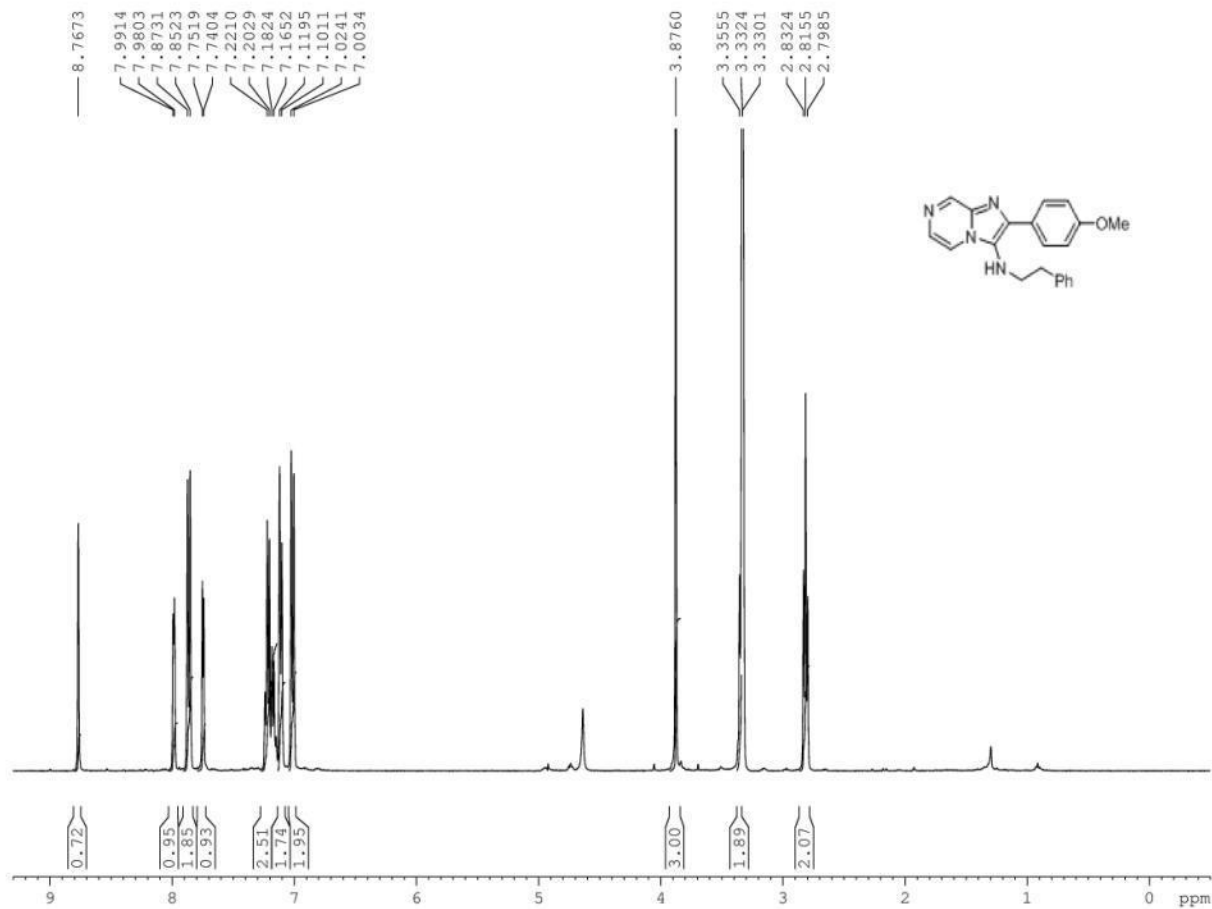

6n: <sup>13</sup>C NMR

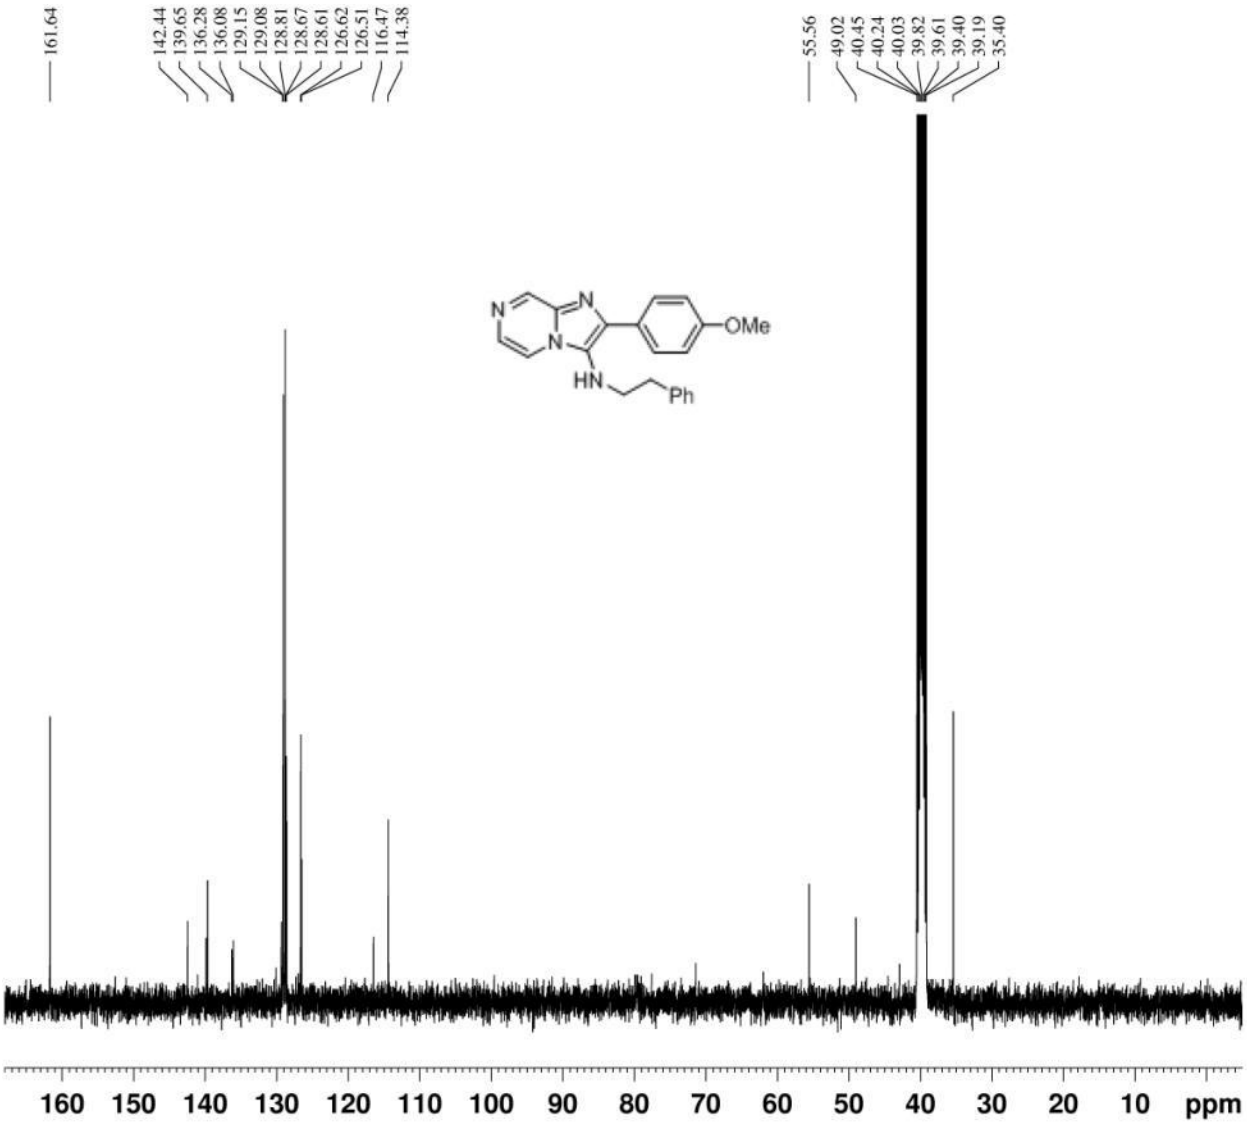

NMR Spectra of Compounds (7a-o)

7a: <sup>1</sup>H NMR

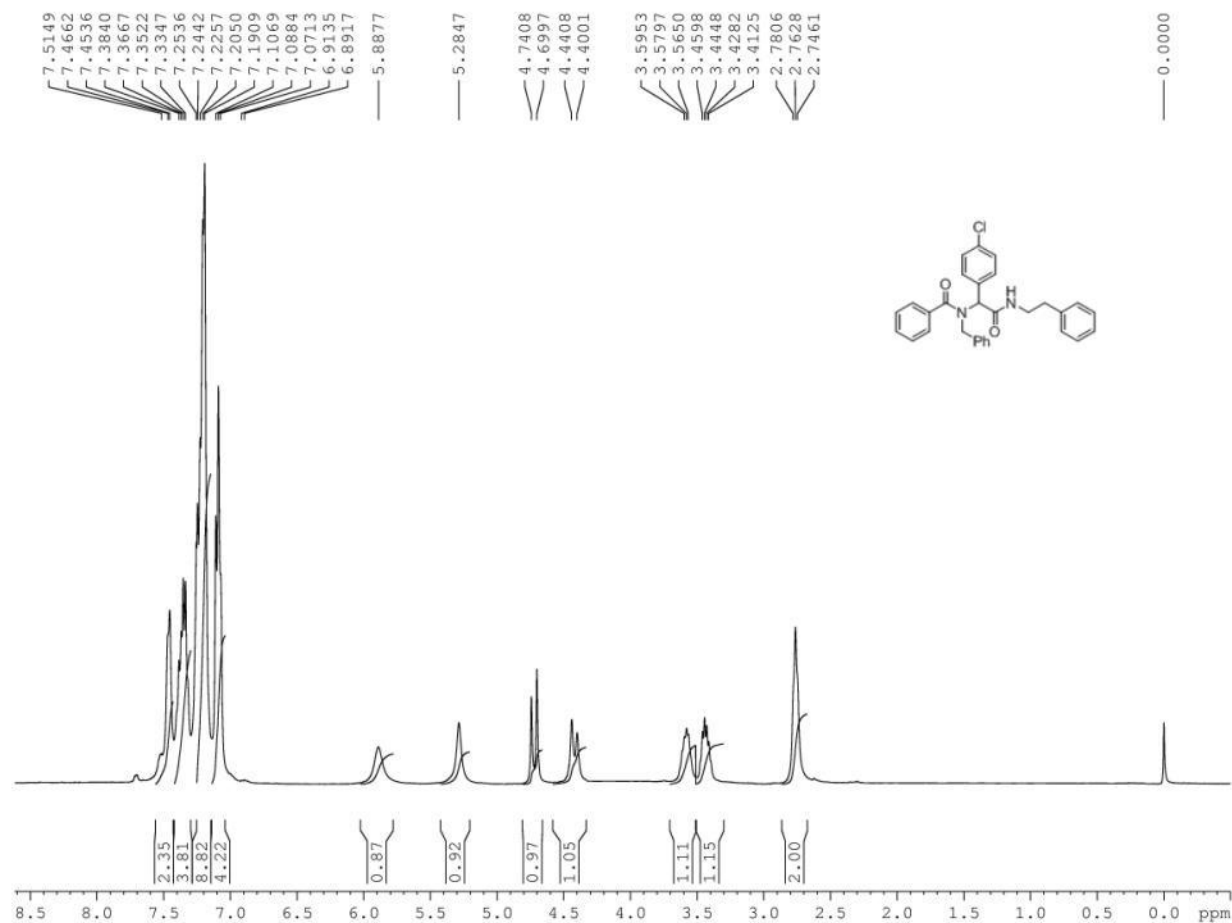



7a: <sup>13</sup>C NMR

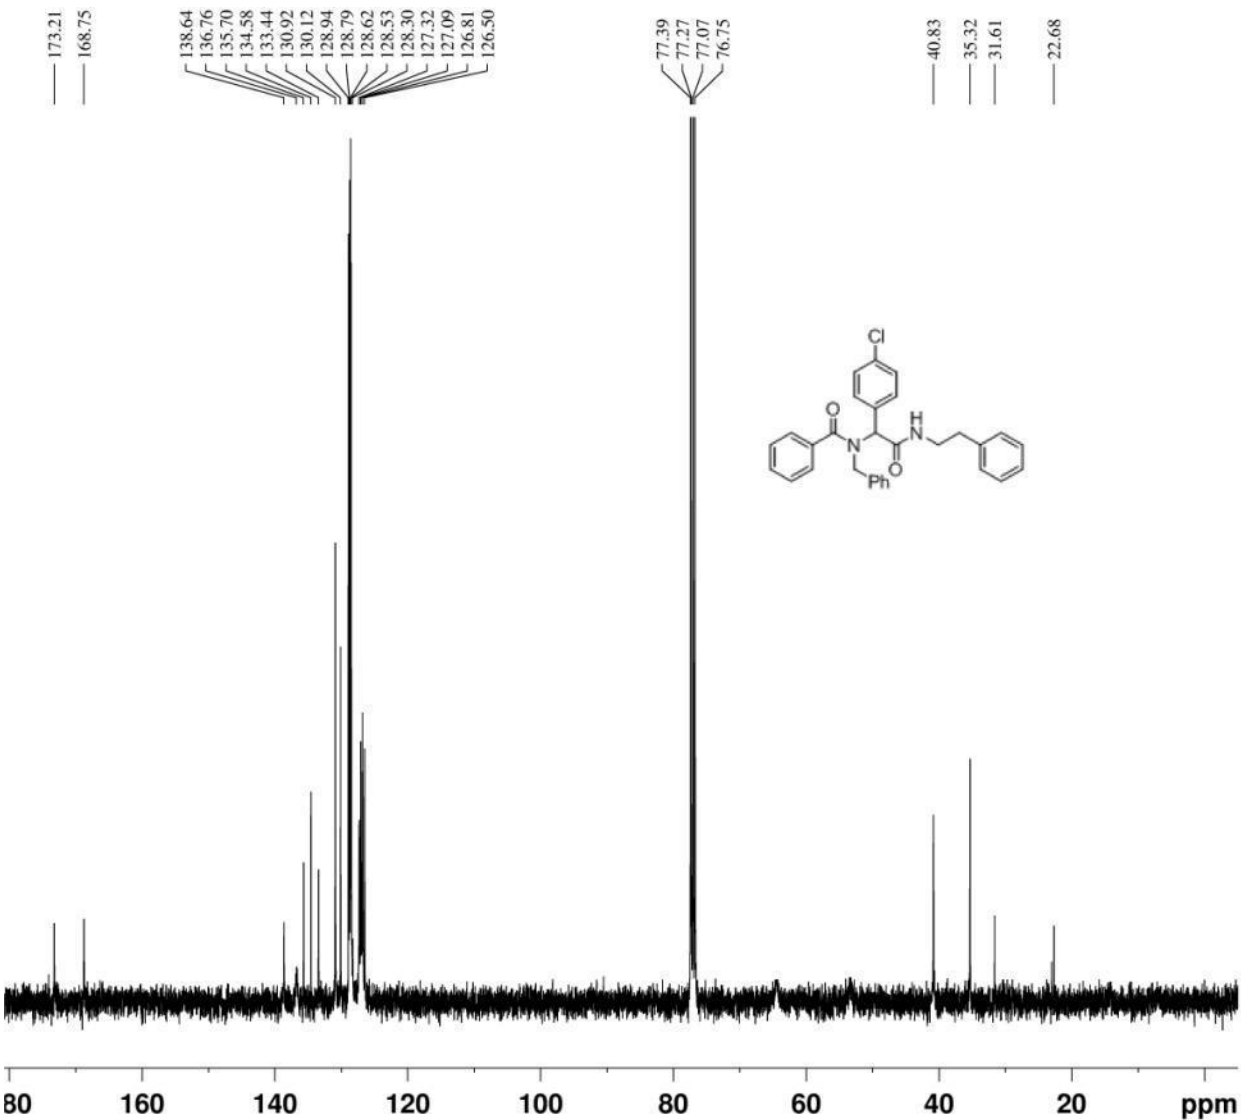

7b: <sup>1</sup>H NMR

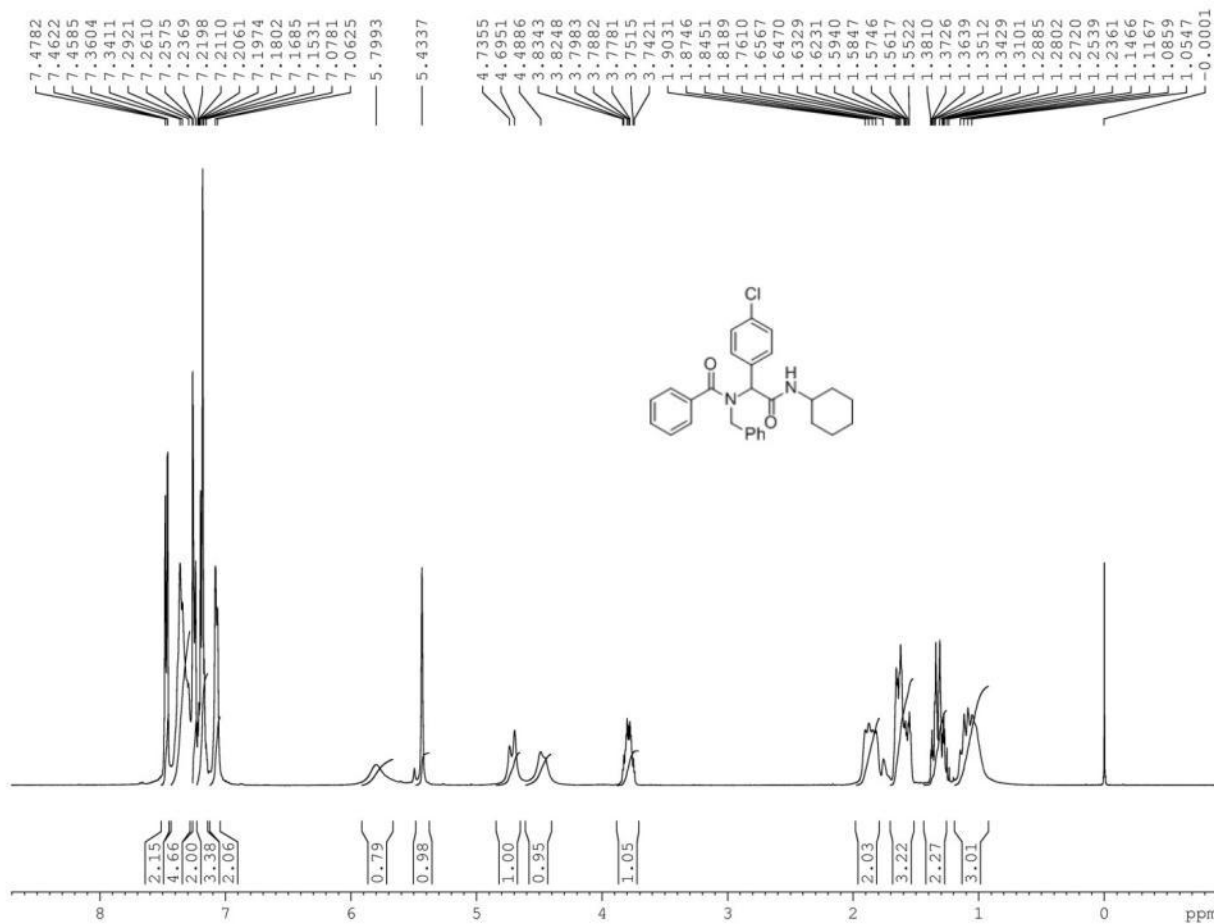

7b: <sup>13</sup>C NMR

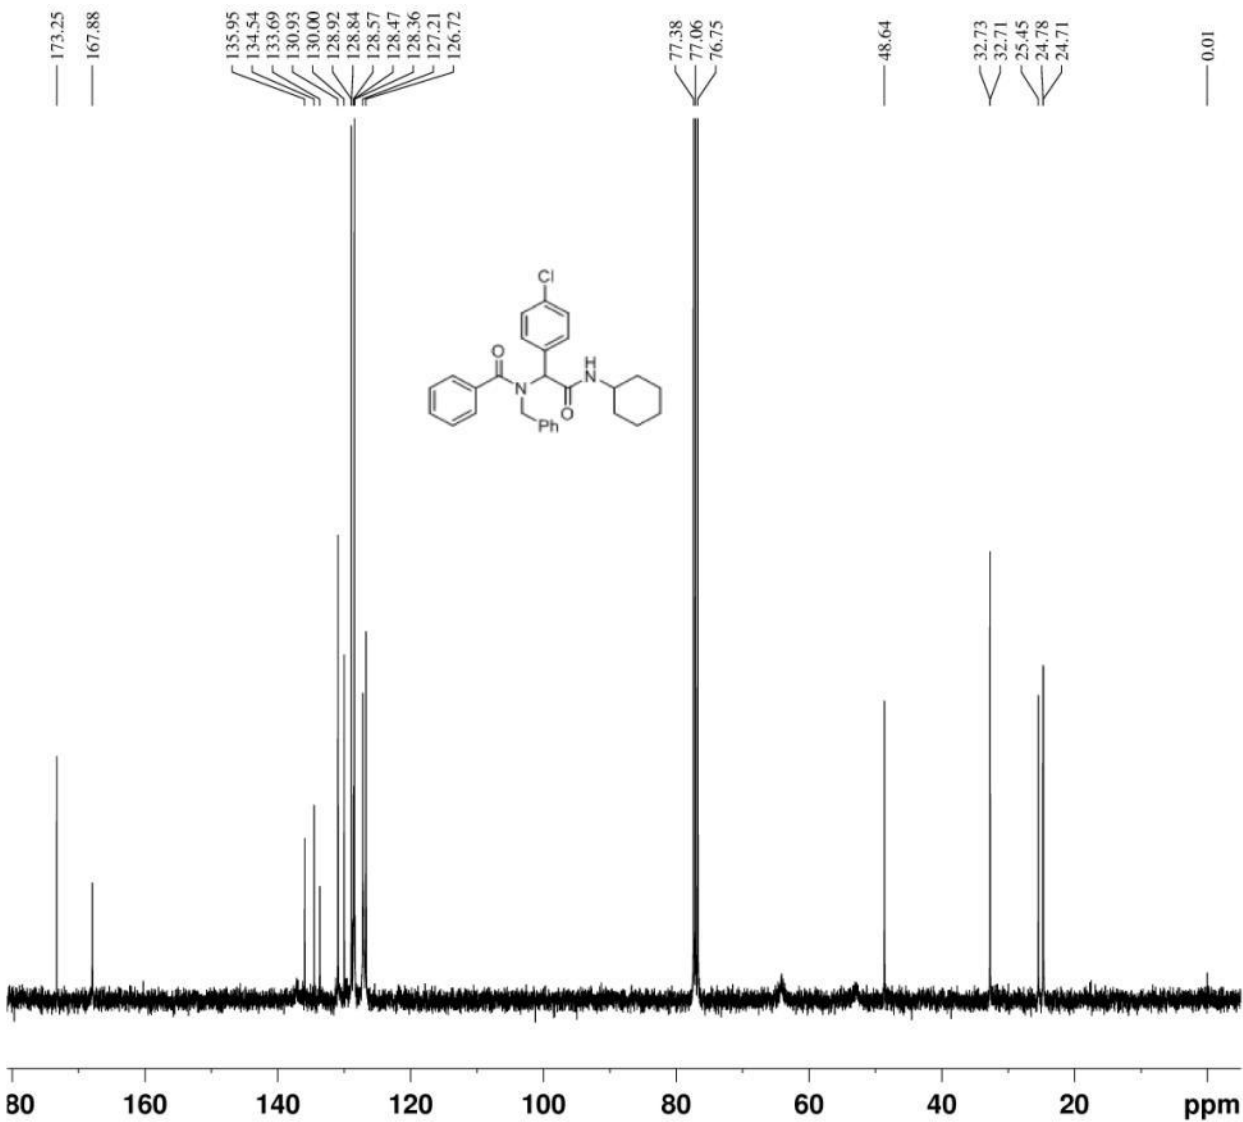

7c: <sup>1</sup>H NMR

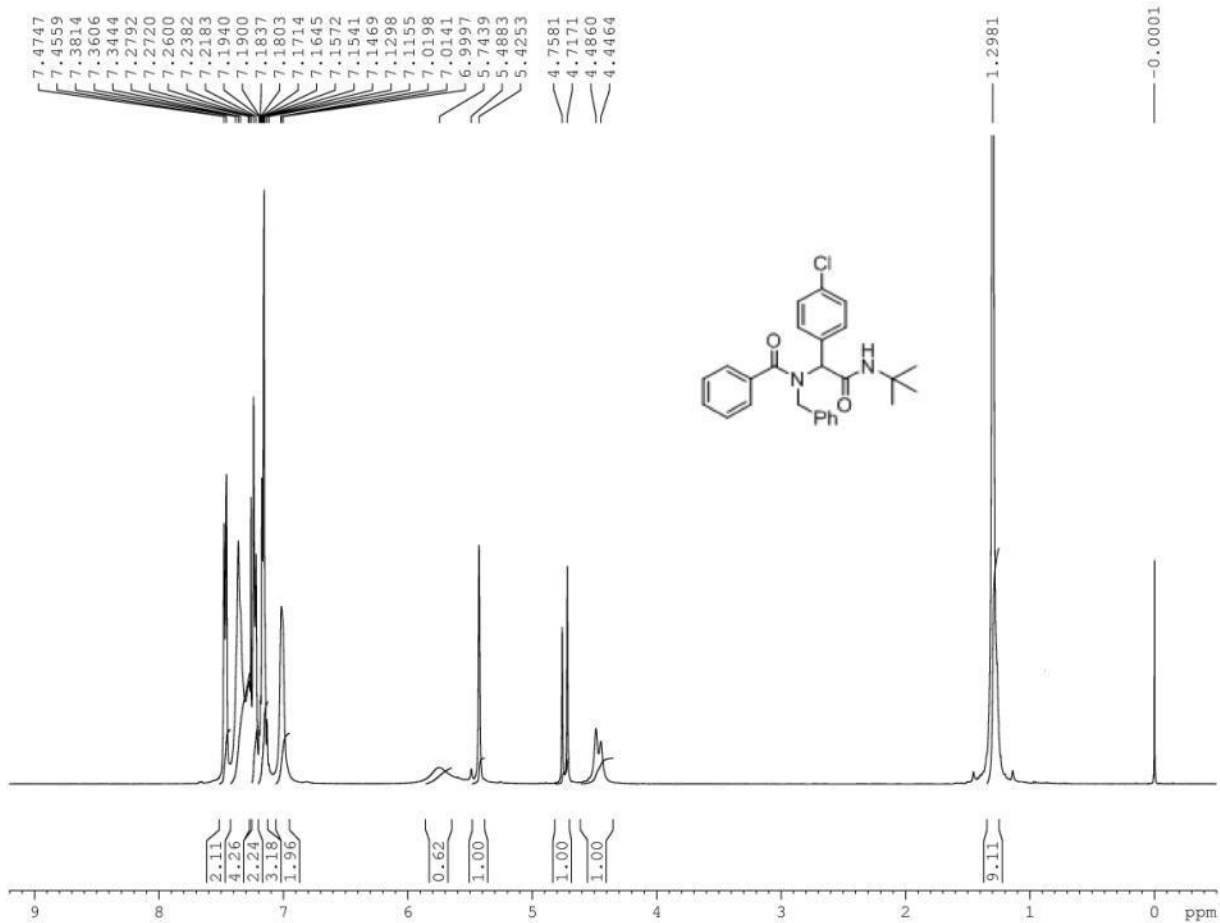

7c: <sup>13</sup>C NMR

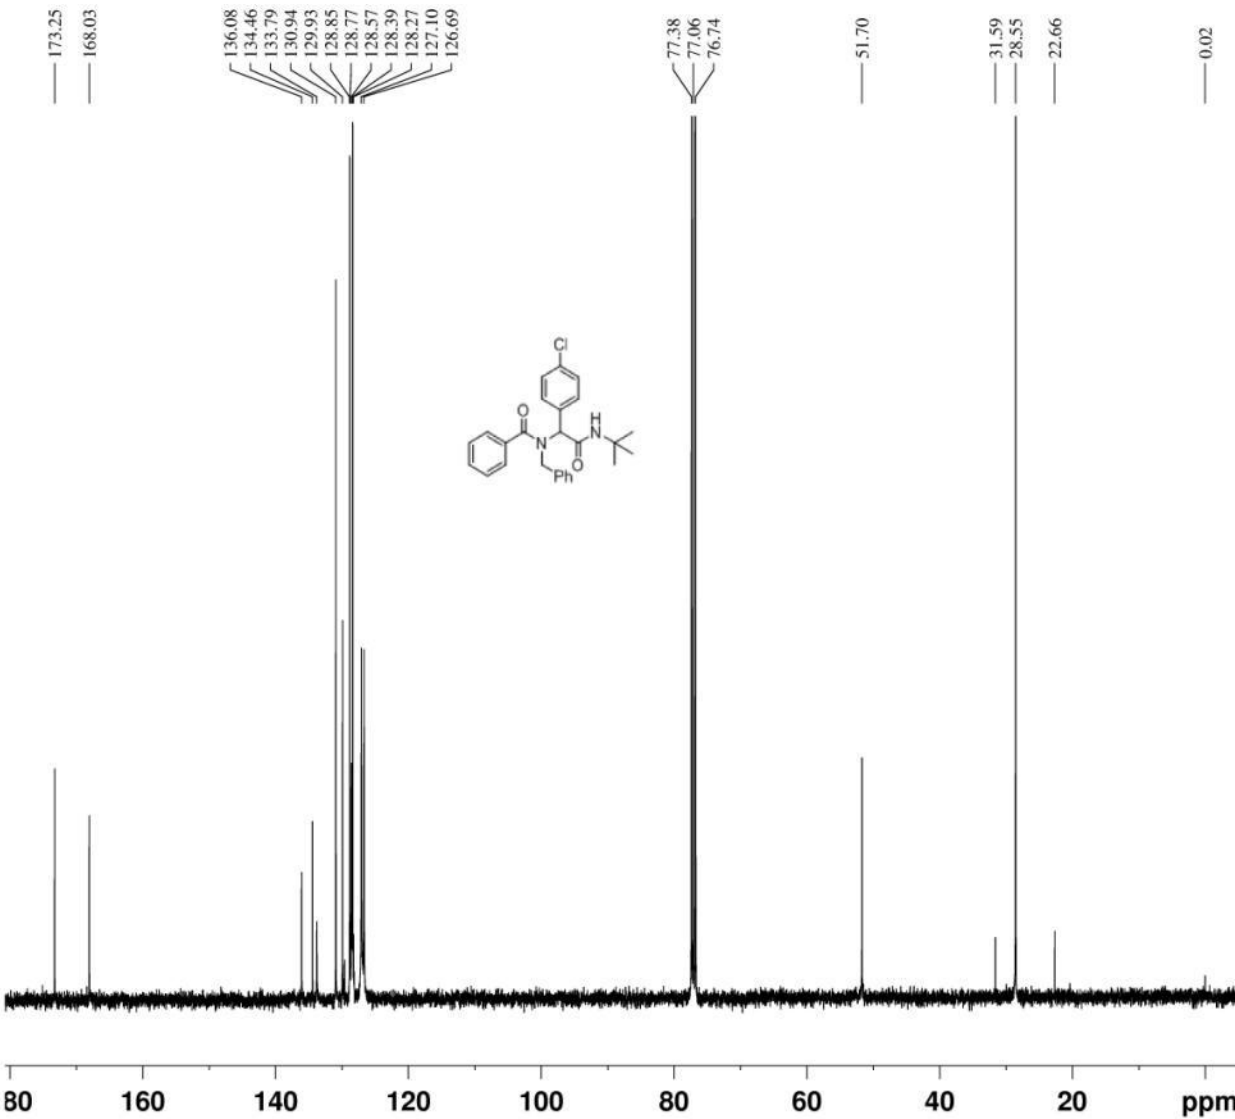

7d: <sup>1</sup>H NMR

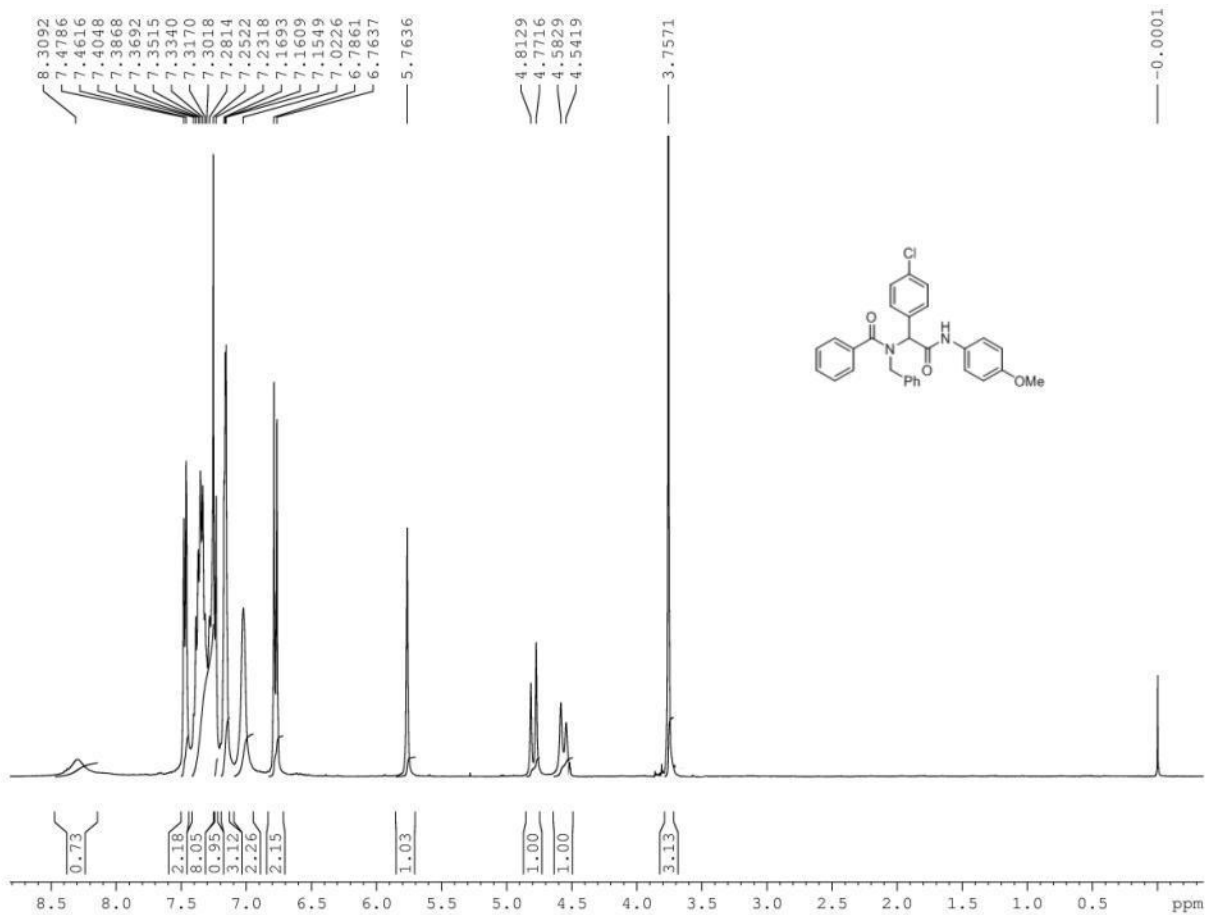

7d: <sup>13</sup>C NMR

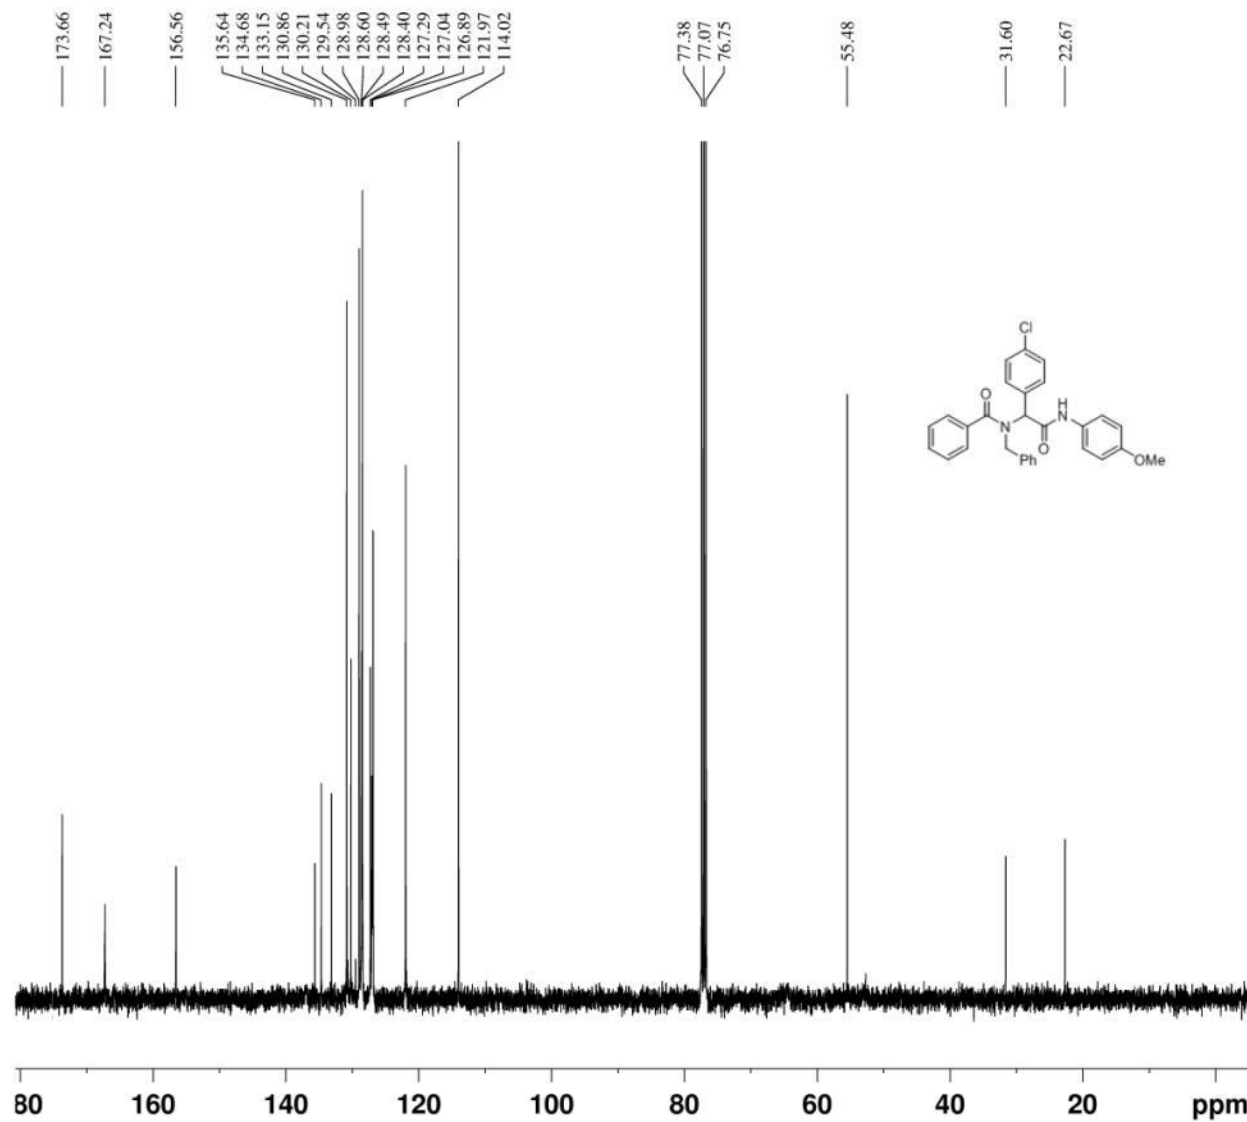

**7e:  $^1\text{H}$  NMR**

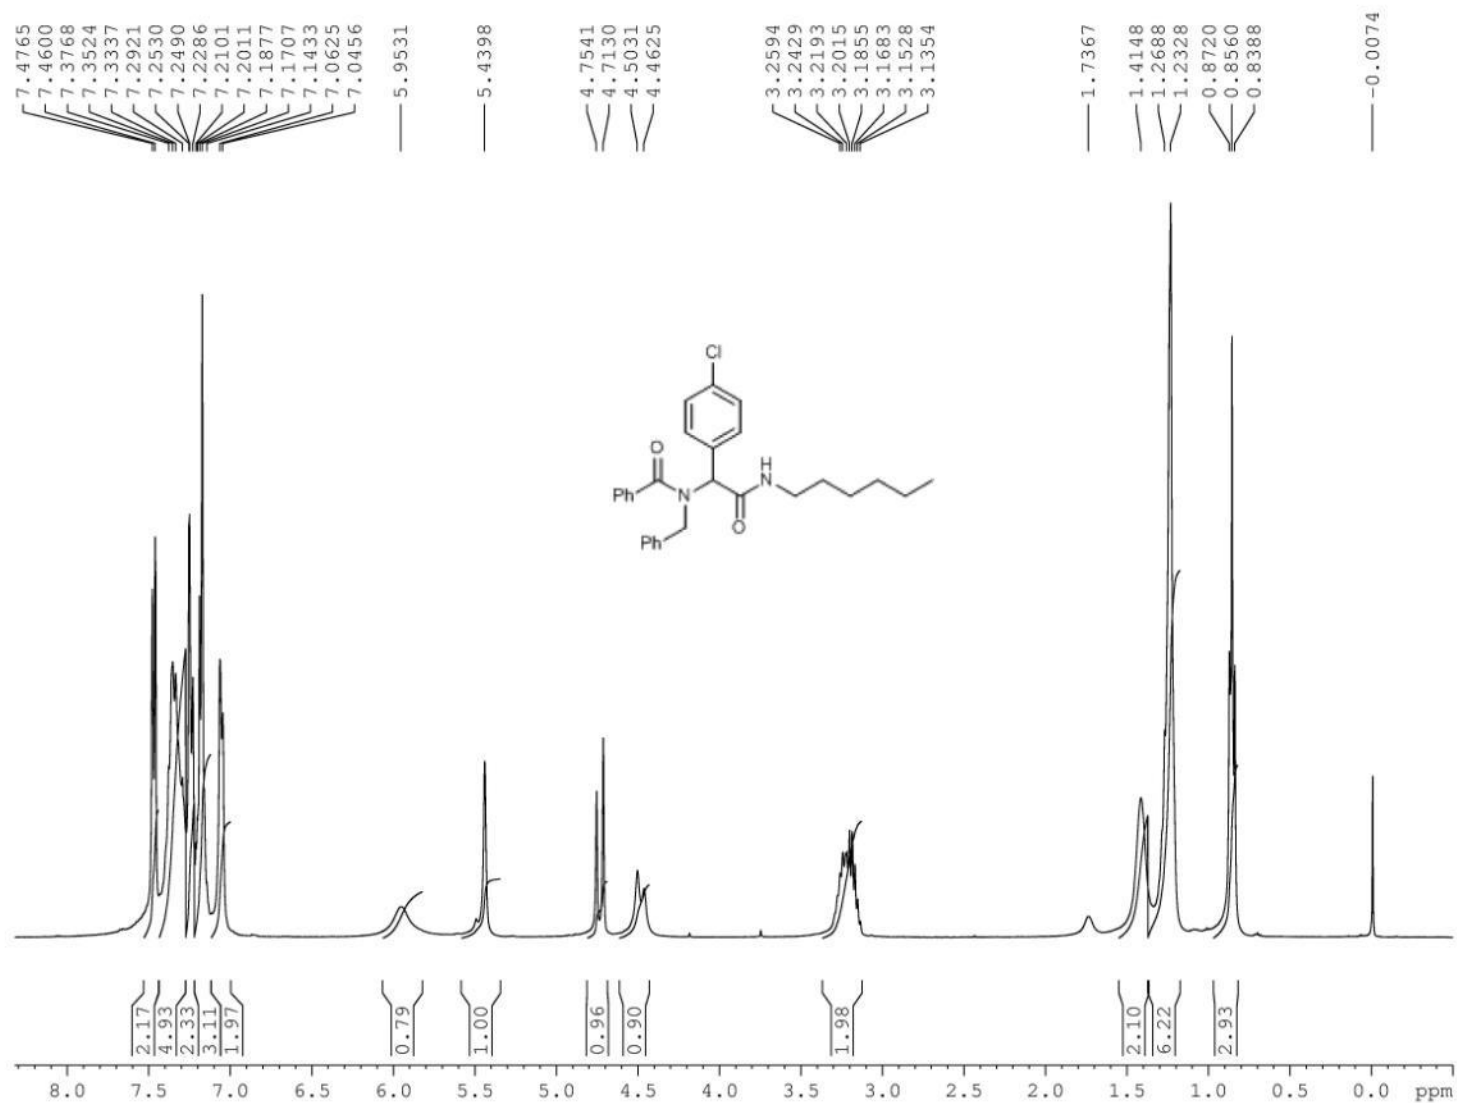



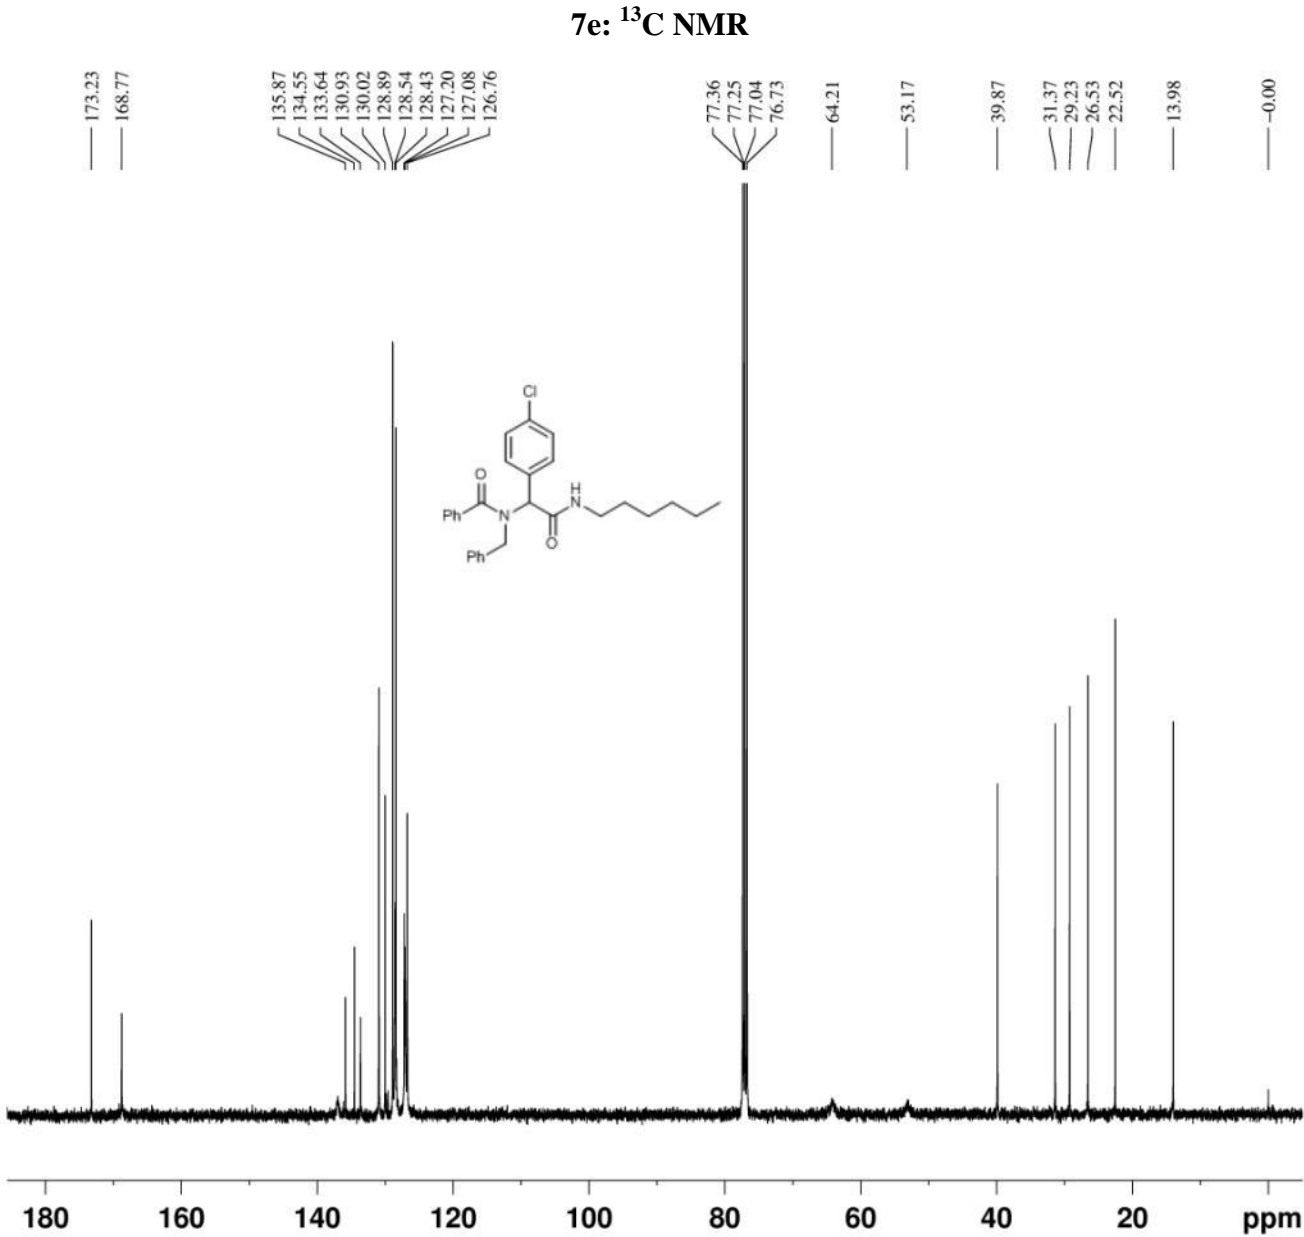

7f: <sup>1</sup>H NMR

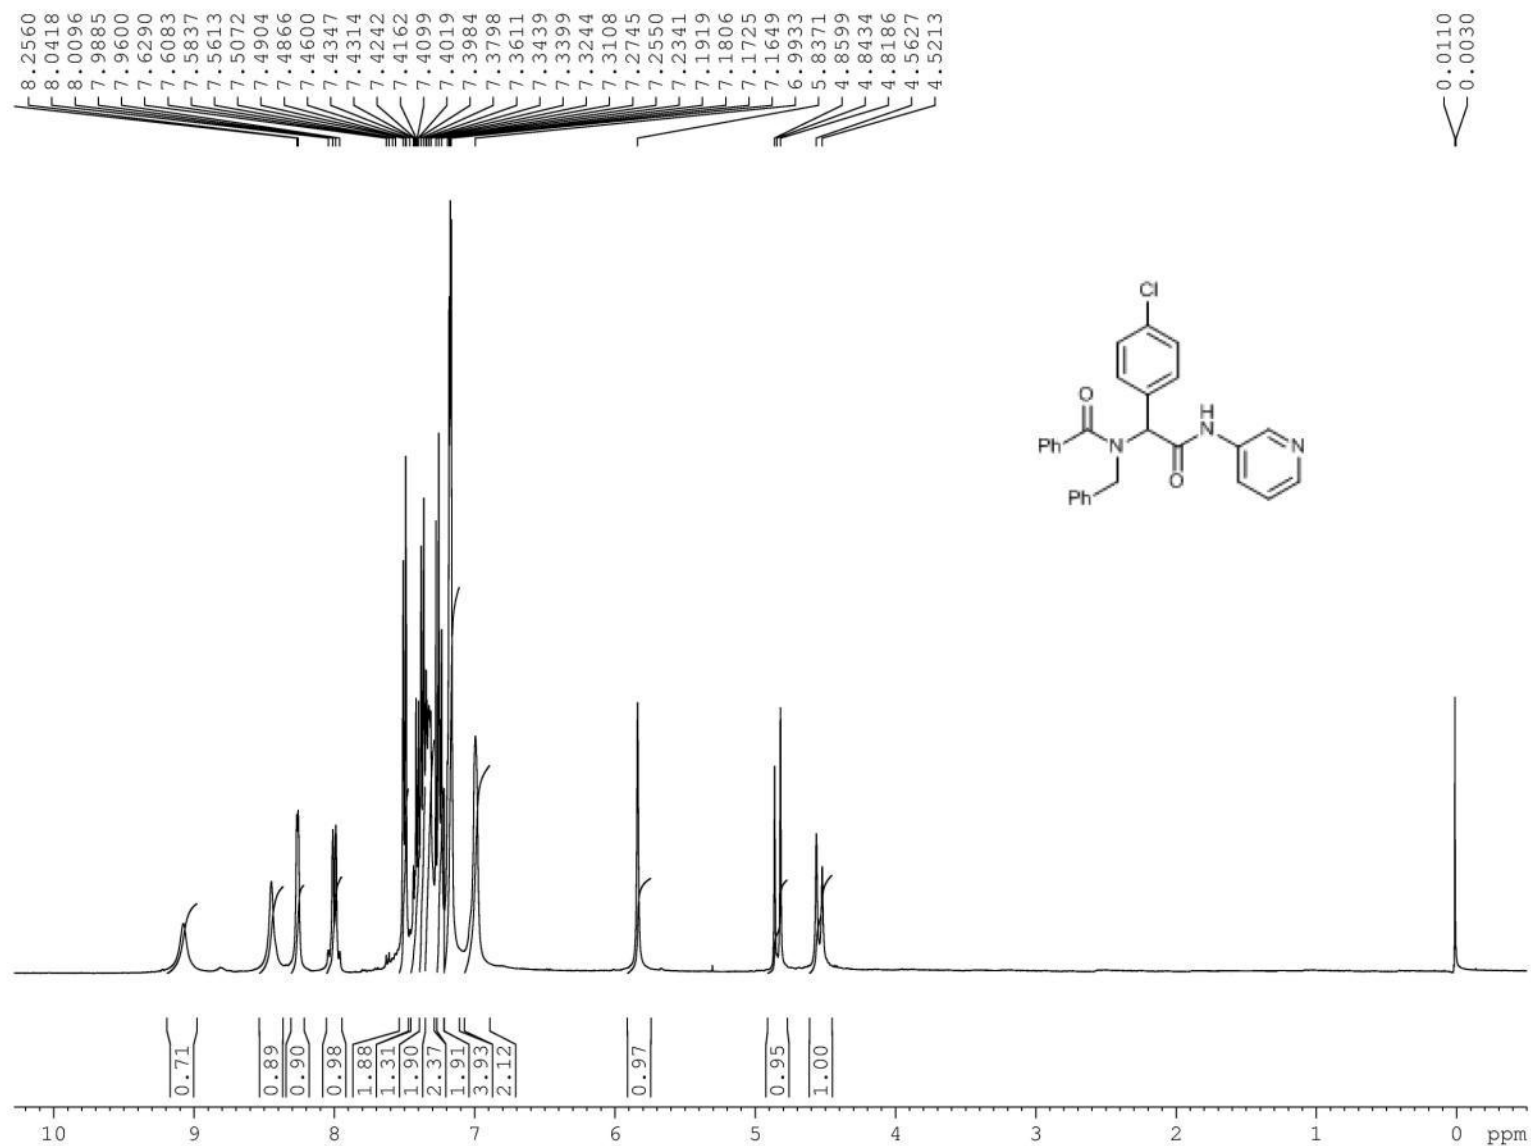

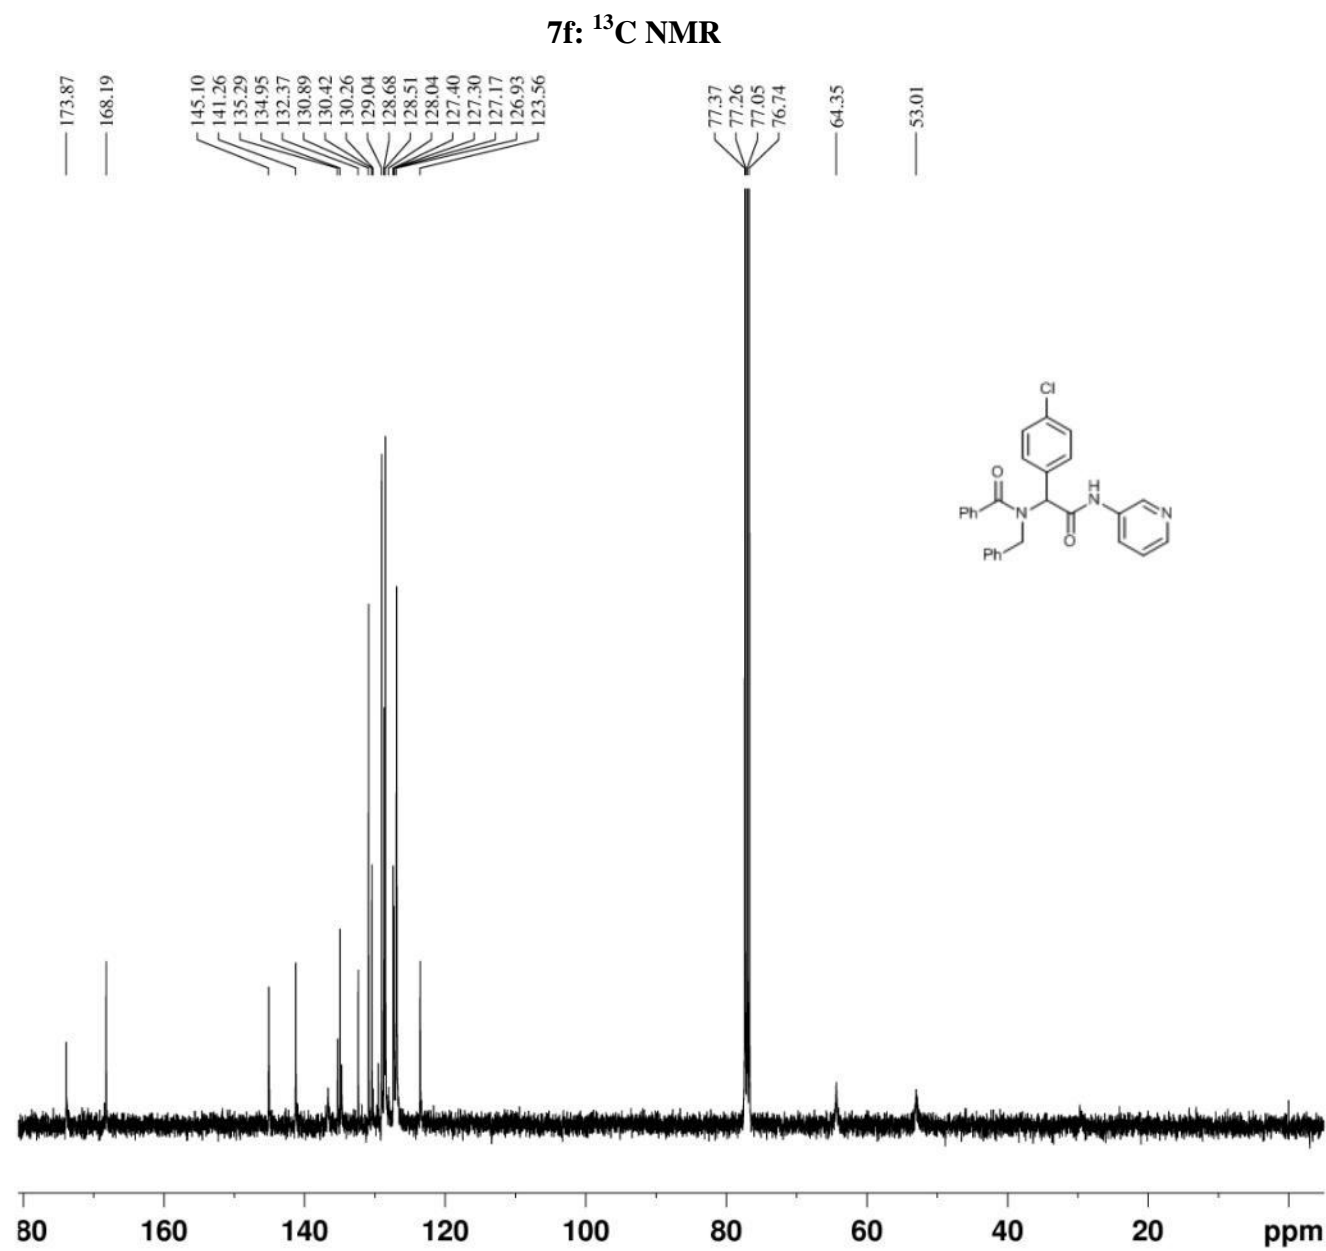

7g: <sup>1</sup>H NMR

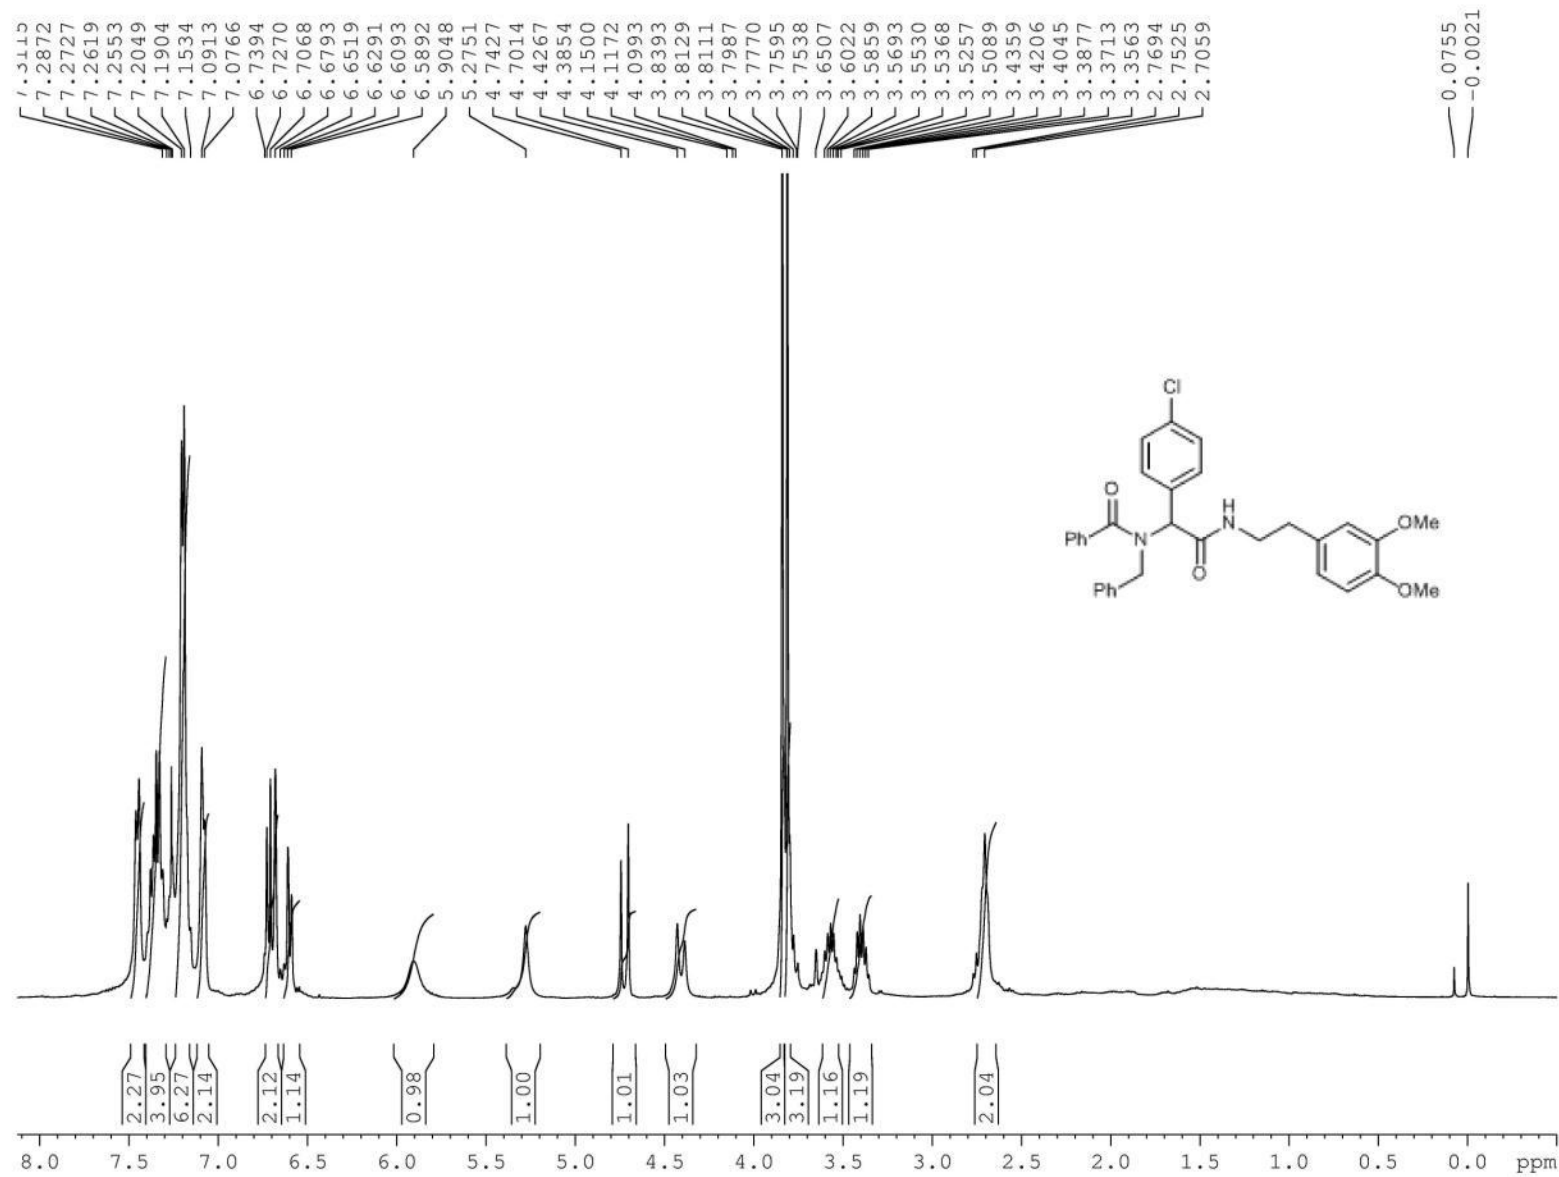

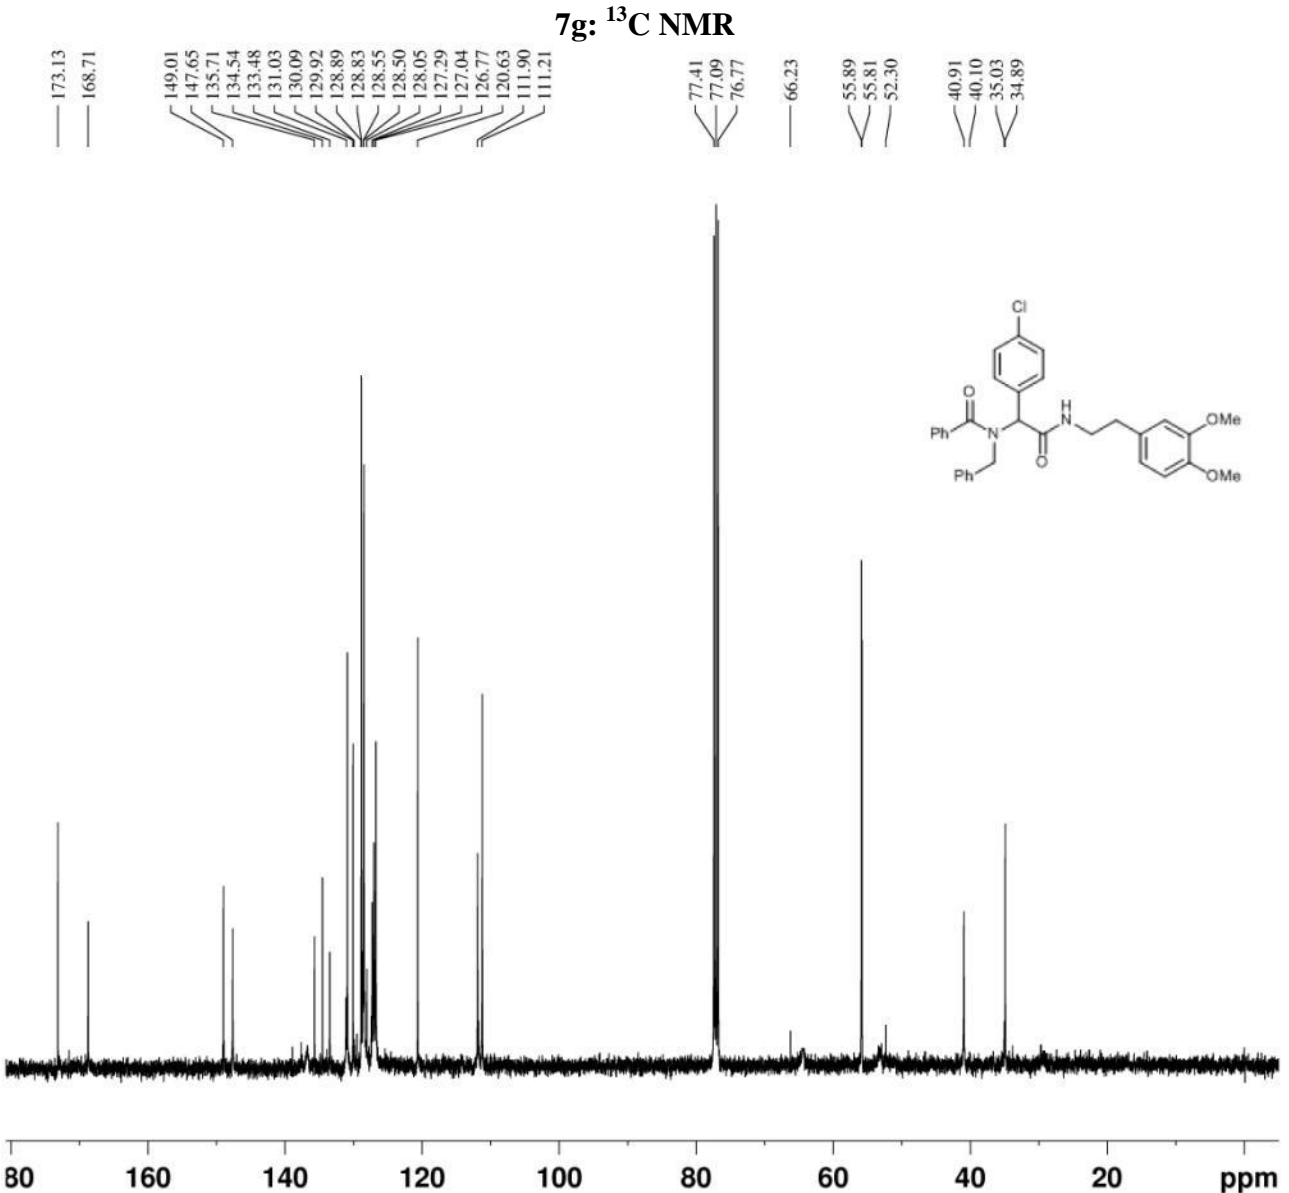

7h: <sup>1</sup>H NMR

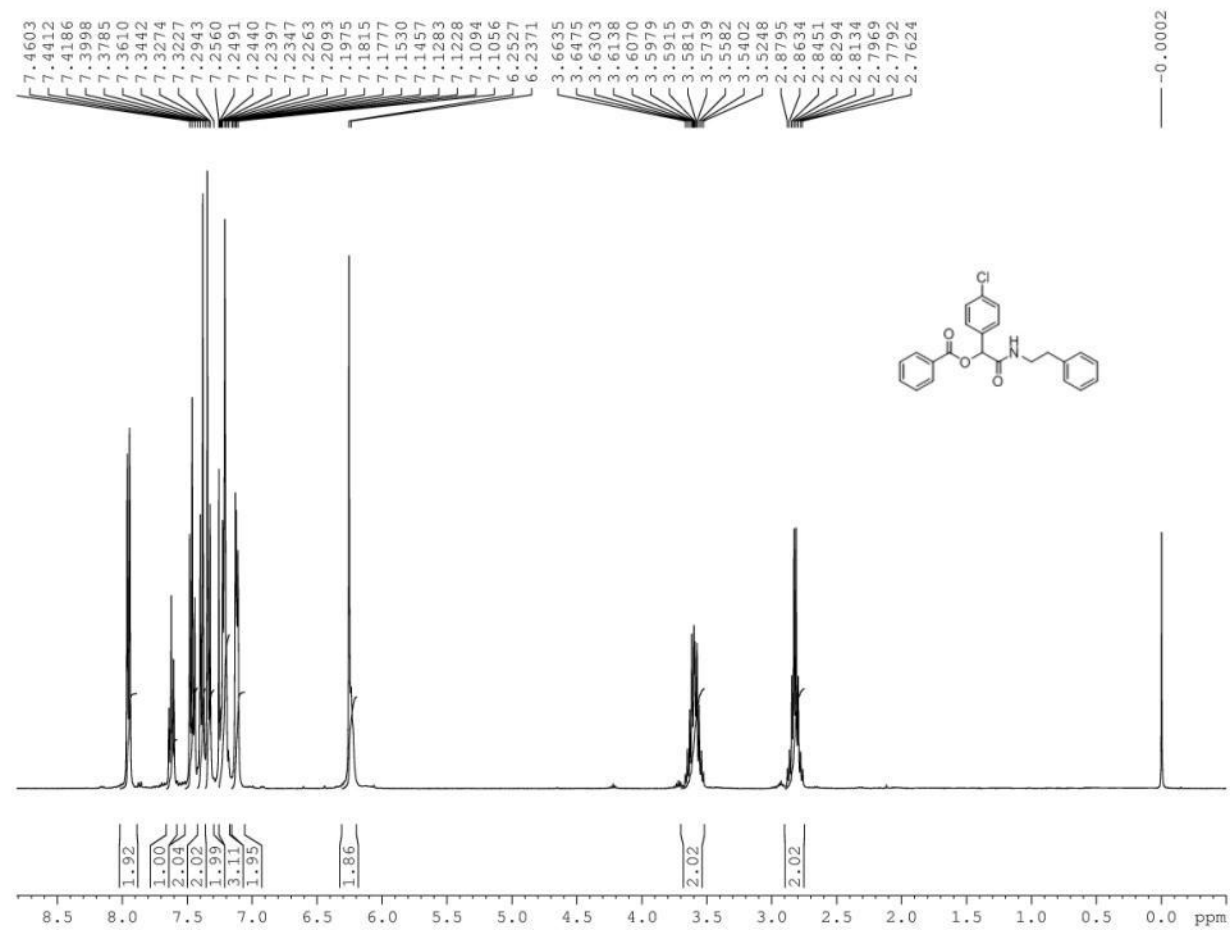

7h: <sup>13</sup>C NMR

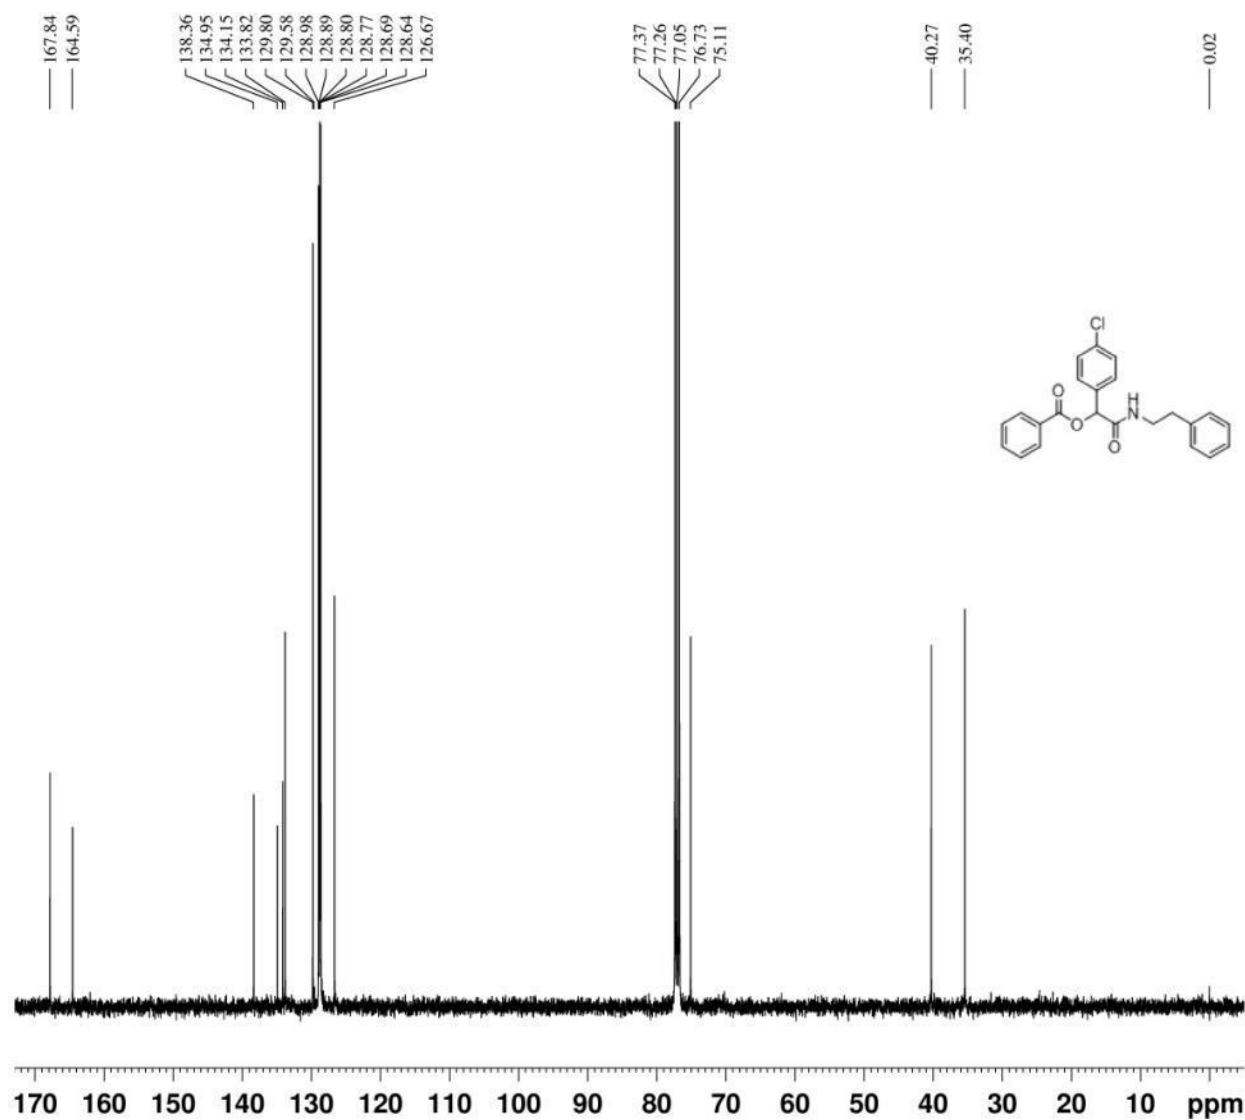

7i: <sup>1</sup>H NMR

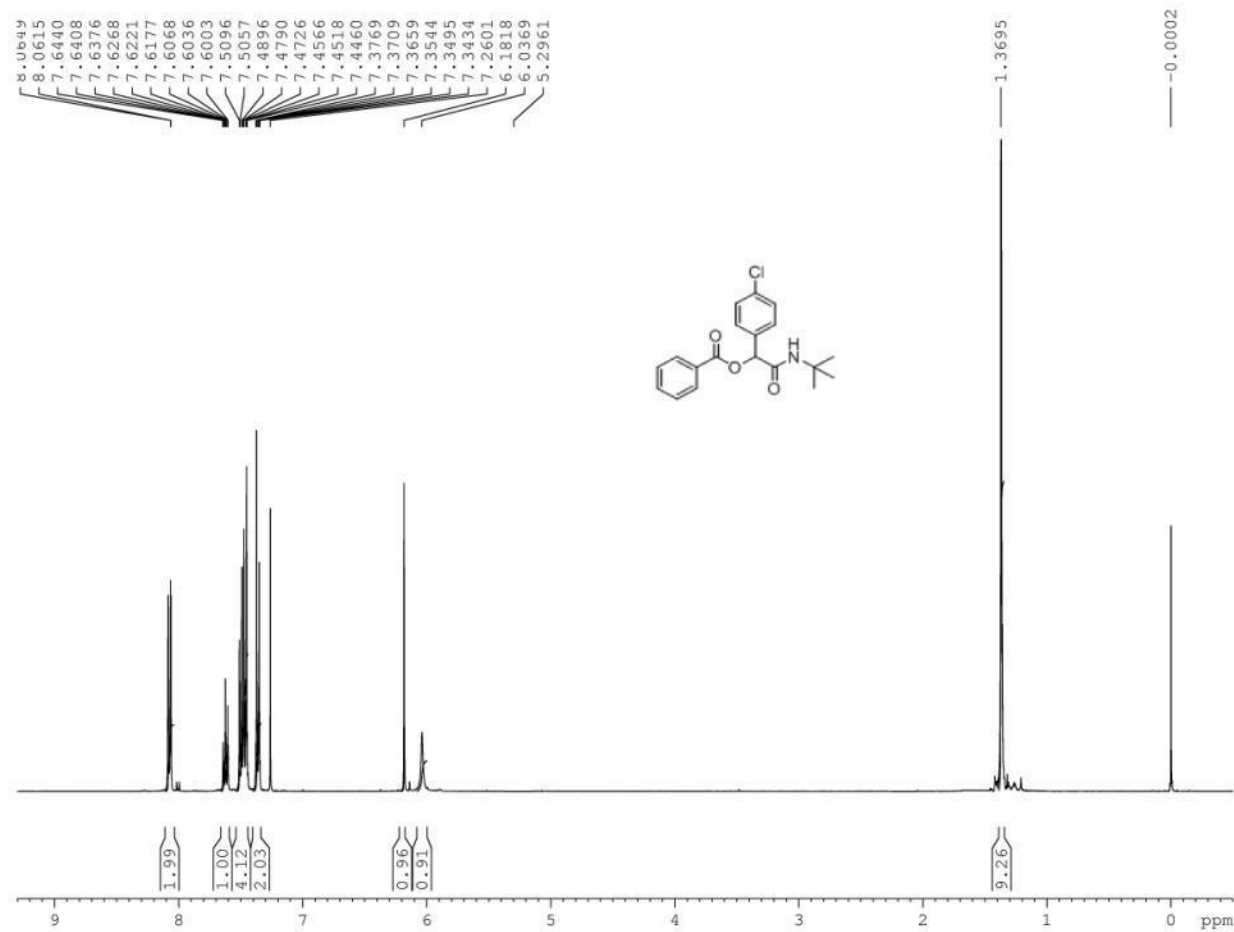



7i: <sup>13</sup>C NMR

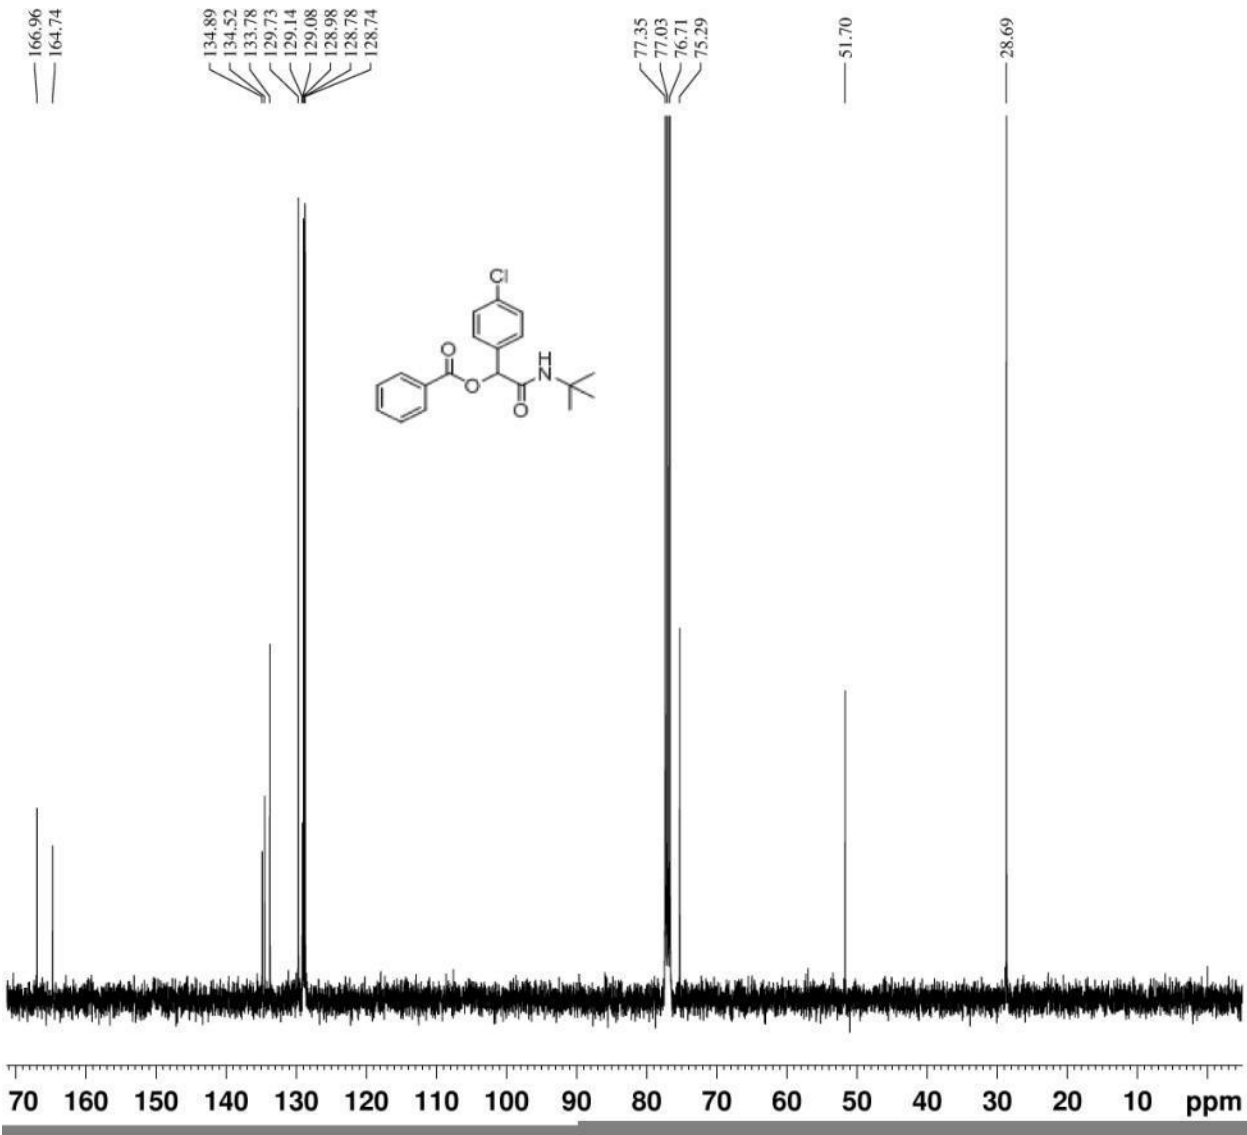

7j: <sup>1</sup>H NMR

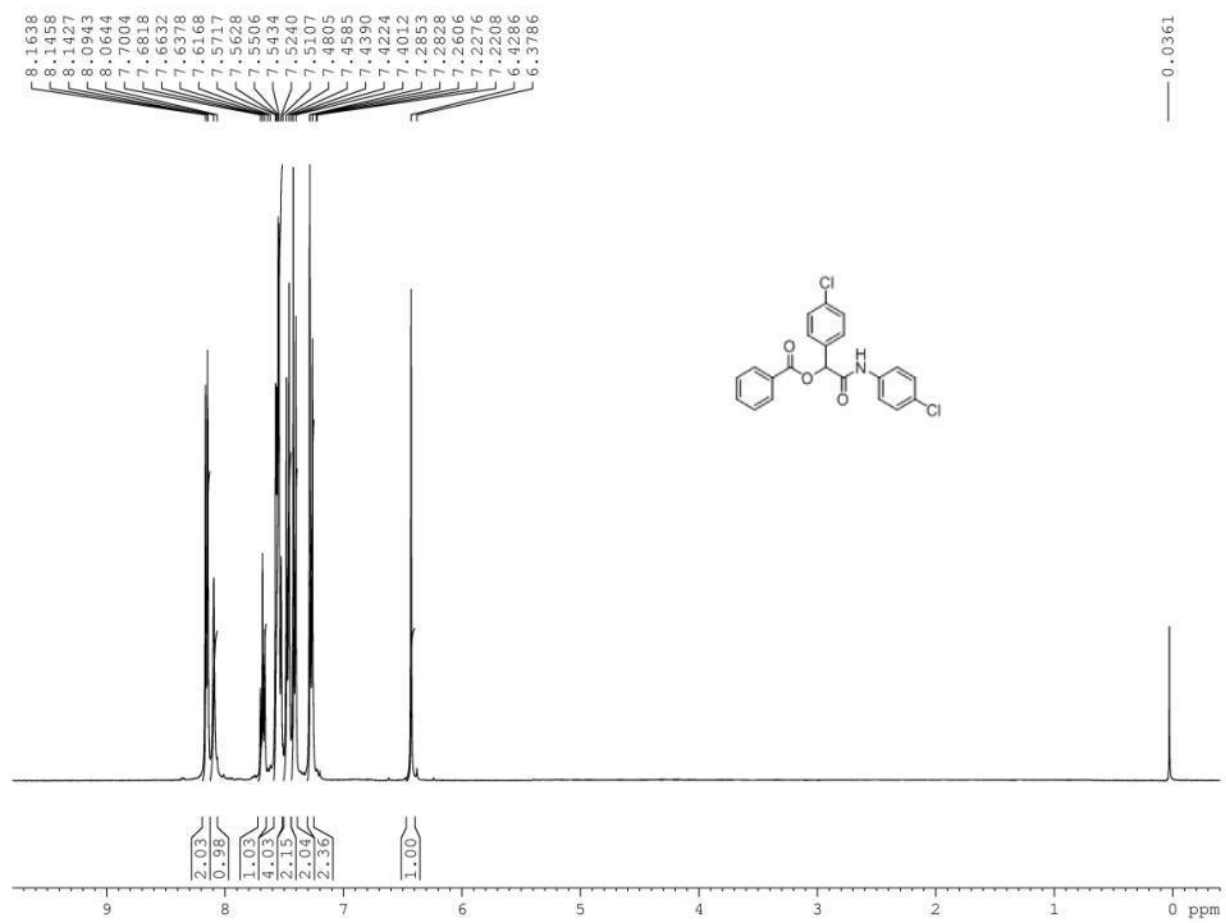

7j: <sup>13</sup>C NMR

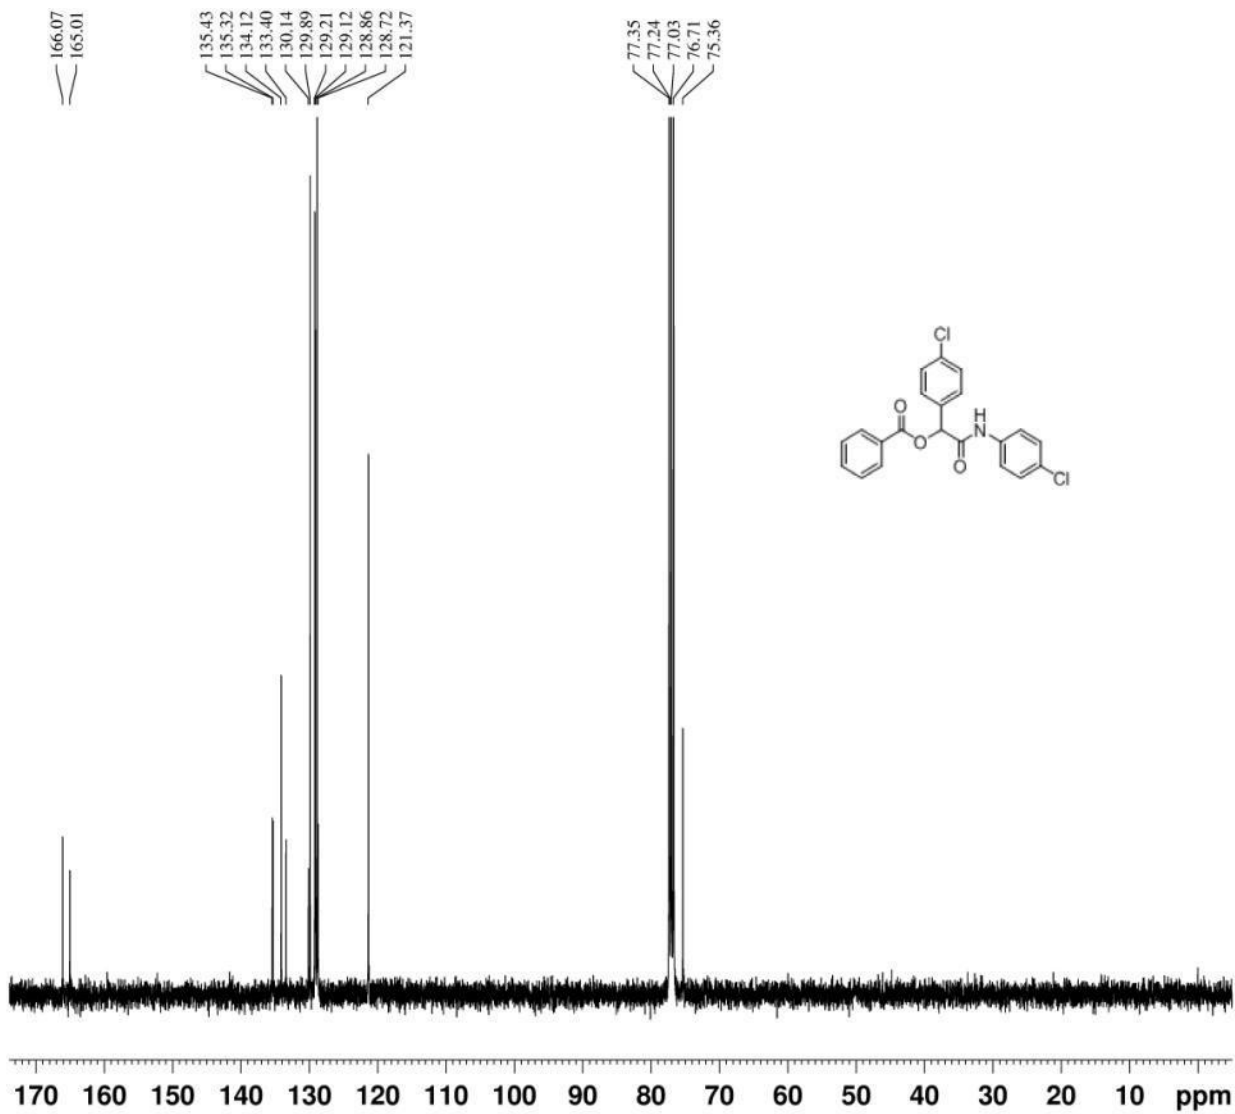

7k: <sup>1</sup>H NMR

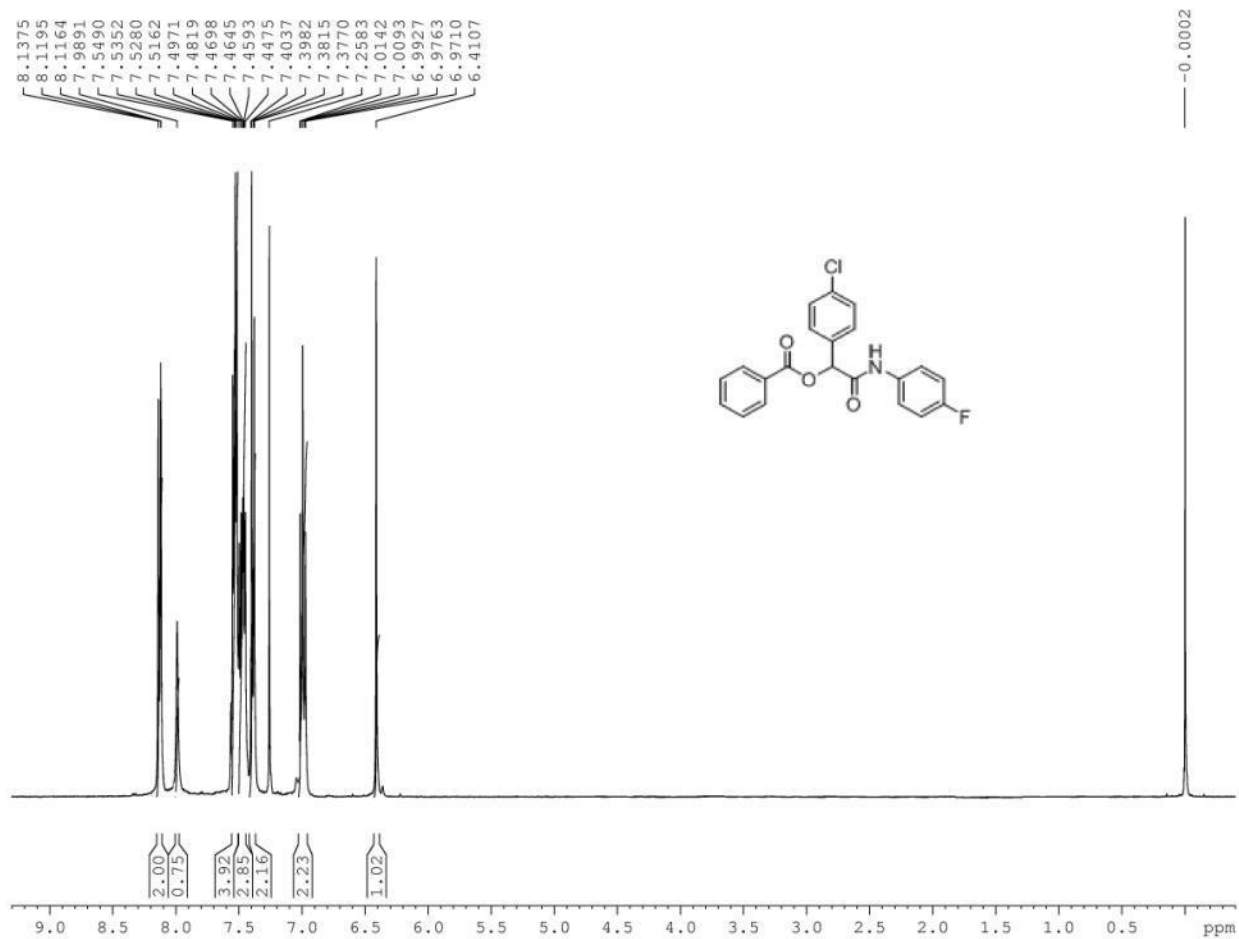

7k: <sup>13</sup>C NMR

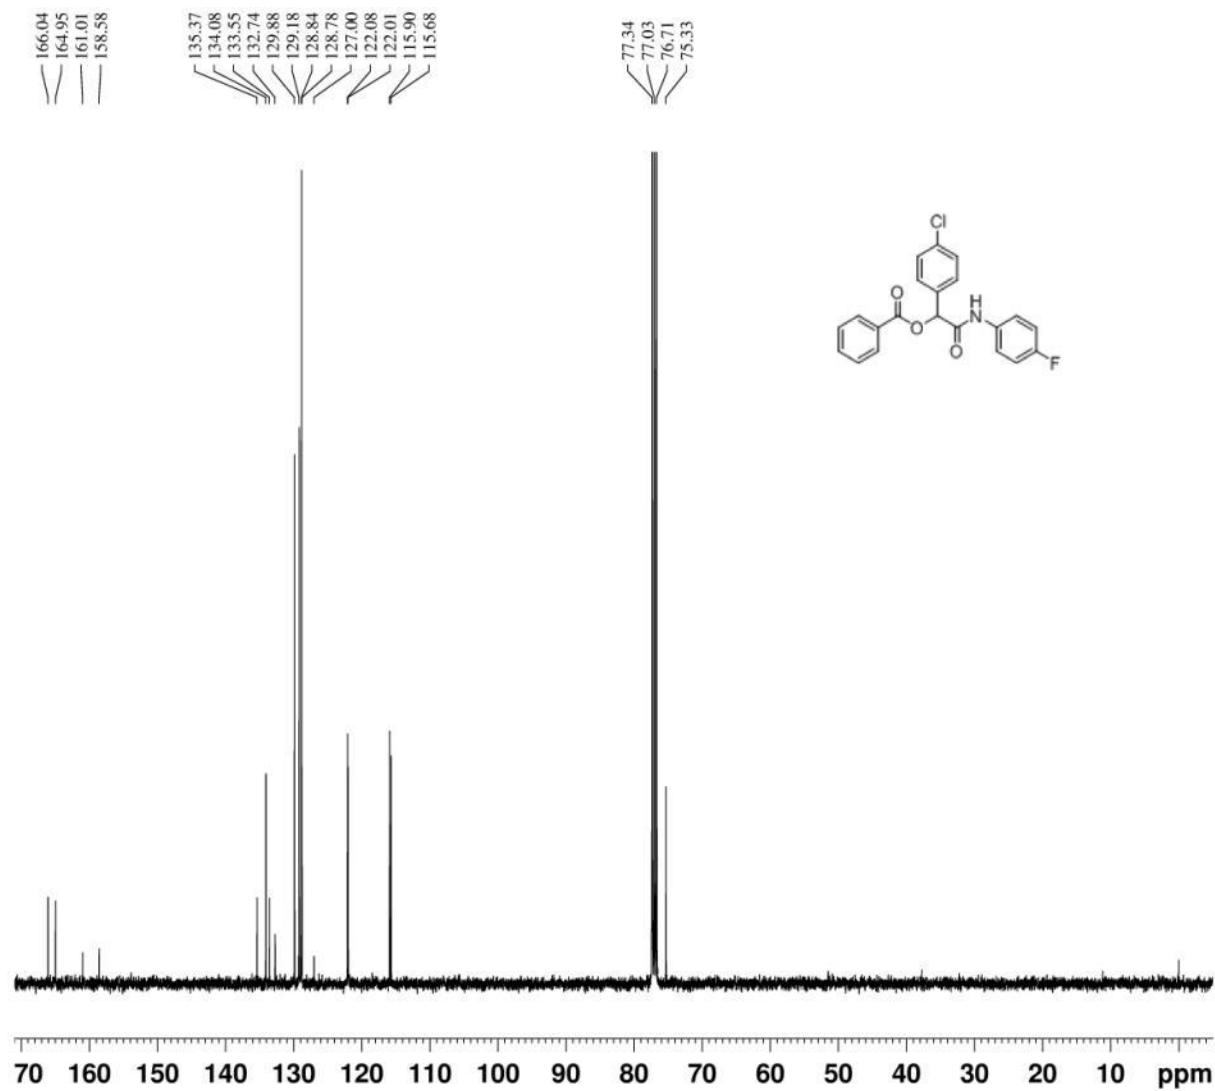

**71:  $^1\text{H}$  NMR**

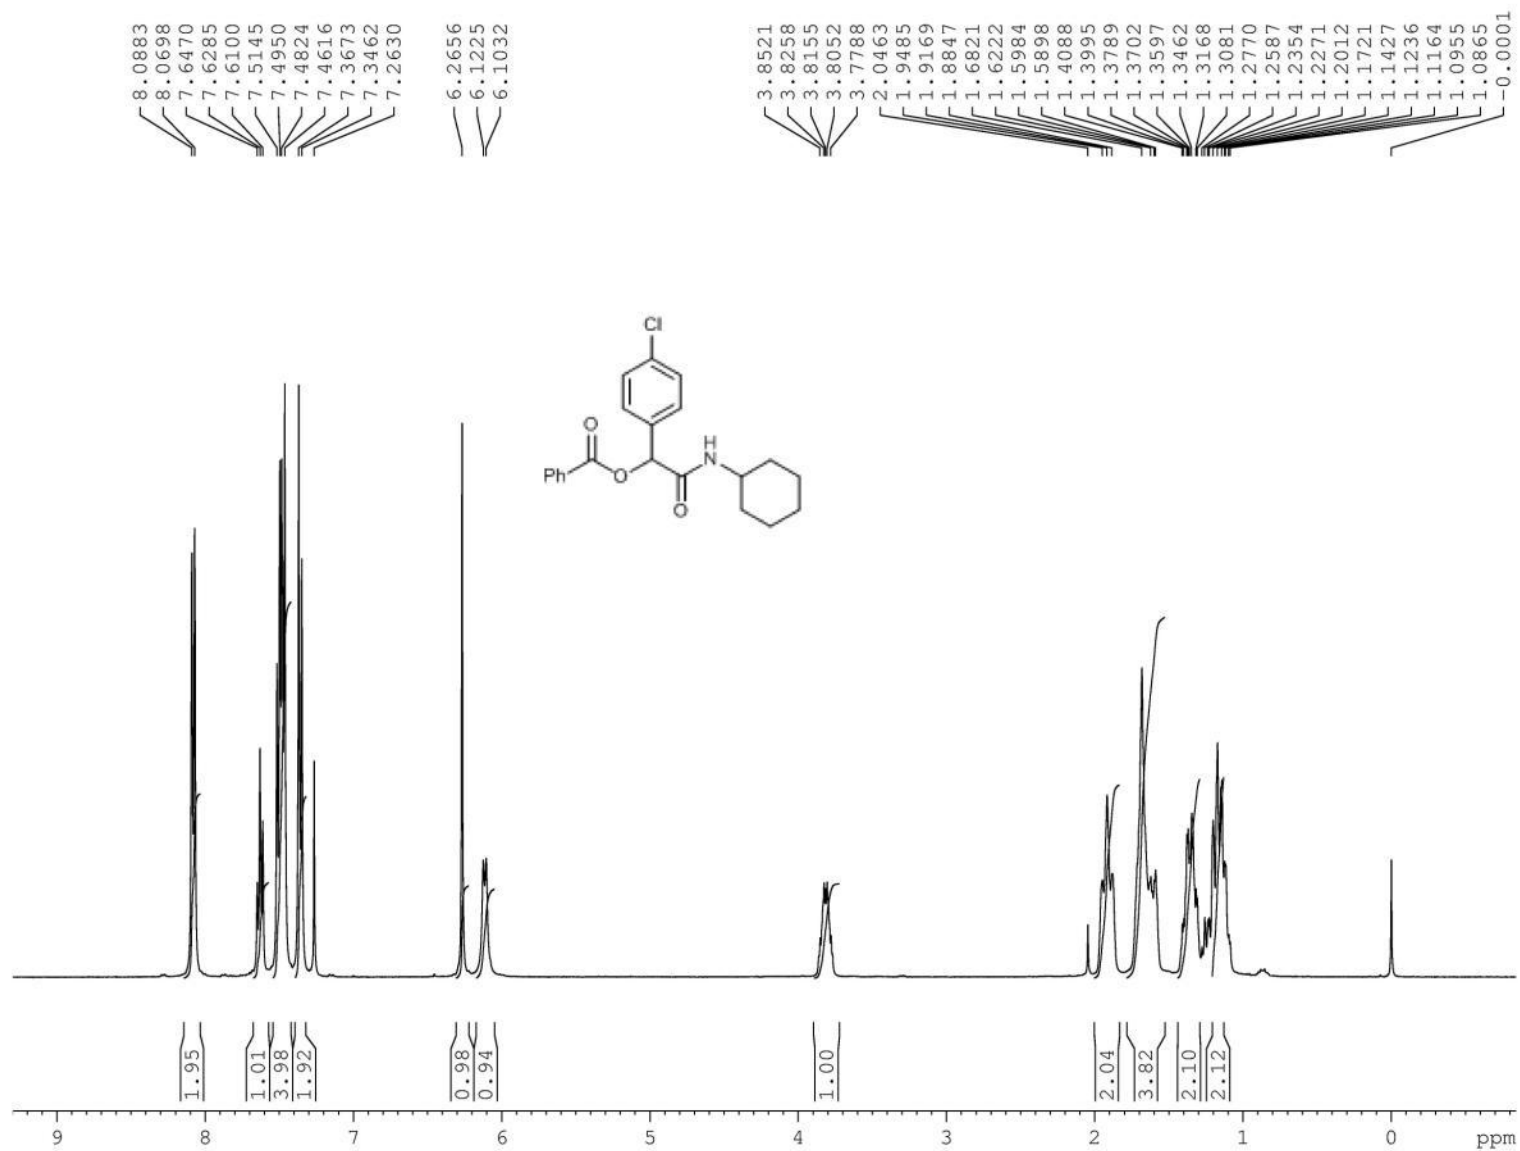

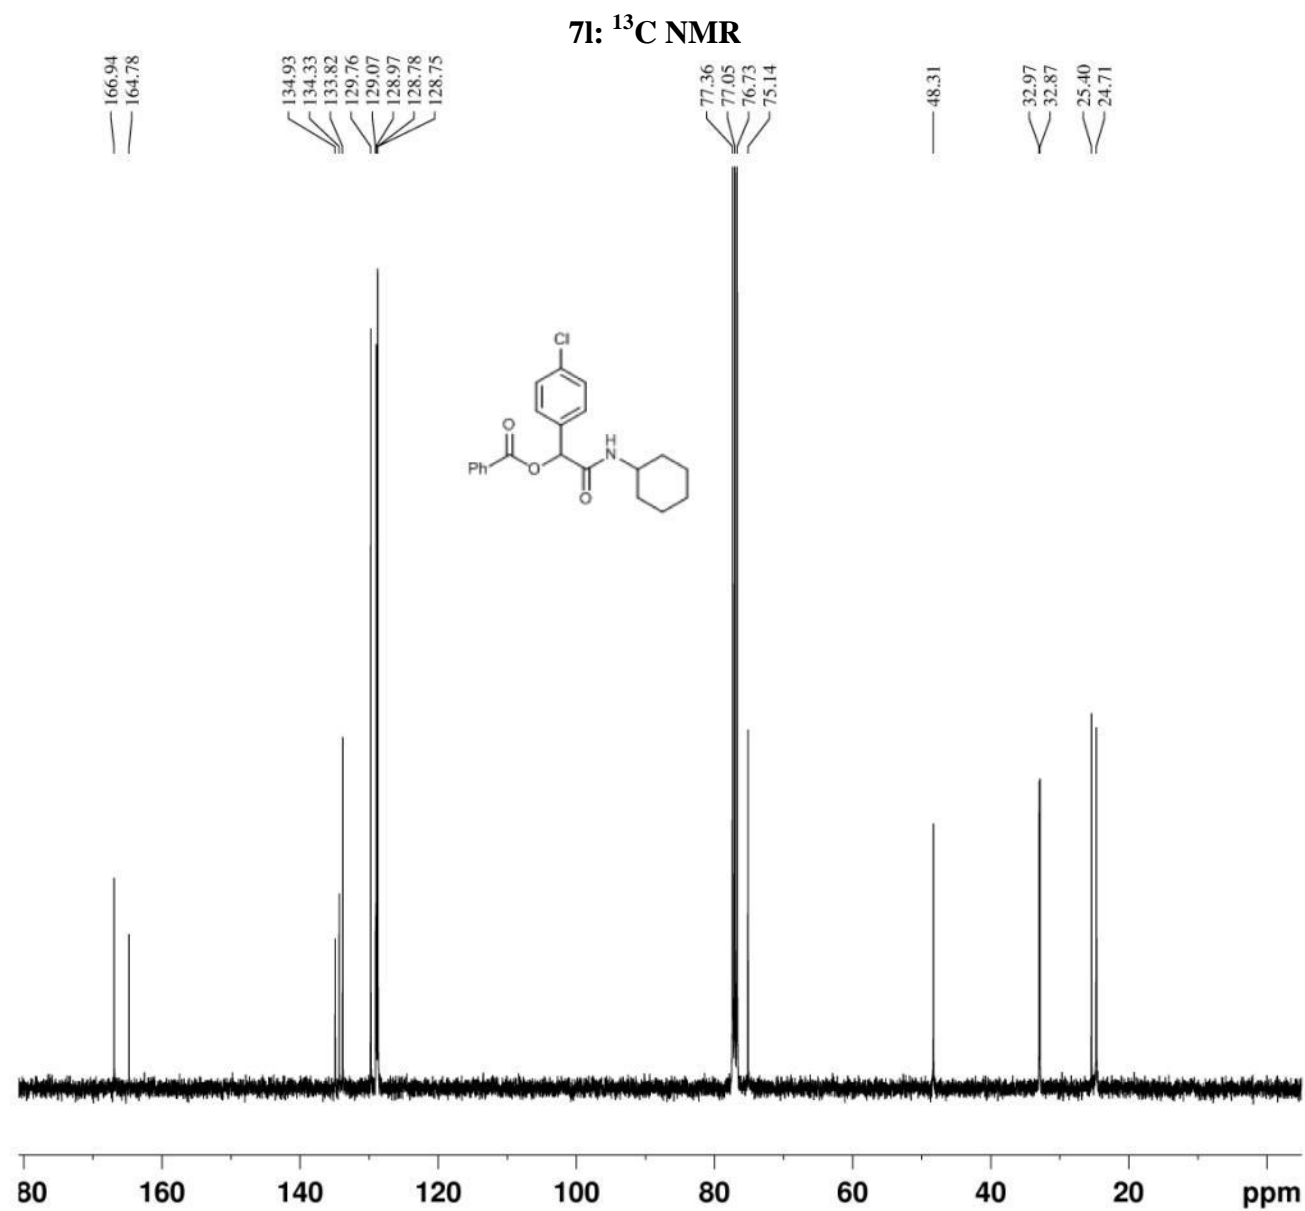

**7m:  $^1\text{H}$  NMR**

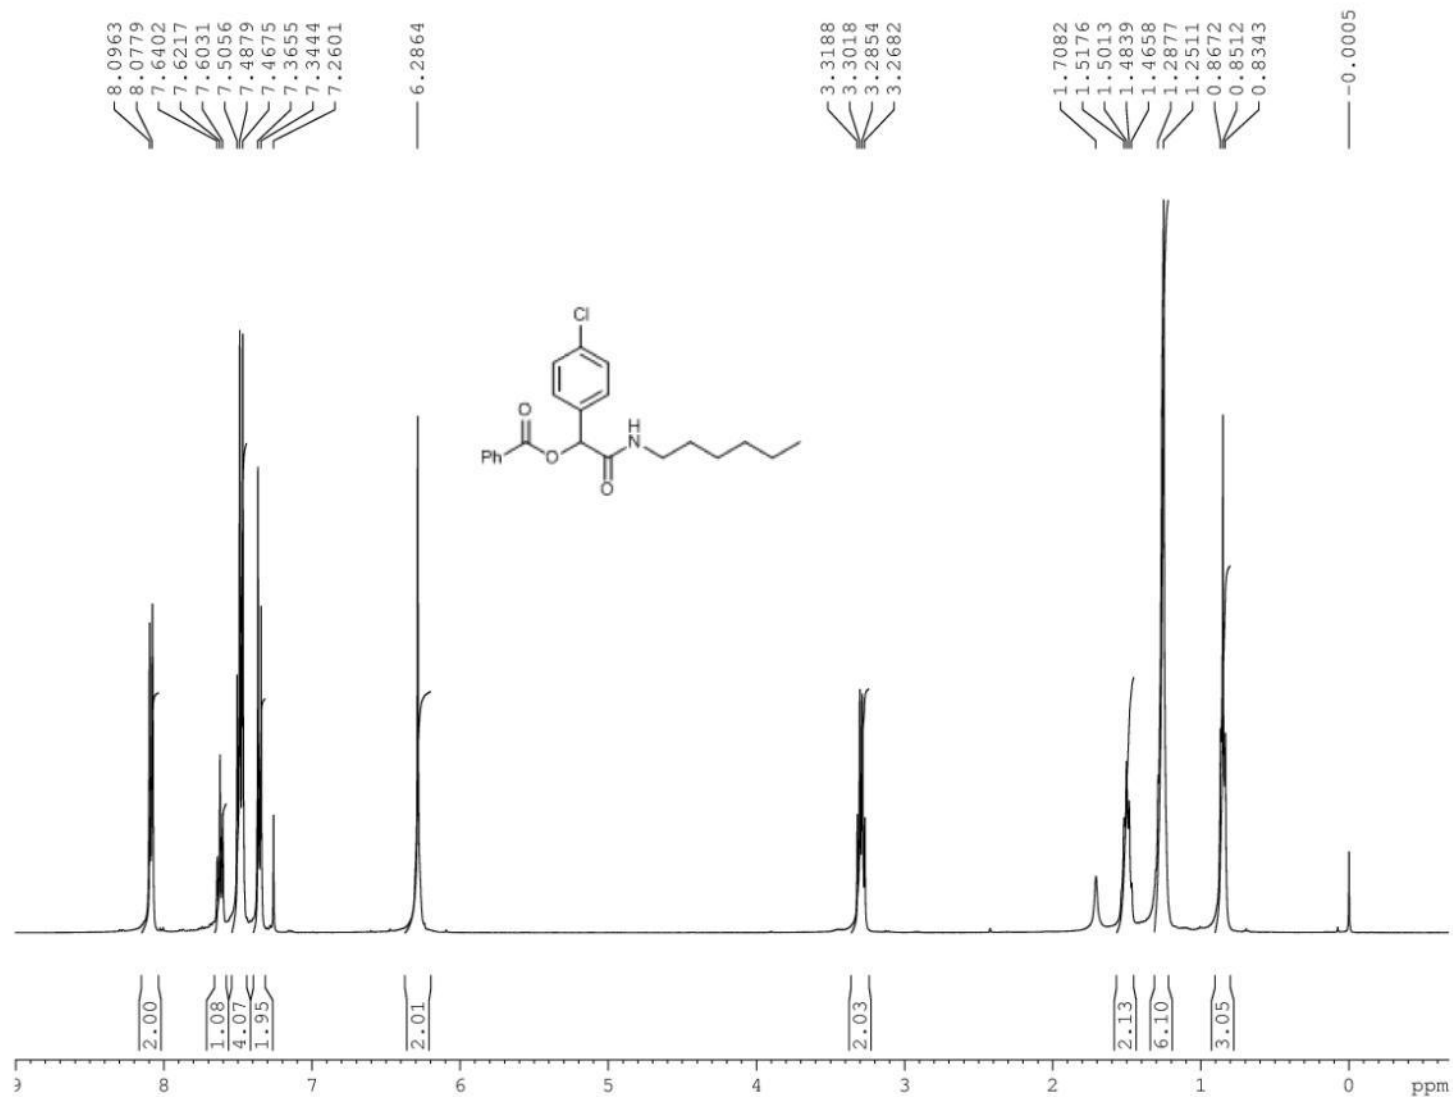



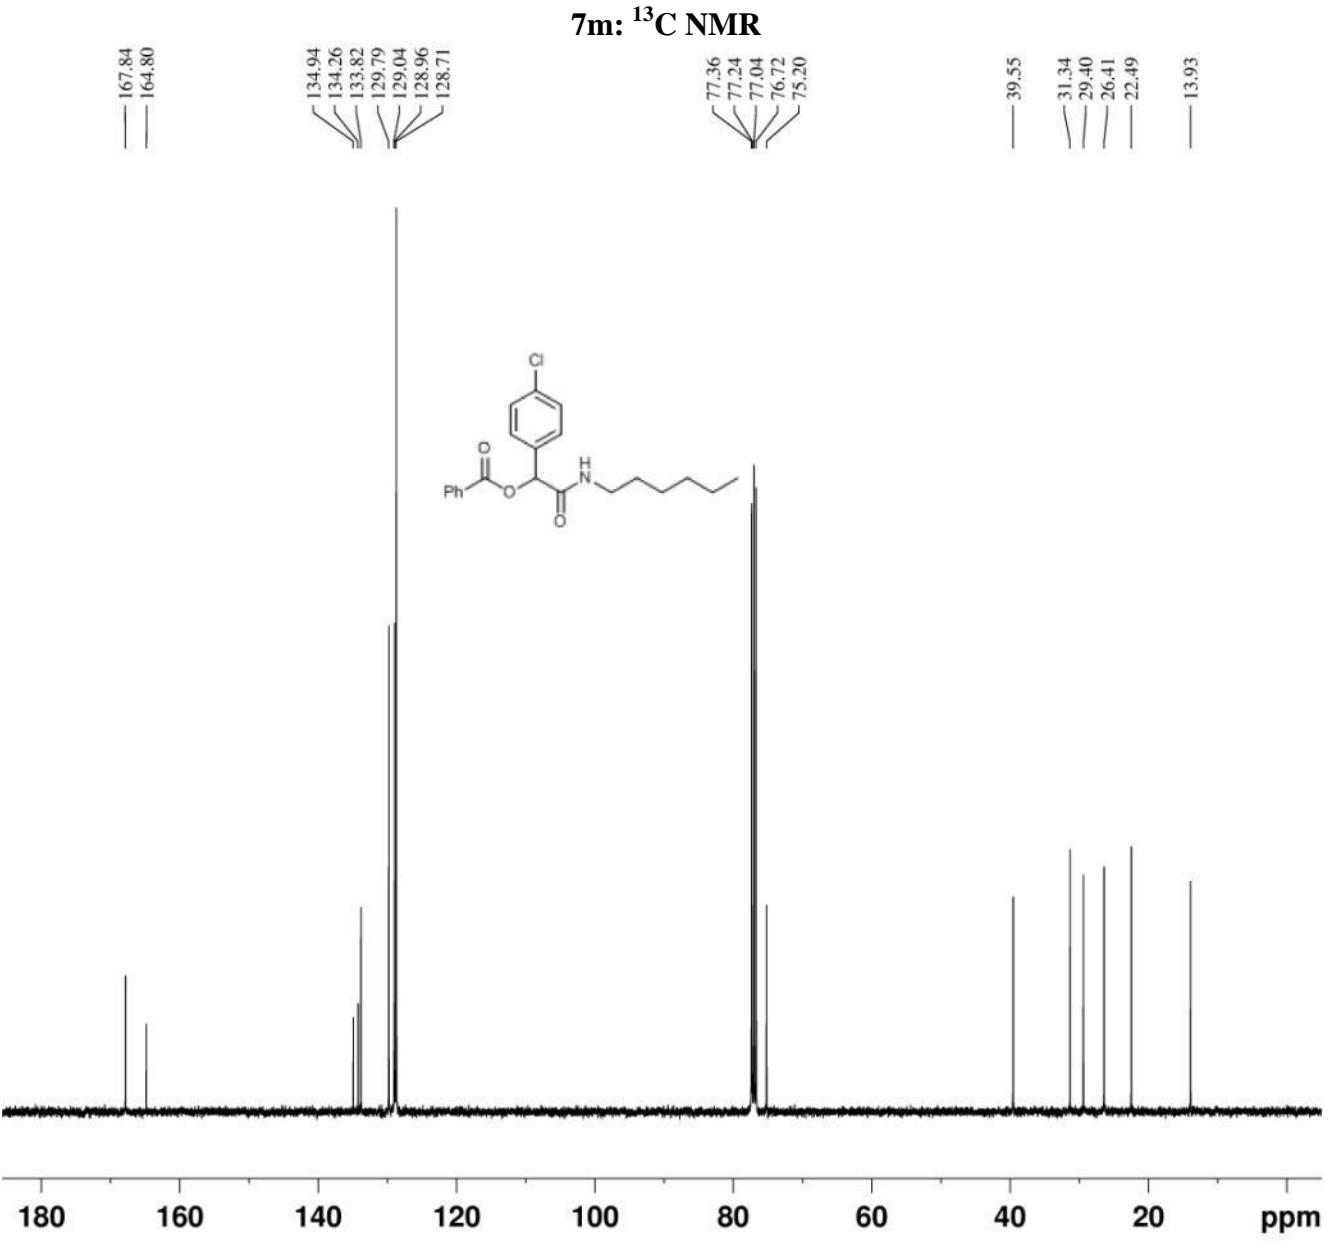

7n: <sup>1</sup>H NMR

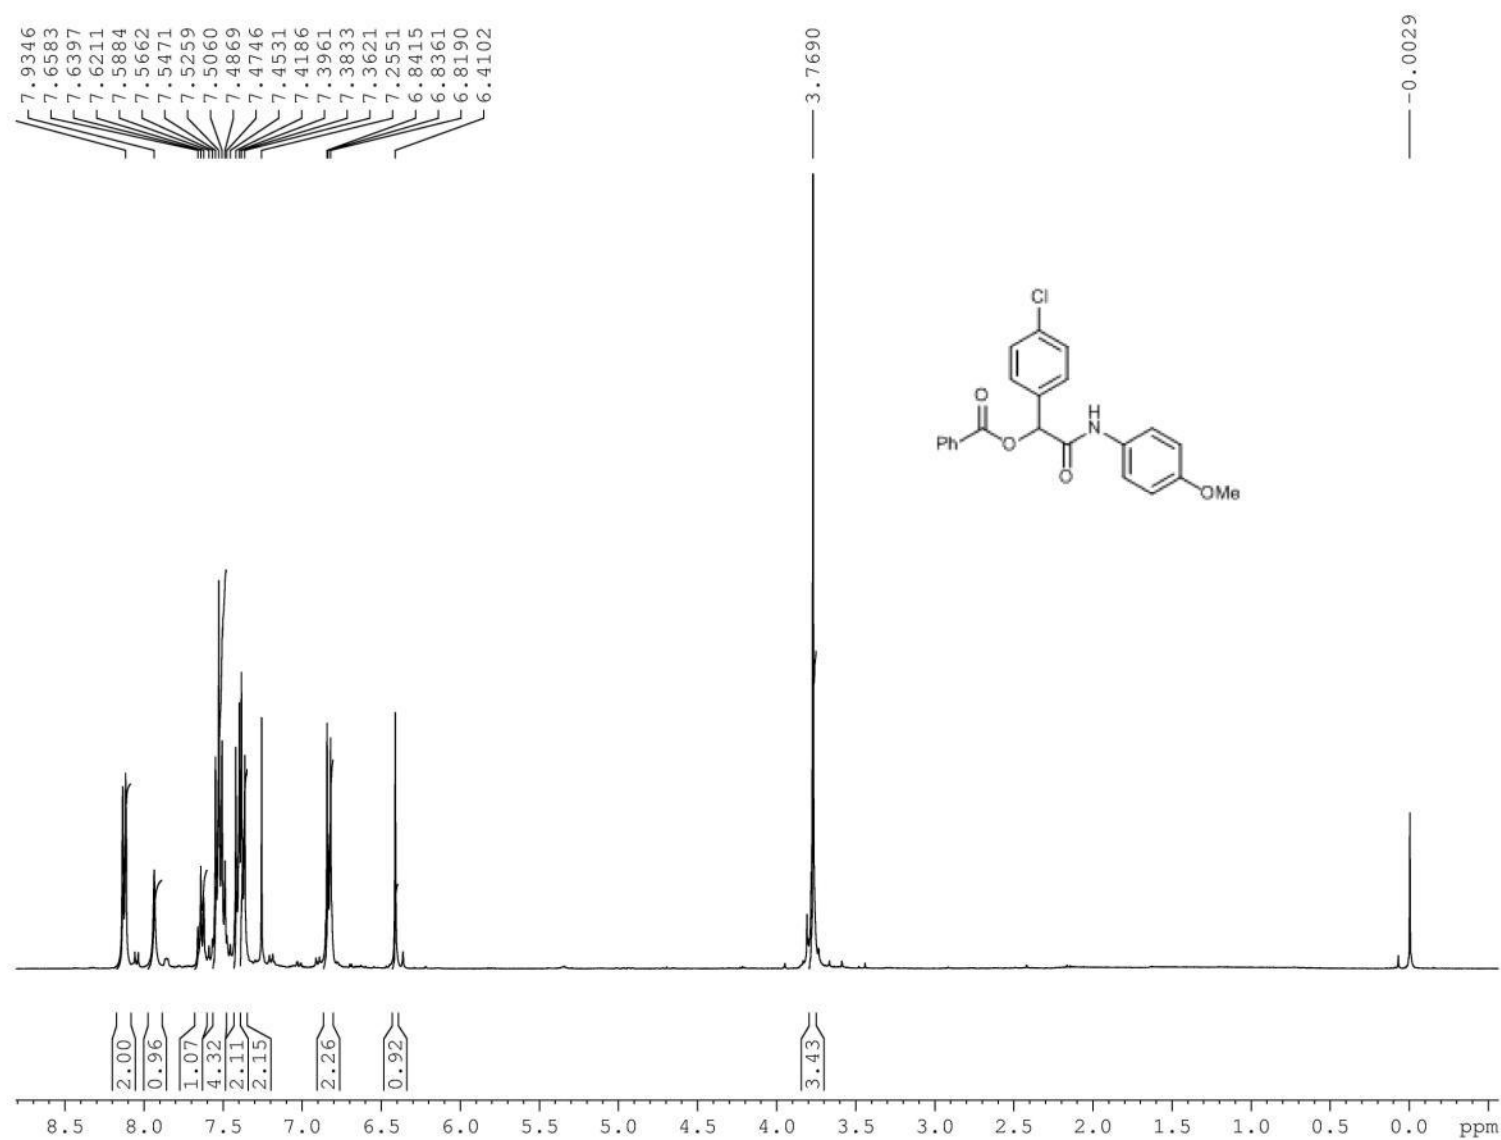

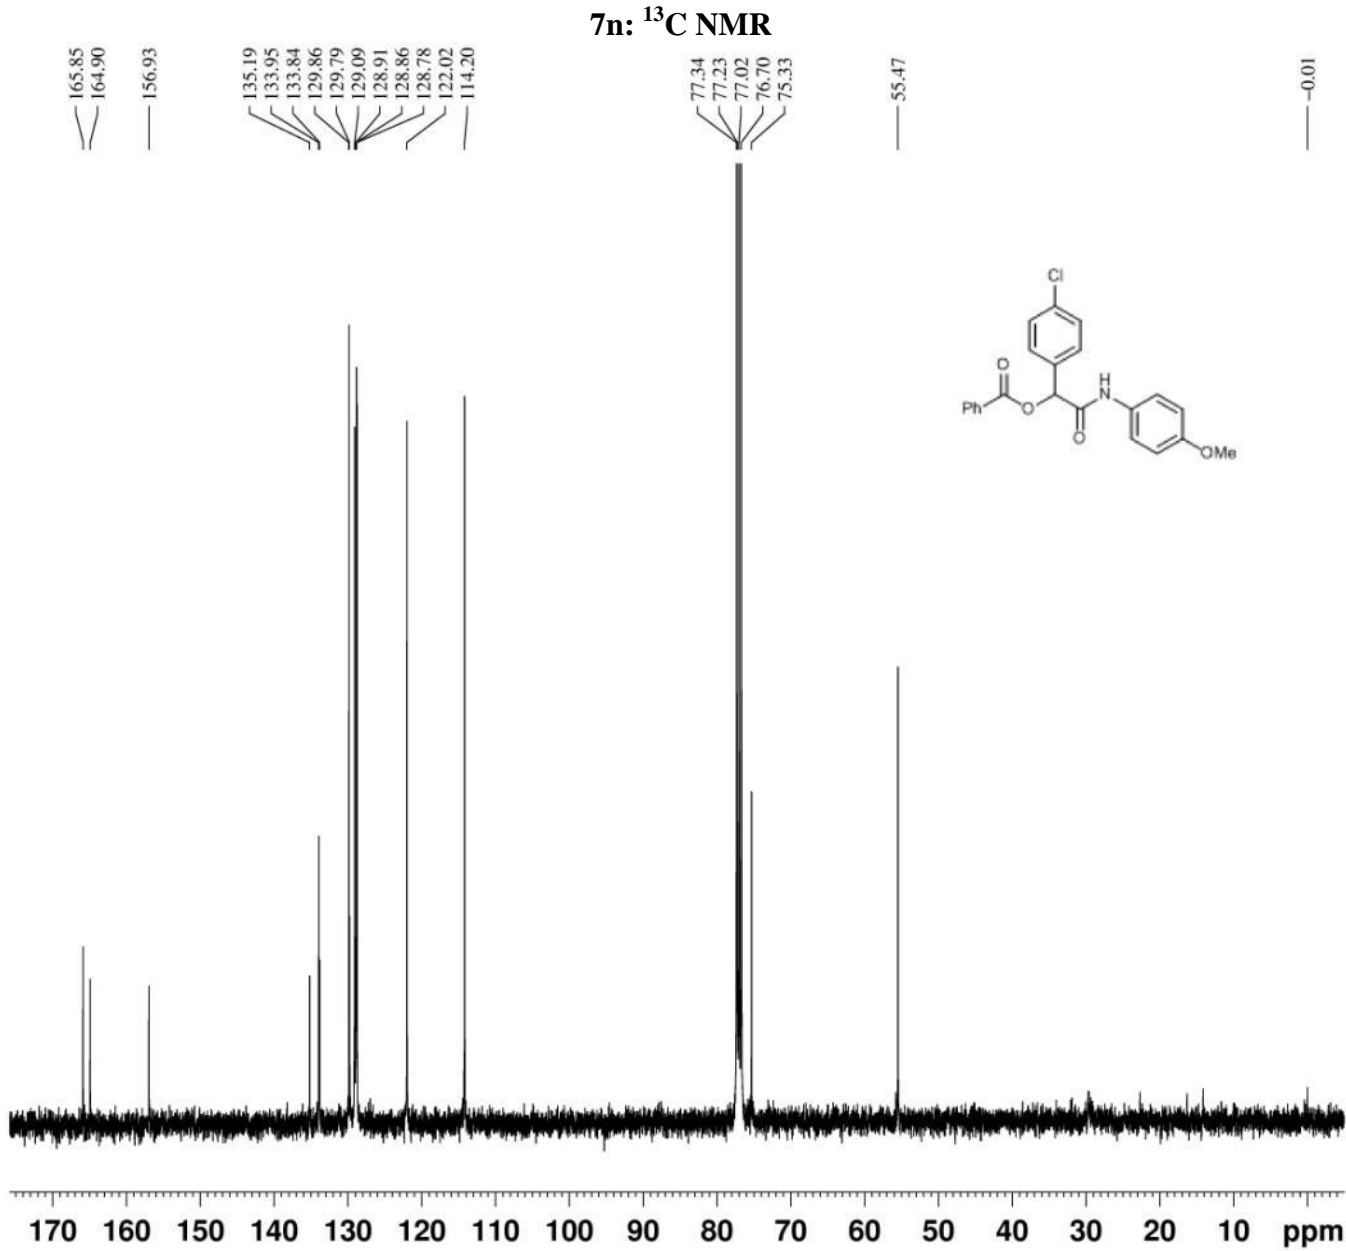

**7o:  $^1\text{H}$  NMR**

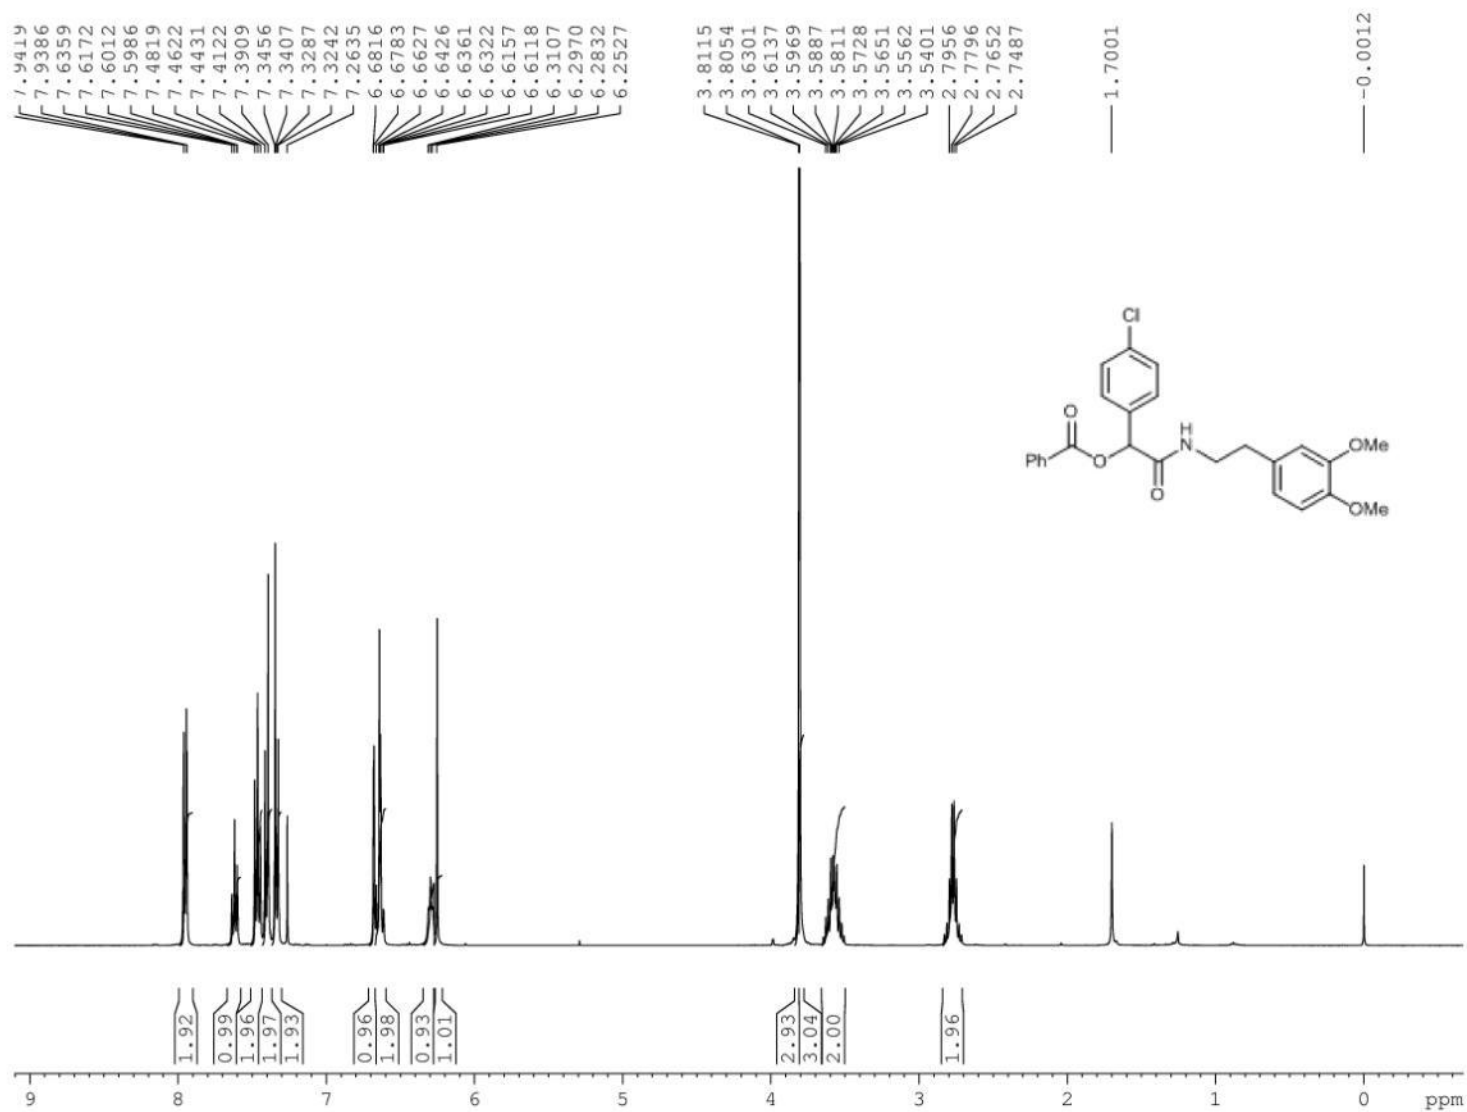

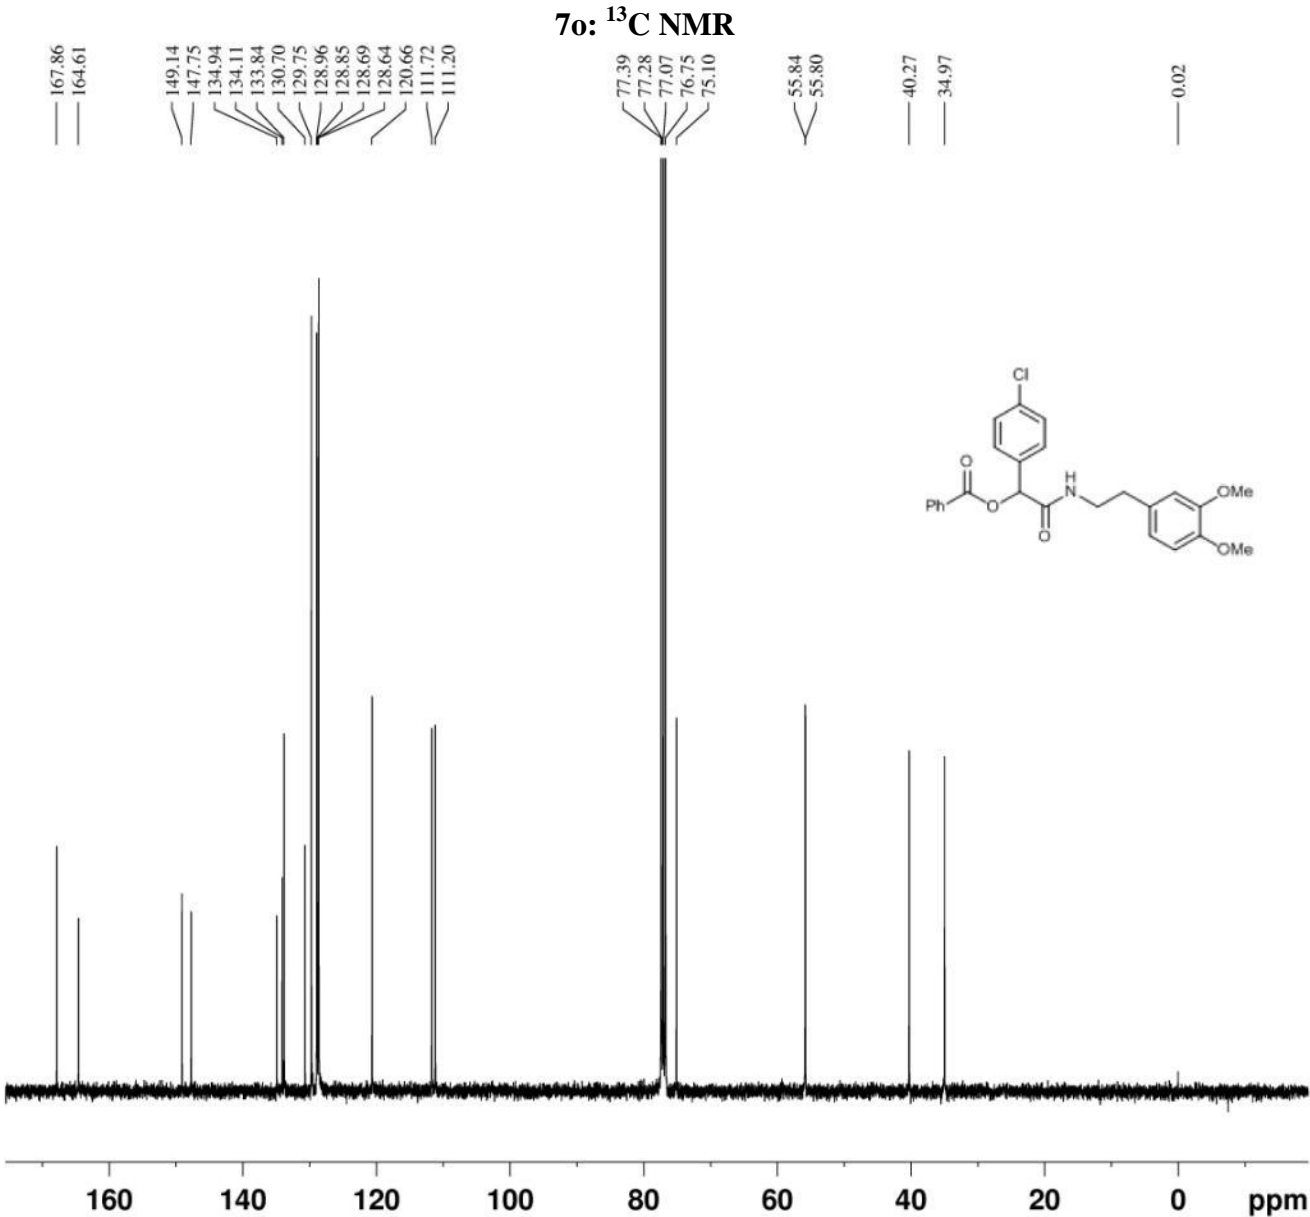

Supplement: c3ra40347e.pdf [file c3ra40347e.pdf]
